# Supplementary material for: Gsx1 promotes locomotor functional recovery after spinal cord injury
Source: PubMed Central journal article supplement — Mol Ther. 2021 Apr 23;29(8):2469–82. doi: 10.1016/j.ymthe.2021.04.027 (PMC8353206; doi:10.1016/j.ymthe.2021.04.027), 2021-04-23
Supplement: mmc1.pdf [file mmc1.pdf]

## **Supplemental Information**

### **Gsx1 promotes locomotor functional recovery after spinal cord injury**

**Misaal Patel, Ying Li, Jeremy Anderson, Sofia Castro-Pedrido, Ryan Skinner, Shun Yao Lei, Zachary Finkel, Brianna Rodriguez, Fatima Esteban, Ki-Bum Lee, Yi Lisa Lyu, and Li Cai**

## Supplemental Information

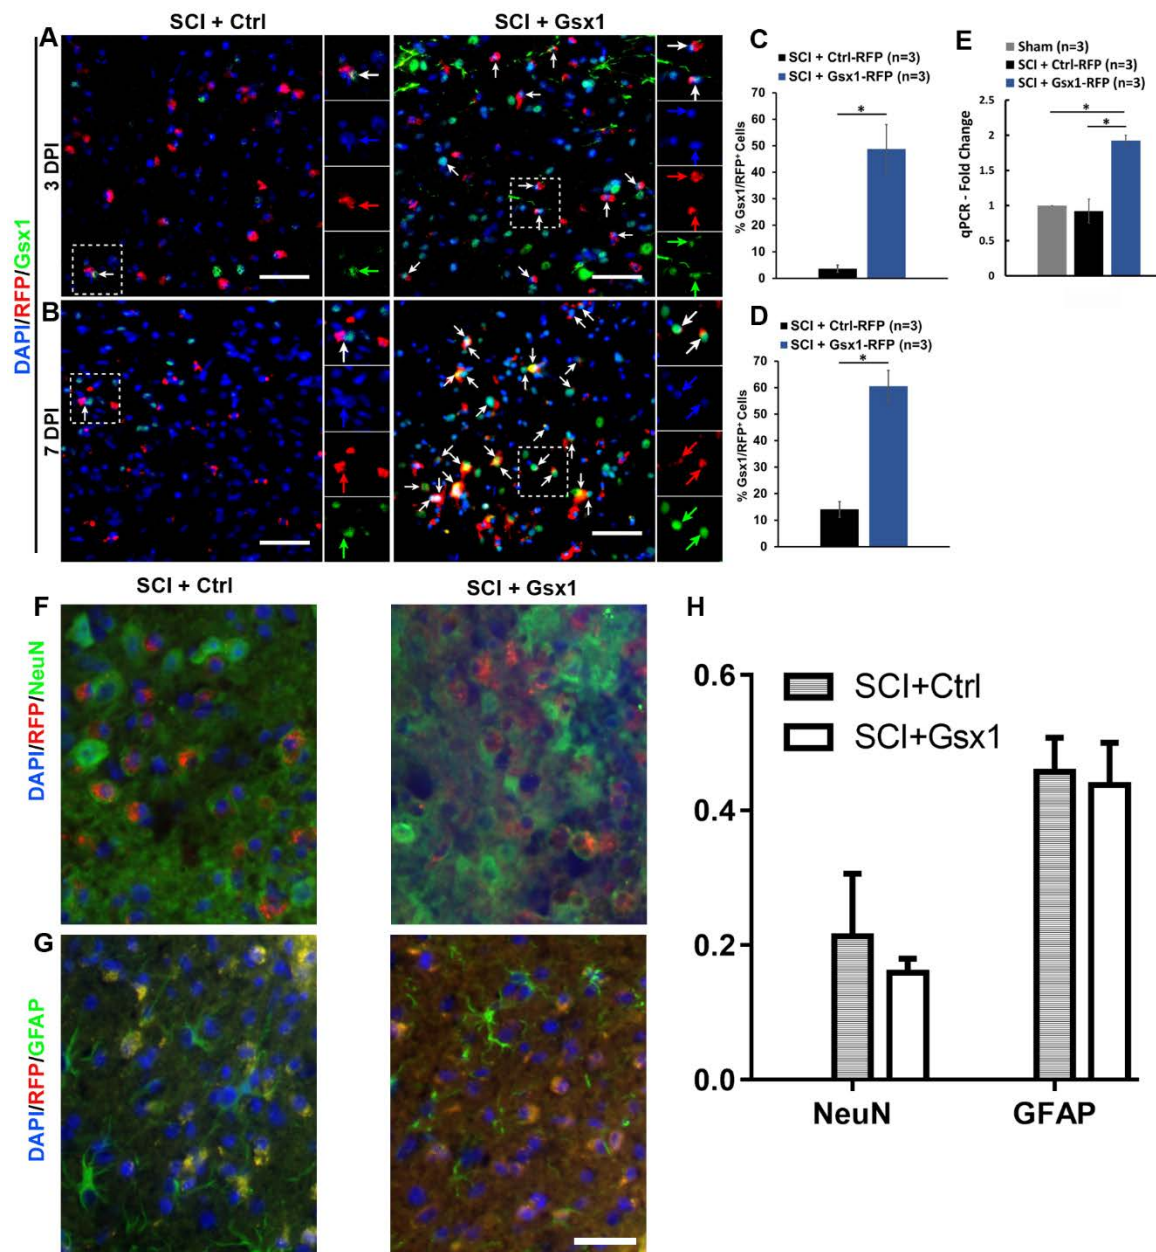

### Figure S1. Transduction of lenti-Gsx1-RFP is successful in delivering and overexpressing Gsx1 after SCI

Hemisection SCI was performed on 8-12 weeks old mice around T9-10. Immediately after lentivirus injection encoding Control (Ctrl or empty vector) or Gsx1 gene along with RFP reporter. Animals were harvested at 3 DPI (**A**) and 7 DPI (**B**). Sagittal sections were immunostained with antibodies against Gsx1 (**A** and **B**), NeuN (**F**) and GFAP (**G**). Arrows indicate co-expression of RFP and Gsx1 (green). Montage on the right of each of the image indicates small region (white box) of sagittal sections with separate channels (DAPI, RFP, and Gsx1) to indicate co-expression. Scale bars = 50  $\mu$ m. Quantification of virally transduced cells co-labeled with Gsx1 at 3 DPI (**C**) and 7 DPI (**D**). (**E**) Histograms show the RT-qPCR analysis of

Gsx1 mRNA expression at 3 DPI, normalized to the Sham. n = 3; Mean  $\pm$  SEM; \* =  $p < 0.05$  indicates statistical significance; Students' T-test (**C-D**); one-way ANOVA and Tukey post-hoc analysis (**E**). Sections of spinal cord samples at 3 DPI were also immunostained with antibodies against NeuN (**F**) and GFAP (**G**). Quantification of virally transduced cells co-labeled with NeuN and GFAP (**H**). DPI = days post injury.

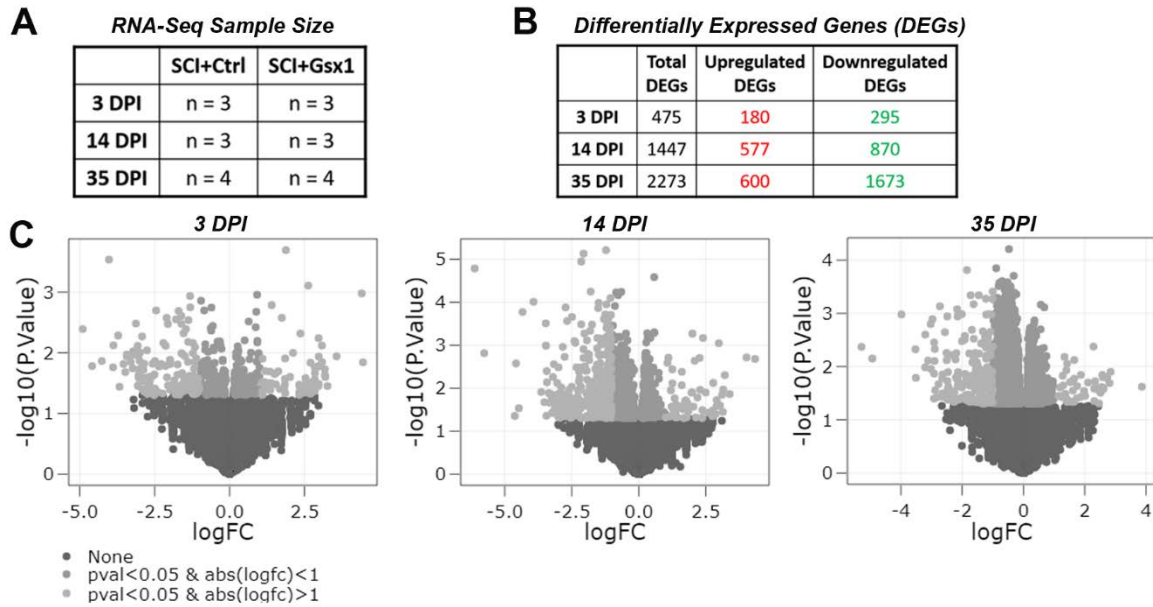

**Figure S2. Summary of RNA-seq analysis**

(A) List of the number of biological replicates used for each group (SCI+Ctrl and SCI+Gsx1) at 3, 14, and 35 DPI for RNA-seq analysis. (B) List of the total number of differentially expressed genes (DEGs;  $p < 0.05$ ) that were upregulated and downregulated at 3 DPI, 14 DPI, and 35 DPI. (C) Volcano plots depicts the differentially expressed genes at 3, 14, and 35 DPI.

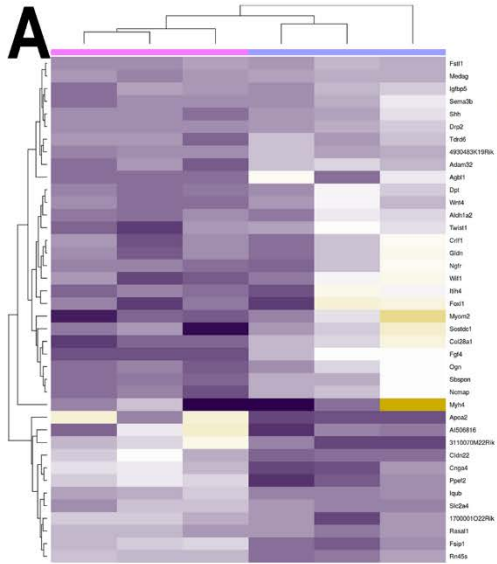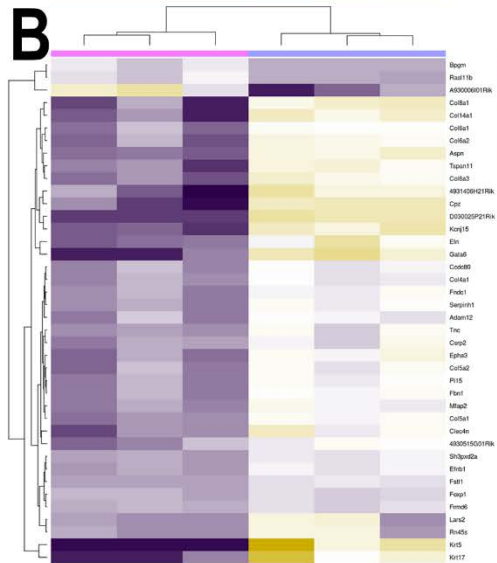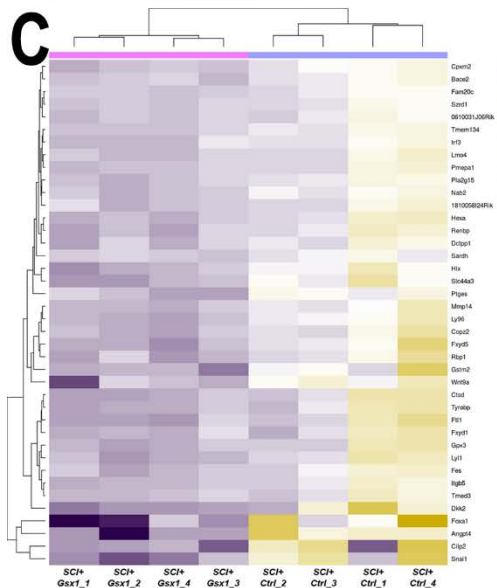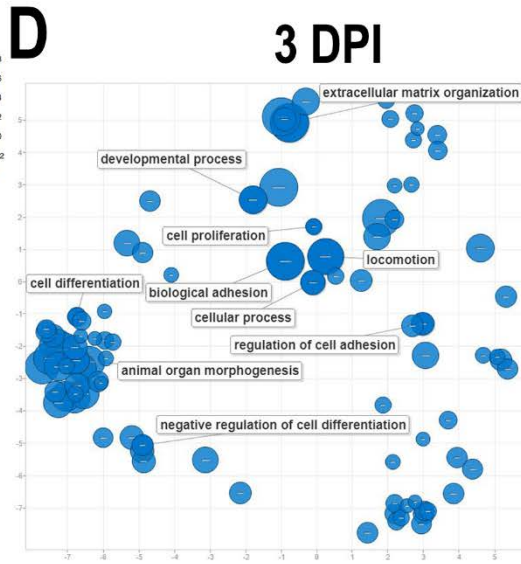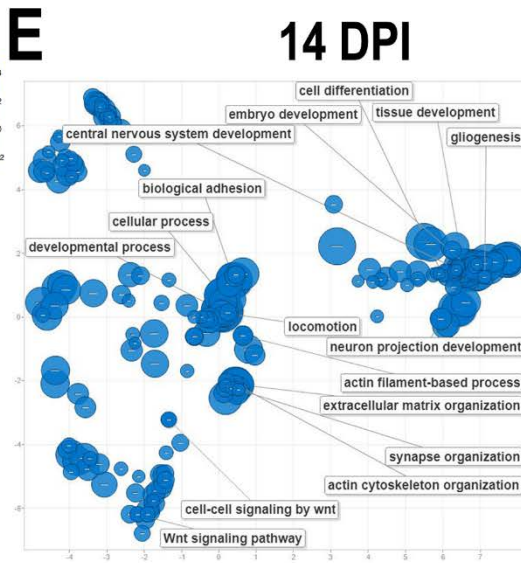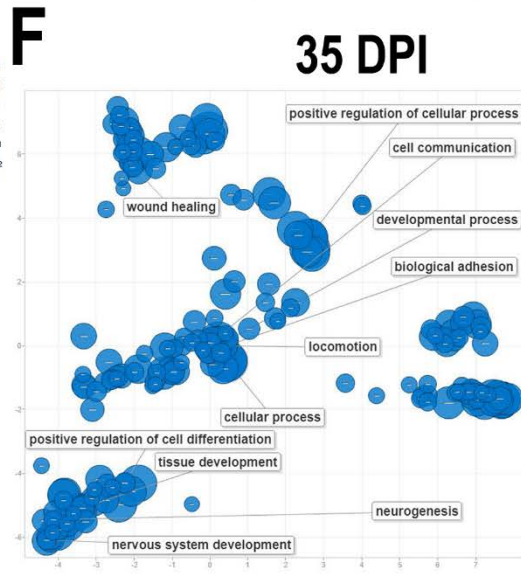

**Figure S3. Top 40 Gsx1-induced differentially expressed genes (DEGs) and functional enrichment of gene ontology (GO) terms**

Heatmaps of the top 40 DEGs between the SCI+Ctrl and SCI+Gsx1 groups at 3 DIP (**A**), 14 DPI (**B**), and 35 DPI (**C**). Purple indicates downregulation and yellow indicates upregulation of the gene expression. Scatter plots of enriched terms for biological process using REVIGO at 3 DPI (**D**), 14 DPI (**E**), and 35 DPI (**F**). Circle size indicates the  $\log_{10}(\text{p-value})$  of the GO terms. For 3 DPI, n=3; 14 DPI, n=3; and 35 DPI, n=4.

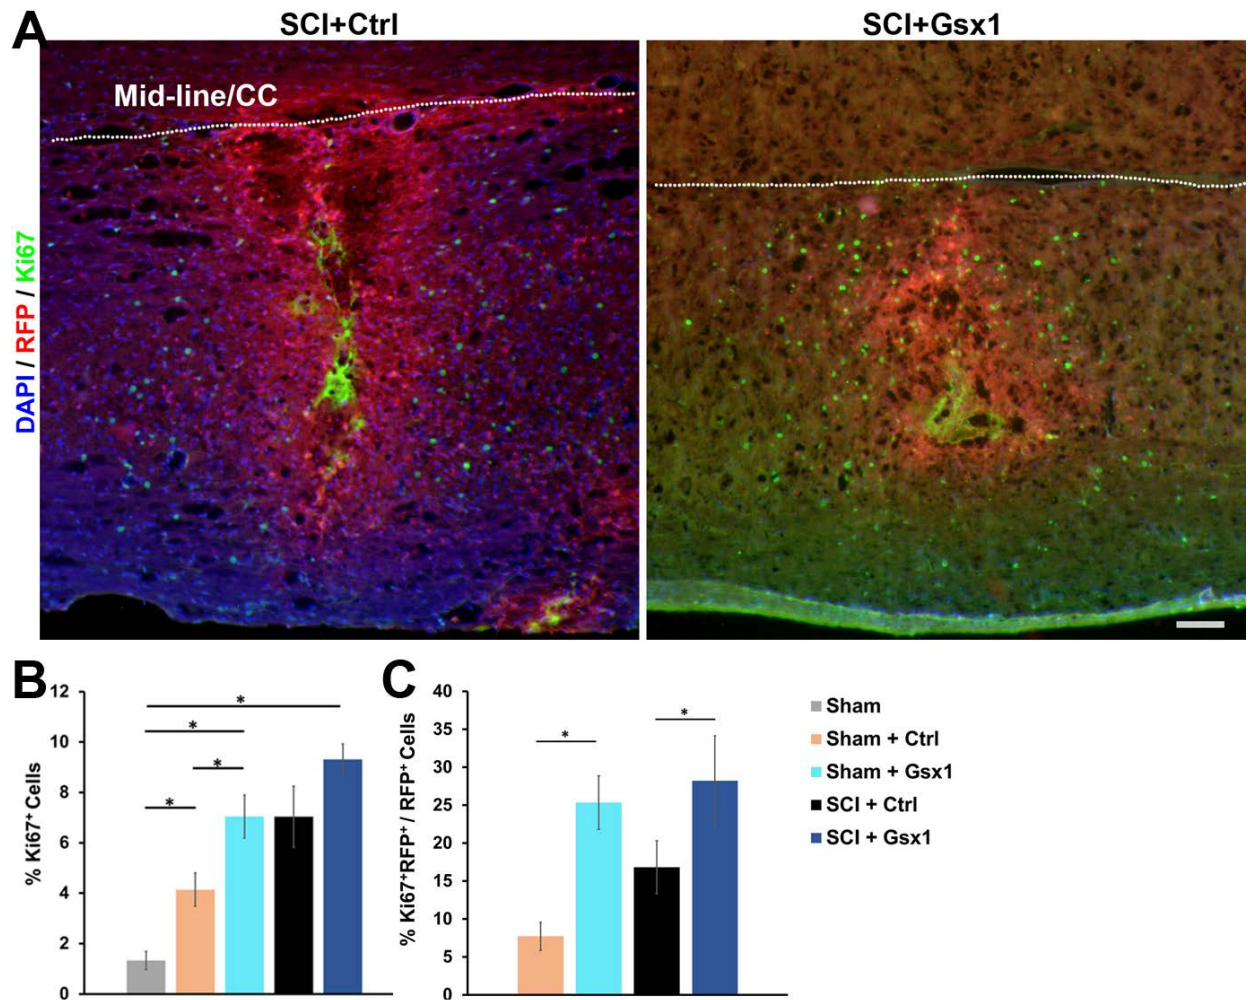

**Figure S4. Gsx1 promotes cell proliferation in both the injured and sham mice.**

(A) Representative low magnification images of sagittal sections through T9-10 spinal cord at 3 DPI showing the expression of viral reporter RFP and cell proliferation marker Ki67. Scale bar=100  $\mu$ m. White dotted line indicates the midline and the central canal of the spinal cord. Red dots/signals show virally transduced cells and green dots show Ki67+ cells at the lesion site. Histograms show the quantification of Ki67+ cells (B) and Ki67+/RFP+ co-labeled cells (C) among RFP+ cells. n = 3; Mean  $\pm$  SEM; \* = p < 0.05 indicates statistical significance; one-way ANOVA and Tukey post-hoc analysis.

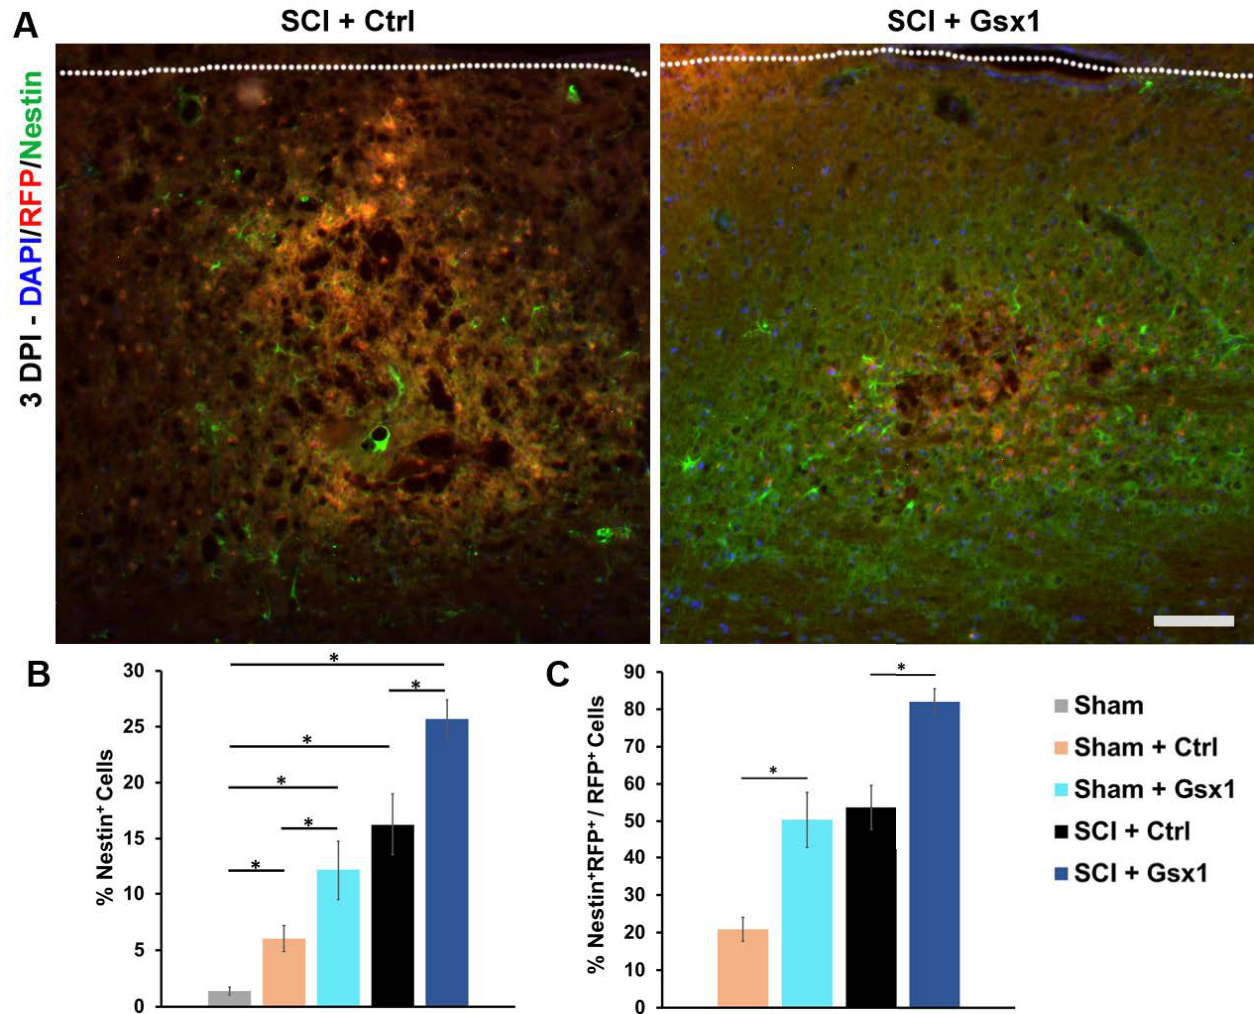

**Figure S5. Gsx1 increased the number of NSPCs in both injured and sham mice.**

(A) Representative low magnification images of sagittal sections through T9-10 spinal cord at 3 DPI showing the expression of viral reporter RFP and NSPC marker Nestin. Scale bar=100  $\mu$ m. White dotted line indicates the midline and central canal of the spinal cord. Red dots/signals show virally transduced cells and green dots show Nestin<sup>+</sup> cells. Histograms show the quantification of Nestin<sup>+</sup> (B) and Nestin<sup>+</sup>/RFP<sup>+</sup> co-labeled cells (C) among RFP<sup>+</sup> cells. n = 3; Mean  $\pm$  SEM; \* = p < 0.05 indicates statistical significance; one-way ANOVA and Tukey post-hoc analysis.



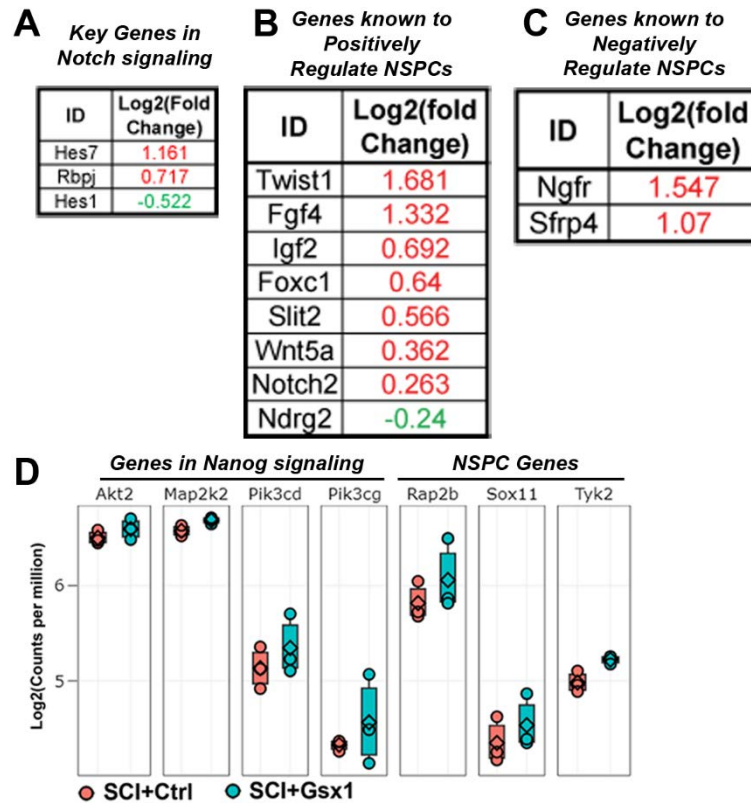

**Figure S6. Gsx1 upregulates NSPC signaling pathways.**

Lists of differentially expressed genes that are known to promote Notch signaling (**A**), and regulate NSPCs (**B-C**) identified by RNA-seq (DESeq2) analysis at 3 DPI. (**D**) Gene expression box plots of the genes associated with Nanog signaling pathway and NSPC genes. Each dot represents the gene expression as  $\log_2(\text{count per million})$  for one biological replicate sample.  $n=3$  for all data points; Mean  $\pm$  SEM; \* =  $p < 0.05$  indicates statistical significance; Students' t-test.

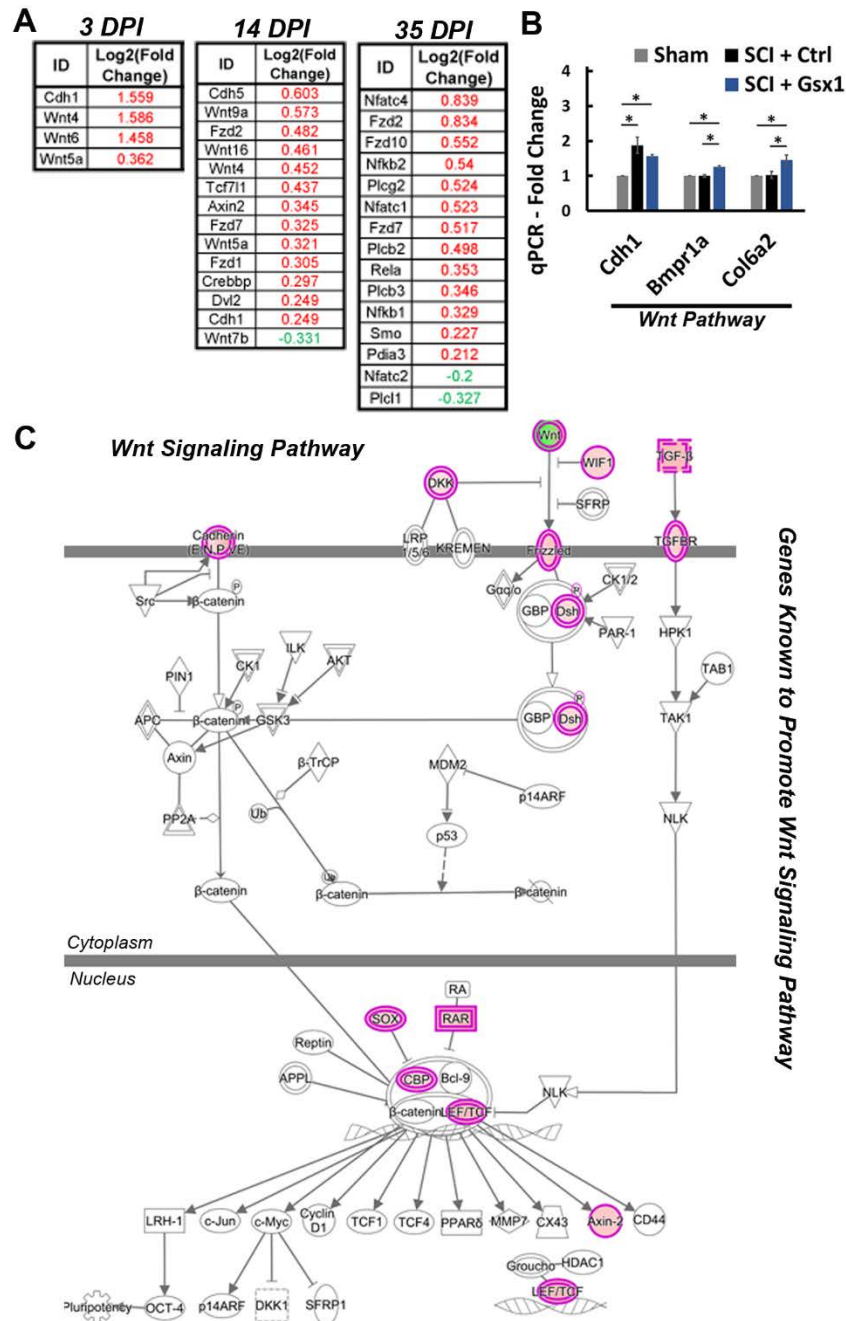

**Figure S7. Gsx1 upregulates Wnt signaling pathway in the injured spinal cord.**

(A) Lists of differentially expressed genes that are involved in Wnt signaling at 3, 14, and 35 DPI from RNA-seq analysis. (B) A histogram shows the RT-qPCR analysis of the genes involved in the Wnt signaling pathway (Cdh1, Bmpr1a and Col6a2). N=3; Mean  $\pm$  SEM; \* =  $p < 0.05$  indicates statistical significance; One-way ANOVA followed by Tukey post-hoc test. (C) A diagram depicts the upregulated Wnt signaling pathway by Gsx1 expression revealed by IPA.

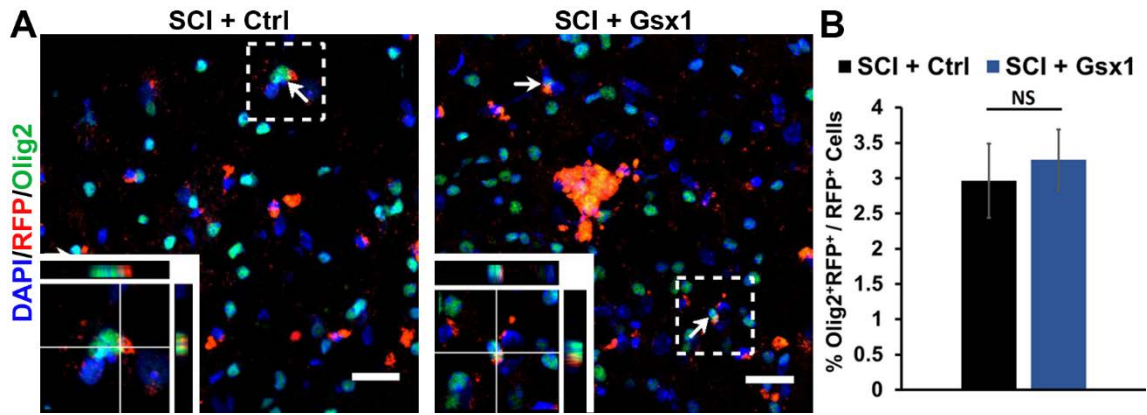

**Figure S8. Gsx1 treatment does not change the number of oligodendrocytes after SCI**

Hemisection SCI was performed on 8-12 weeks old mice around T10 followed by lentivirus injection encoding Ctrl or Gsx1 gene along with RFP reporter. Animals were harvested 56 DPI and sagittal sections are immunostained with oligodendrocyte marker, Olig2 (**A**). Bottom left of the image includes the higher magnification z-stack view of the area denoted by a dashed white line to indicate co-expression. Scale bar = 20  $\mu$ m. (**B**) A histogram shows the quantification of Olig2<sup>+</sup>/RFP<sup>+</sup> among RFP<sup>+</sup> cells at 56 DPI. n = 6; Mean  $\pm$  SEM; \* = p < 0.05 indicates statistical significance; Students' t-test.

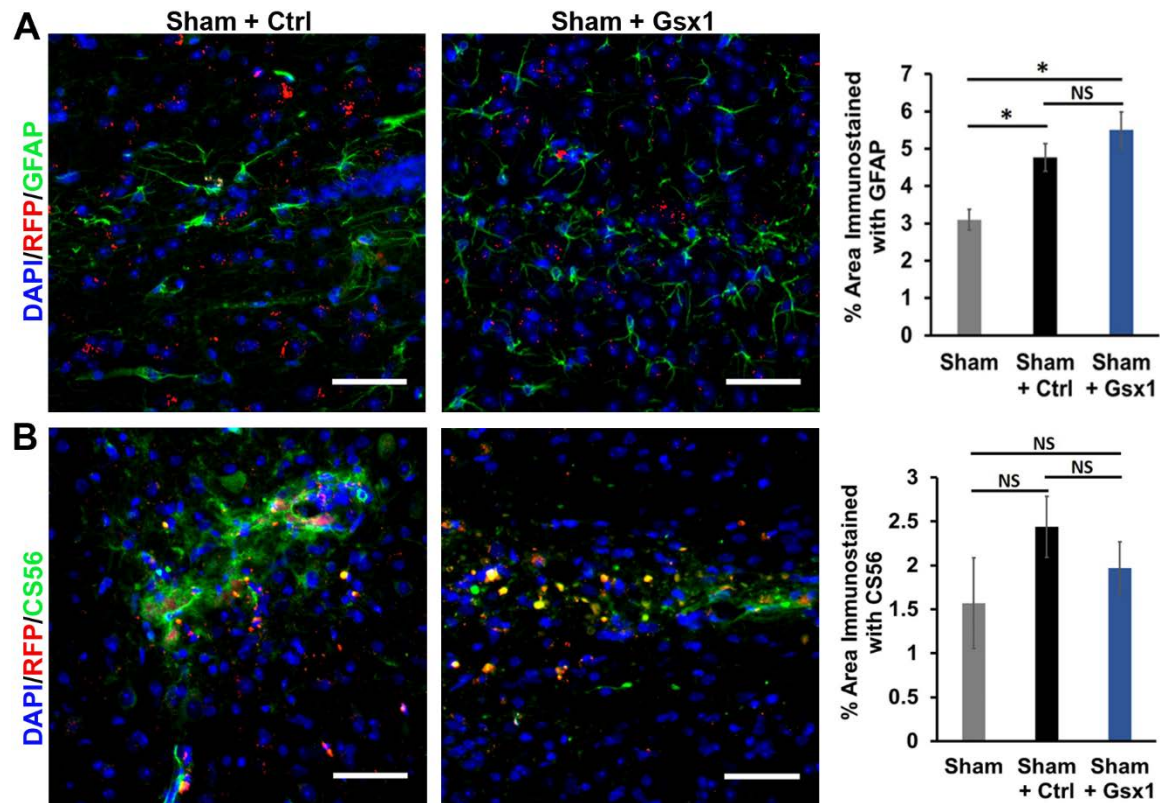

**Figure S9. Effects of Gsx1 on astrogliosis and glial scar formation in the uninjured spinal cord is not significant**

Representative fluorescence images of sagittal sections through the lesion site in the spinal cord at 56 DPI show the expression of viral reporter RFP, GFAP (**A**) and chondroitin sulfate proteoglycan (CSPG, stained with CS56) (**B**), and the quantification of the immunostained area with anti-GFAP and anti-CS56 around the injury site is shown on the right. Scale bar =50  $\mu$ m, n=4 for all three groups: Sham, Sham+Ctrl and Sham+Gsx1. Mean  $\pm$  SEM; \* =  $p < 0.05$  indicates statistical significance; One-way ANOVA followed by Tukey post-hoc test.

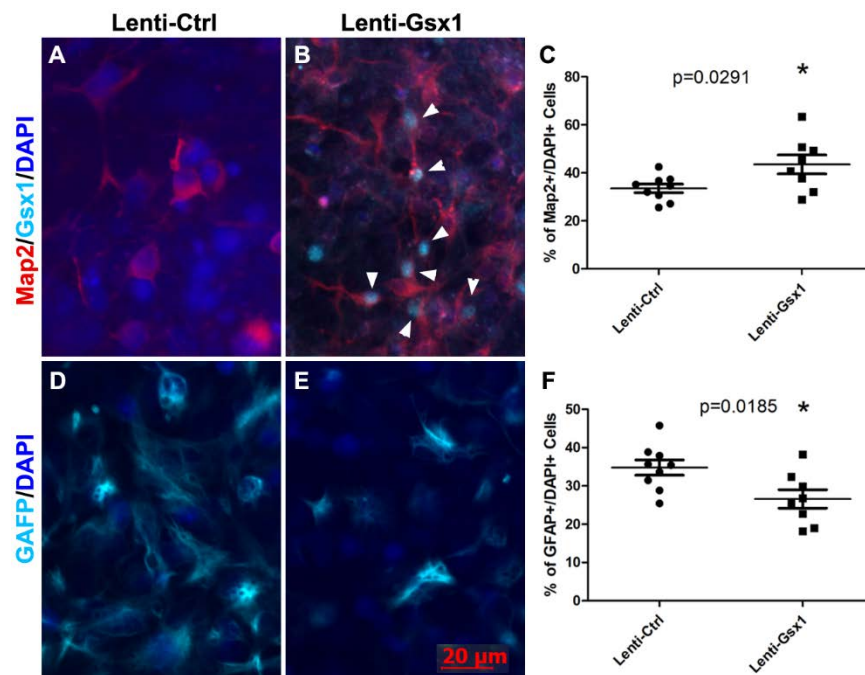

**Figure S10. Gsx1 expression promotes neurogenesis and inhibits astrogliosis *in vitro***

Neural stem cells, NE-4C (ATCC), were cultured for 3 days post transduction before inducing differentiation with  $10^{-7}$  M retinoic acid. The effect of Gsx1 on neural differentiation was performed by lentivirus transduction, a control lentivirus (Lenti-Ctrl) (A, D) and lentivirus carrying Gsx1 (Lenti-Gsx1) (B, E) were transduced into NE-4C cells. Cells were selected with 0.5  $\mu$ g/mL Puromycin for 48-hours 3 days after viral transduction and cultured for 14 more days and followed by immunocytochemistry assay. Arrowheads indicate Gsx1-labeled cells in cyan color confirming lentivirus-mediated Gsx1 expression in virally transduced cells. Cell nuclei were labeled with DAPI in blue. (C, F) histograms of the percentages of MAP2+ neurons and GFAP+ astrocytes over the total number of DAPI+ cells. N=9; Data shown as Mean  $\pm$  SEM. Students' T-test. p-value < 0.05 indicates statistical significance.

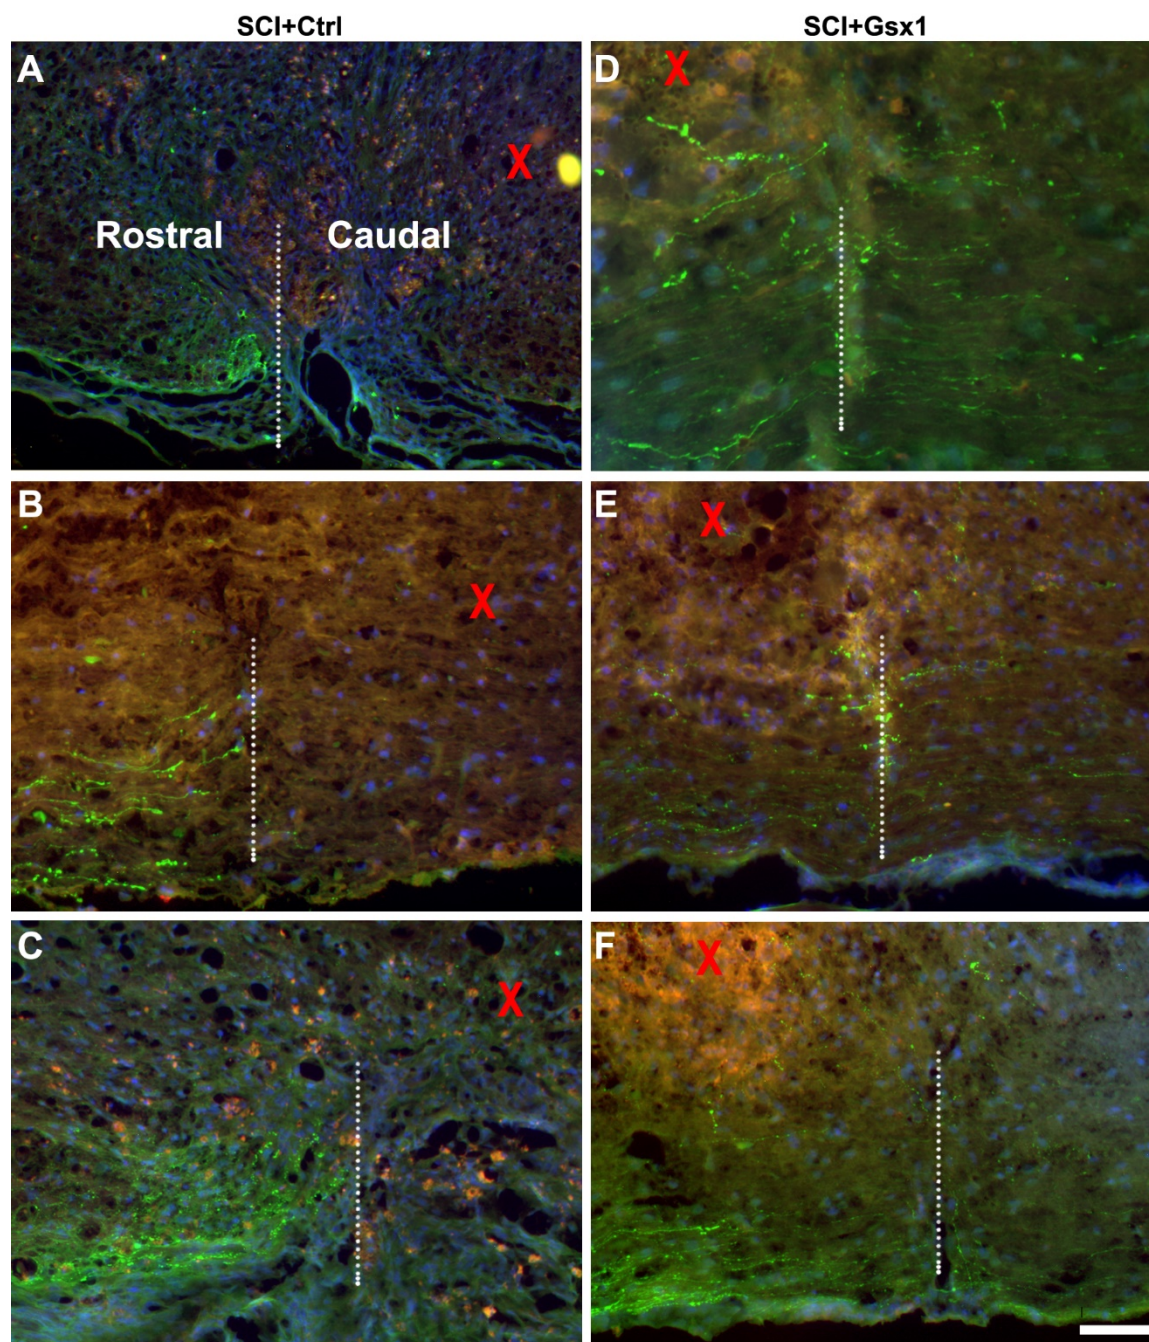

**Figure S11. Gsx1 expression promotes 5-HT neuronal activity**

Hemisection SCI was performed on 8-12 weeks old mice around T10 followed by lentivirus injection immediately after SCI. Representative images of sagittal section of the spinal cord from the SCI+Ctrl (n=3: **A-C**) and SCI+Gsx1 (n=3: **D-F**) groups at 35 DPI. The white dotted line indicates the hemisection site. "X" indicates the virus injection site. In the SCI+Ctrl group, 5-HT immunostained axons stopped rostral to the lesion site (**A-C**). In the SCI+Gsx1 group, 5-HT stained axons were detected caudally to the lesion site (**D-F**). Scale bar = 20  $\mu$ m.

Supplementary Tables S1-3. IPA reports of the DEG-associated signaling pathways induced by Gsx1 expressoin (see attached Microsoft Excel files).

Supplementary Table S4. Top 20 upregulated and 20 downregulated DEGs determined by RNA-seq analysis

|                            | 3 DPI         |                   | 14 DPI   |                   | 35 DPI        |                   |
|----------------------------|---------------|-------------------|----------|-------------------|---------------|-------------------|
|                            | ID            | Log2(Fold Change) | ID       | Log2(Fold Change) | ID            | Log2(Fold Change) |
| Top 20 Upregulated Genes   | Ppef2         | 1.7456            | Bpgm     | 0.6457            | 9330175M20Rik | 0.9304            |
|                            | Cnga4         | 1.5203            | Snca     | 0.6409            | Gm2897        | 0.9209            |
|                            | Tmem51as1     | 1.4642            | Fam46c   | 0.5624            | 4930525G20Rik | 0.8941            |
|                            | Al506816      | 1.3532            | Gjc2     | 0.5451            | Zfp819        | 0.8928            |
|                            | Cdsn          | 1.3006            | Nkx2-9   | 0.5346            | Ripply2       | 0.8629            |
|                            | G530011O06Rik | 1.2743            | Ppp1r14a | 0.5226            | Peg12         | 0.8311            |
|                            | Fsip1         | 1.2560            | Rsl11b   | 0.5223            | Mum11         | 0.8199            |
|                            | 3110070M22Rik | 1.2345            | Prr18    | 0.5131            | 1500015L24Rik | 0.8142            |
|                            | Fbxw10        | 1.2303            | Klk6     | 0.5103            | 1110015O18Rik | 0.8049            |
|                            | Galr3         | 1.2074            | Ptgs1    | 0.5076            | 4930441O14Rik | 0.8042            |
|                            | Rn45s         | 1.2041            | Ptp4a1   | 0.4919            | Sox14         | 0.7864            |
|                            | C130026I21Rik | 1.1821            | S100b    | 0.4672            | Zfp804b       | 0.7683            |
|                            | Erv3          | 1.1741            | Bin2     | 0.4563            | Mir331        | 0.7637            |
|                            | Afp           | 1.1694            | Tmem88b  | 0.4517            | Cacna1f       | 0.7612            |
|                            | A330048O09Rik | 1.1366            | Mbp      | 0.4422            | Fgf5          | 0.7601            |
|                            | Xlr3a         | 1.1299            | Atp10b   | 0.4393            | Mipol1        | 0.7477            |
|                            | 1700001O22Rik | 1.1218            | lsg20    | 0.4377            | Mir149        | 0.7471            |
|                            | Apoa2         | 1.1206            | Al848285 | 0.4364            | Tmem232       | 0.7392            |
|                            | Mir466i       | 1.1092            | Arhgef37 | 0.4320            | Gpr88         | 0.7370            |
|                            | Crybb1        | 1.0996            | Plp1     | 0.4288            | 6430584L05Rik | 0.7369            |
| Top 20 Downregulated Genes | Col28a1       | -2.4223           | Col1a1   | -2.0110           | Snai1         | -1.4631           |
|                            | Ogn           | -2.0659           | Aspn     | -1.8378           | Wfdc17        | -1.4354           |
|                            | Wif1          | -1.9547           | Col1a2   | -1.7949           | Dkk2          | -1.4094           |
|                            | Sbspon        | -1.7291           | Col6a3   | -1.6645           | Cilp2         | -1.3829           |
|                            | Itih4         | -1.6936           | Col5a1   | -1.4541           | H19           | -1.3015           |
|                            | Twist1        | -1.6811           | Kcnj15   | -1.4052           | Asgr2         | -1.2978           |
|                            | Sostdc1       | -1.6651           | Mfap5    | -1.3046           | Atp6v0a4      | -1.2820           |
|                            | Plekha4       | -1.6475           | Thbs1    | -1.2104           | Foxa1         | -1.2655           |
|                            | Ncmap         | -1.6447           | Serpinh1 | -1.1806           | Apoc2         | -1.2628           |
|                            | Aqp1          | -1.6233           | Ppic     | -1.1093           | Angpt4        | -1.2556           |
|                            | Gldn          | -1.6205           | Loxl1    | -1.0945           | Fam180a       | -1.2413           |
|                            | Prx           | -1.6059           | Tnc      | -1.0594           | Cd8b1         | -1.2400           |
|                            | Wnt4          | -1.5861           | Ltbp2    | -1.0186           | Twist1        | -1.2251           |
|                            | Cdh1          | -1.5587           | Cpz      | -1.0108           | Pi16          | -1.2225           |
|                            | Ngfr          | -1.5471           | Scara5   | -0.9871           | Gstm2         | -1.2204           |
|                            | Slc43a1       | -1.5467           | Scara3   | -0.9867           | Wnt9a         | -1.1770           |
|                            | Foxd1         | -1.5382           | Rcn3     | -0.9815           | Dpt           | -1.1667           |
|                            | Kcnj13        | -1.5141           | Mrc2     | -0.9796           | Col6a2        | -1.1481           |
|                            | Crif1         | -1.4928           | Sh3pxd2a | -0.9693           | Gpnmh         | -1.1465           |
|                            | Dpt           | -1.4878           | Tspan11  | -0.9674           | Ms4a7         | -1.1420           |

**Supplementary Table S5. List of primary and secondary antibodies used for immunohistochemistry**

|                                        | Vendor, Catalog                      | Host Species | Type       | RRID        | Dilution |
|----------------------------------------|--------------------------------------|--------------|------------|-------------|----------|
| <b>Primary Antibody</b>                |                                      |              |            |             |          |
| Gsx1                                   | Millipore Sigma, SAB2104632          | Rabbit       | Polyclonal | AB_10667904 | 1 : 200  |
| Ki67                                   | Abcam, ab15580                       | Rabbit       | Polyclonal | AB_443209   | 1 : 1000 |
| Nestin                                 | Abcam, ab6142                        | Mouse        | Monoclonal | AB_305313   | 1 : 200  |
| Caspase3                               | Cell Signaling, 9661S                | Rabbit       | Polyclonal | AB_2341188  | 1 : 300  |
| DCX                                    | Santa Cruz Biotechnology, sc-8067    | Goat         | Polyclonal | AB_2088491  | 1 : 100  |
| PDGFRa                                 | Abcam, ab61219                       | Rabbit       | Polyclonal | AB_2162341  | 1 : 100  |
| NeuN                                   | Millipore Sigma, MAB377              | Mouse        | Monoclonal | AB_2298772  | 1 : 300  |
| GFAP                                   | Millipore Sigma, G3893               | Mouse        | Monoclonal | AB_477010   | 1 : 400  |
| Olig2                                  | Millipore Sigma, AB9610              | Rabbit       | Polyclonal | AB_570666   | 1 : 500  |
| vGlut2                                 | Millipore Sigma, AB2251-I            | Guinea Pig   | Polyclonal | AB_2665454  | 1 : 1000 |
| ChAT                                   | Millipore Sigma, SAB2500236          | Goat         | Polyclonal | AB_10603616 | 1 : 300  |
| GABA                                   | Millipore Sigma, A-2052              | Rabbit       | Polyclonal | AB_477652   | 1 : 3000 |
| CS56                                   | Millipore Sigma, C8035               | Mouse        | Monoclonal | AB_476879   | 1 : 200  |
| Map2                                   | Invitrogen, MA5-12826                | Mouse        | Monoclonal | AB_10976831 | 1 : 500  |
| GFAP                                   | Invitrogen, PA1-10019                | Rabbit       | Polyclonal | AB_1074611  | 1 : 1000 |
| <b>Secondary Antibody</b>              |                                      |              |            |             |          |
| Alexa Fluor 488 Donkey anti Mouse      | Jackson Immuno Research, 715-545-150 | -            | Polyclonal | AB_2340846  | 1 : 200  |
| Alexa Fluor 488 Donkey anti Rabbit     | Jackson Immuno Research, 711-545-152 | -            | Polyclonal | AB_2313584  | 1 : 200  |
| Alexa Fluor 488 Donkey anti Goat       | Jackson Immuno Research, 705-545-003 | -            | Polyclonal | AB_2340428  | 1 : 200  |
| Alexa Fluor 488 Donkey anti Guinea Pig | Jackson Immuno Research, 706-545-148 | -            | Polyclonal | AB_2340472  | 1 : 200  |
| Alexa Fluor 647 Donkey anti Mouse      | Jackson Immuno Research, 715-605-150 | -            | Polyclonal | AB_2340862  | 1 : 200  |
| Alexa Fluor 647 Donkey anti Rabbit     | Jackson Immuno Research, 711-605-152 | -            | Polyclonal | AB_2492288  | 1 : 200  |
| Alexa Fluor 647 Donkey anti Goat       | Jackson Immuno Research, 705-605-003 | -            | Polyclonal | AB_2340436  | 1 : 200  |
| Alexa Fluor 647 Donkey anti Guinea Pig | Jackson Immuno Research, 706-605-148 | -            | Polyclonal | AB_2340476  | 1 : 200  |



Supplementary Table S6. List of primers for qRT-PCR analysis

| Gene               | Forward (5' -> 3')      | Reverse (5' -> 3')      |
|--------------------|-------------------------|-------------------------|
| Gsx1               | CTTCCCTCCCTTCGGATCG     | GTCCACAGAGATGCAGTGAAA   |
| Cd68               | GGACCCACAACCTGCACTCAT   | AAGCCCCACTTTAGCTTTACC   |
| Iltgam             | ATGGACGCTGATGGCAATACC   | TCCCCATTCACGTCTCCCA     |
| Cd86               | TGTTTCCGTGGAGACGCAAG    | TTGAGCCTTTGTAAATGGGCA   |
| Il1b               | GCAACTGTTCCCTGAACTCAACT | ATCTTTTGGGGTCCGTCAACT   |
| Tnf                | CCTGTAGCCCACGTCGTAG     | GGGAGTAGACAAGGTACAACCC  |
| Ki67 (Mki67)       | ATCATTGACCGCTCCTTTAGGT  | GCTCGCCTTGATGGTTCCT     |
| Nestin             | CCCTGAAGTCGAGGAGCTG     | CTGCTGCACCTCTAAGCGA     |
| NeuN<br>(Hrnbp3)   | AACCACGAACTCCACCCTTC    | GACCTCAATTTTCCGTCCCTC   |
| vGlut<br>(Slc17a6) | TGGAAAATCCCTCGGACAGAT   | CATAGCGGAGCCTTCTTCTCA   |
| Th                 | GTCTCAGAGCAGGATACCAAGC  | CTCTCCTCGAATACCACAGCC   |
| Tph1               | AACAAAGACCATTCTCCGAAAG  | TGTAACAGGCTCACATGATTCTC |
| Chat               | CCATTGTGAAGCGGTTTGGG    | GCCAGGCGGTTGTTTAGATACA  |
| Gfap               | CGGAGACGCATCACCTCTG     | AGGGAGTGGAGGAGTCATTCG   |
| Lcn2               | GCAGGTGGTACGTTGTGGG     | CTCTTGTAGCTCATAGATGGTGC |
| Serpina3n          | ATTTGTCCAATGTCTGCGAA    | TGGCTATCTTGGCTATAAAGGGG |
| Notch1             | CCCTTGCTCTGCCTAACGC     | GGAGTCCTGGCATCGTTGG     |
| Nrarp              | AAGCTGTTGGTCAAGTTCGGA   | CGCACACCGAGGTAGTTGG     |
| Jag1               | CCTCGGGTCAGTTTGAAGCTG   | CCTTGAGGCACACTTTGAAGTA  |
| Jag2               | CACTGTCCGTCAGGATGGAAC   | TAGCCGCCAATCAGGTTTTTTG  |
| Dll1               | CCCATCCGATTCCCCTTCG     | GGTTTTCTGTTGCGAGGTCATC  |
| Hes1               | TCAGCGAGTGCATGAACGAG    | CATGGCGTTGATCTGGGTCA    |
| Cdh1               | CAGGTCTCCTCATGGCTTTGC   | CTTCCGAAAAGAAGGCTGTCC   |
| Bmpr1a             | TGCAAGGATTCACCGAAAGC    | TGCCATCAAAGAACGGACCTAT  |
| Col6a2             | GCTCCTGATTGGGGACTCT     | CCAACACGAAATACACGTTGAC  |
| Ctnna1             | AAGTCTGGAGATTAGGACTCTGG | ACGGCCTCTCTTTTTATTAGACG |
| Ntng1              | TGCTAAACACAGTCATTTGCGT  | GCACACATTCTCATCGTCCAG   |
| Syn1               | AGCTCAACAAATCCCAGTCTCT  | CGGATGGTCTCAGCTTTCAC    |

**Supplementary Videos.** Open field locomotor behavior observation of the sham; SCI+Ctrl, and SCI+Gsx1 animals, related to [Figure 6H](#).
