# Supplementary material for: Gsx1 promotes locomotor functional recovery after spinal cord injury
Source: PubMed Central journal article supplement — Mol Ther. 2021 Apr 23;29(8):2469–82. doi: 10.1016/j.ymthe.2021.04.027 (PMC8353206; doi:10.1016/j.ymthe.2021.04.027), 2021-04-23
Supplement: mmc8.pdf [file mmc8.pdf]

# Gsx1 promotes locomotor functional recovery after spinal cord injury

Misaal Patel,<sup>1</sup> Ying Li,<sup>1,4</sup> Jeremy Anderson,<sup>1</sup> Sofia Castro-Pedrido,<sup>1</sup> Ryan Skinner,<sup>1</sup> Shun Yao Lei,<sup>1</sup> Zachary Finkel,<sup>1</sup> Brianna Rodriguez,<sup>1</sup> Fatima Esteban,<sup>1</sup> Ki-Bum Lee,<sup>1,2</sup> Yi Lisa Lyu,<sup>3,5</sup> and Li Cai<sup>1</sup>

<sup>1</sup>Department of Biomedical Engineering, Rutgers University, 599 Taylor Road, Piscataway, NJ 08854, USA; <sup>2</sup>Department of Chemistry and Chemical Biology, Rutgers University, 123 Bevier Road, Piscataway, NJ 08854, USA; <sup>3</sup>Department of Pharmacology, Rutgers-Robert Wood Johnson Medical School, 675 Hoes Lane, Piscataway, NJ 08854, USA

**Promoting residential cells, particularly endogenous neural stem and progenitor cells (NSPCs), for tissue regeneration represents a potential strategy for the treatment of spinal cord injury (SCI). However, adult NSPCs differentiate mainly into glial cells and contribute to glial scar formation at the site of injury. Gsx1 is known to regulate the generation of excitatory and inhibitory interneurons during embryonic development of the spinal cord. In this study, we show that lentivirus-mediated expression of Gsx1 increases the number of NSPCs in a mouse model of lateral hemisection SCI during the acute stage. Subsequently, Gsx1 expression increases the generation of glutamatergic and cholinergic interneurons and decreases the generation of GABAergic interneurons in the chronic stage of SCI. Importantly, Gsx1 reduces reactive astrogliosis and glial scar formation, promotes serotonin (5-HT) neuronal activity, and improves the locomotor function of the injured mice. Moreover, RNA sequencing (RNA-seq) analysis reveals that Gsx1-induced transcriptome regulation correlates with NSPC signaling, NSPC activation, neuronal differentiation, and inhibition of astrogliosis and scar formation. Collectively, our study provides molecular insights for Gsx1-mediated functional recovery and identifies the potential of Gsx1 gene therapy for injuries in the spinal cord and possibly other parts of the central nervous system.**

## INTRODUCTION

To restore function after spinal cord injury (SCI), it is essential to repair and reconstruct the damaged local circuitry. Major hurdles in neural regeneration include a limited level of neurogenesis in the adult spinal cord and an inflammatory microenvironment that inhibits neurogenesis, axon regeneration, neuronal relay formation, and myelination at the injury site.<sup>1,2</sup> Endogenous neural stem and progenitor cells (NSPCs) that reside around the central canal in the ependymal region provide a potential cell source for damage repair and regeneration.<sup>3–5</sup> In general, it is thought that resident NSPCs have a limited contribution to cell replacement. Studies have shown that ependyma is not a major source of endogenous NSPCs nor does it provide neuroprotective astrocytes after SCI,<sup>6,7</sup> however, several other studies implicate that ependymal cells are resident NSPCs and can contribute to axon remyelination and stimulate

functional recovery.<sup>8,9</sup> SCI is known to activate NSPCs and differentiate mainly into astrocytes and oligodendrocytes.<sup>5,10,11</sup> Cell transplantation approaches using exogenous NSPCs have been tested; however, issues related to immunogenicity, integration, efficacy, and safety present significant challenges for the treatment of SCI.<sup>12</sup> Studies have reported that residential glial cells can be reprogrammed into neurons by forced expression of neurogenic transcription factors, e.g., Sox2 or NeuroD1, in the injured brain and spinal cord, but they led to limited or no functional improvement.<sup>13</sup> A more recent study has demonstrated that reprogramming of residential NG2 glial progenitors promotes adult neurogenesis and functional improvement following SCI.<sup>14</sup> It has also been shown that astrocytes become reactive and produce chondroitin sulfate proteoglycans (CSPGs), which result in permanent functional deficits.<sup>15</sup> Thus, the attenuation of glial scar formation represents a potential strategy to promote axonal regeneration and functional recovery.<sup>16–18</sup> Furthermore, SCI induces over-inhibition by the GABAergic interneurons, rendering neurons spared from injury non-functional.<sup>19,20</sup> Studies have demonstrated that by reducing the excitability of inhibitory interneurons or re-establishing the excitation-inhibition homeostasis, the dormant relay pathways can be reactivated after SCI and lead to improved locomotor function.<sup>21</sup> Therefore, identifying an innovative method to promote neurogenesis, reduce glial scarring, and control excitation-inhibition homeostasis is thus fundamental to the development of an effective SCI therapy.

Many transcription factors play essential roles in neurogenesis during the embryonic development of the spinal cord.<sup>22</sup> Among these factors, genomic screened homeobox 1 (Gsx1 or Gsh1) and NK6 homeobox 1

Received 26 August 2020; accepted 16 April 2021;  
<https://doi.org/10.1016/j.ymthe.2021.04.027>.

<sup>4</sup>Present address: Department of Physiology and Pathophysiology, Xi'an Jiaotong University School of Basic Medical Sciences, Shaanxi Engineering and Research Center of Vaccine, Key Laboratory of Environment and Genes Related to Diseases of Education Ministry of China, Xi'an, Shaanxi 710000, China

<sup>5</sup>Present address: Innovation Ventures, Rutgers University, 33 Knightsbridge Road, Piscataway, NJ 08854, USA

**Correspondence:** Li Cai, PhD, Department of Biomedical Engineering, Rutgers University, 599 Taylor Road, Piscataway, NJ 08854, USA.

**E-mail:** [lcai@rutgers.edu](mailto:lcai@rutgers.edu)

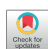

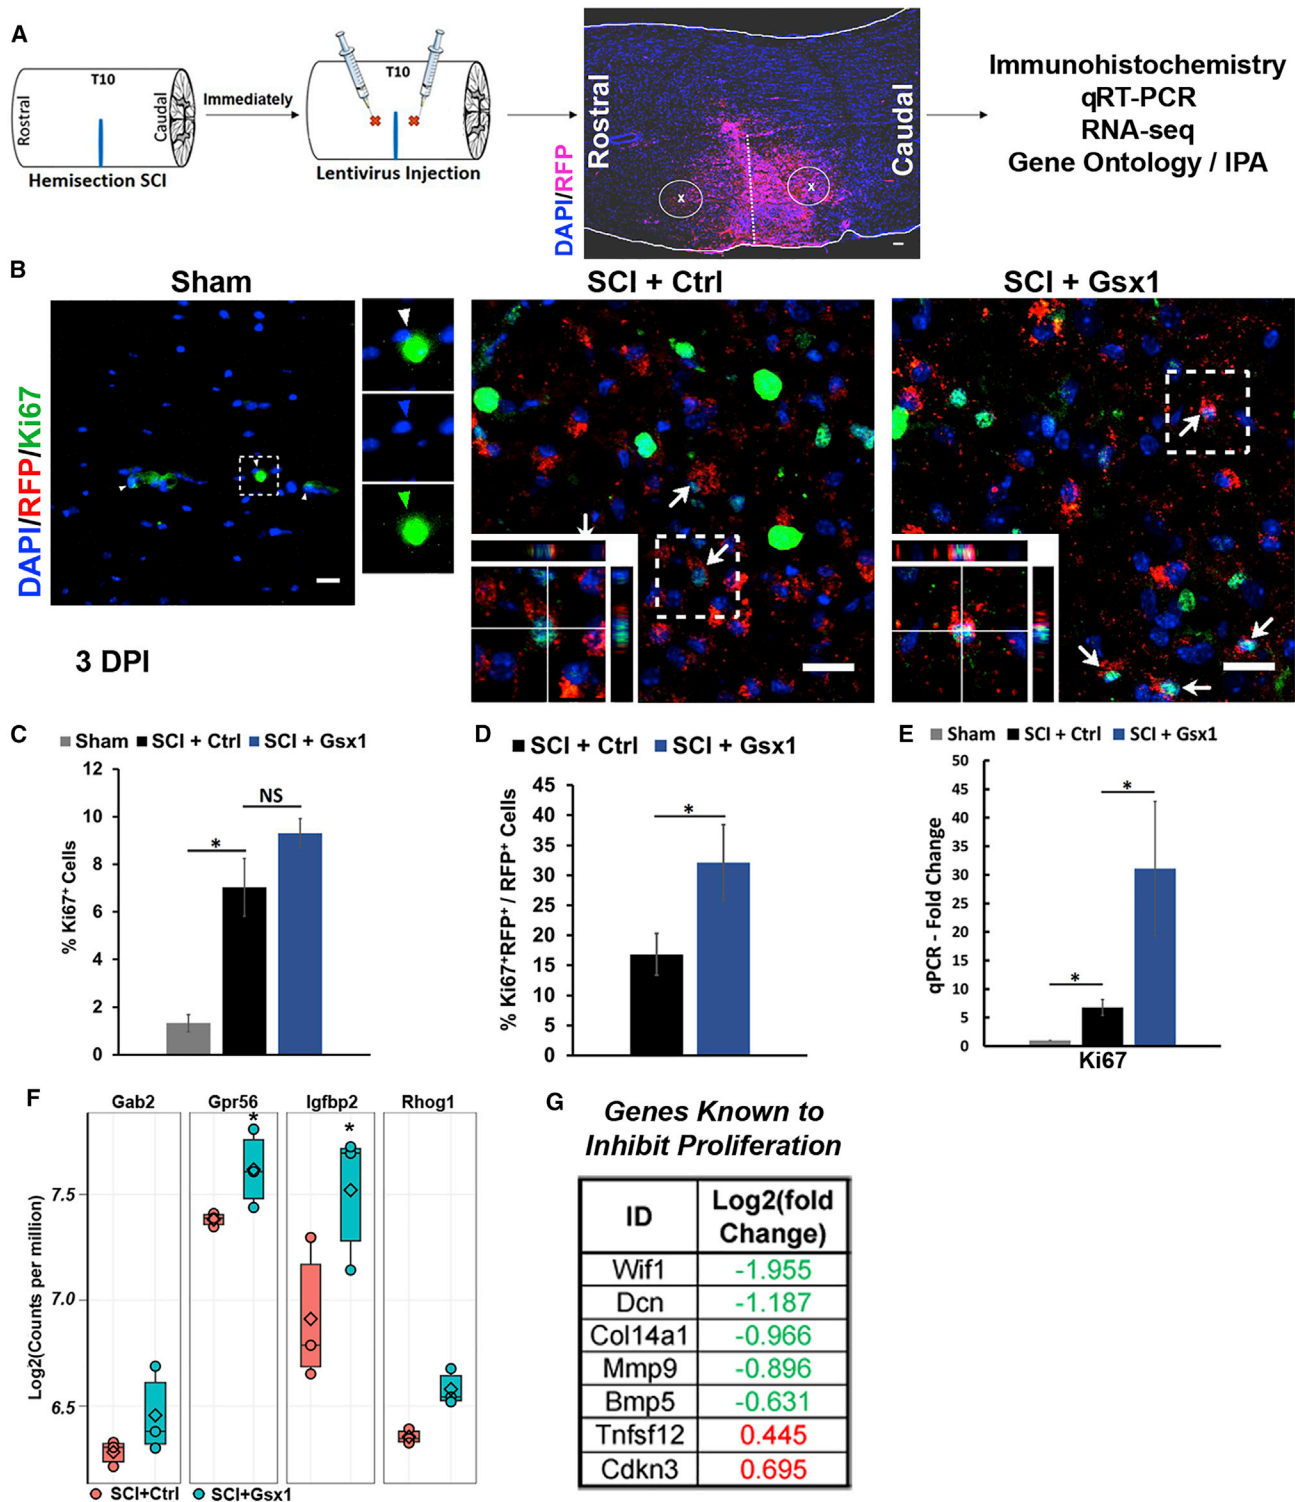

**Figure 1. Gsx1 expression promotes cell proliferation in the injured spinal cord**

(A) Lateral hemisection SCI was performed on 8- to 12-week-old mice at the T9–T10 level immediately followed by the injection of lentivirus encoding Gsx1 along with RFP reporter (lenti-Gsx1-RFP). Lentivirus encoding only the reporter RFP was used as a control (lenti-Ctrl-RFP). Spinal cord tissues were analyzed by immunohistochemistry, RNA-seq, Ingenuity Pathway Analysis (IPA), and quantitative real-time PCR analysis. Scale bar, 100  $\mu$ m. (B) Confocal images of sagittal sections of spinal cord tissue at 3 DPI

(legend continued on next page)

(Nkx6.1) are known to regulate the proliferation and differentiation of interneuron progenitors.<sup>23,24</sup> Gsx1 and its homolog Gsx2 are expressed in NSPCs and control the choice between excitatory and inhibitory cell fates of the interneurons in the developing spinal cord.<sup>24–26</sup> In addition, studies have shown that Gsx2 maintains progenitors of the lateral ganglionic eminence in an undifferentiated state, whereas Gsx1 promotes progenitor maturation and the acquisition of neuronal phenotypes, indicating that Gsx factors control the balance between proliferation and differentiation in the neuronal progenitor pool.<sup>26</sup> Furthermore, our previous studies have established that Gsx1 and Nkx6.1 factors bind to a Notch1 enhancer and regulate the expression of Notch1 during the embryonic development of the brain and spinal cord.<sup>27,28</sup> Gsx1 expression is typically low or nondetectable in the adult spinal cord.<sup>29</sup> We thus hypothesize that reactivating Gsx1 expression in the adult injured spinal cord promotes neurogenesis and generation of interneurons important for the re-establishment of local neural circuits and functional recovery after injury.

In this study, a lentiviral vector was used to transduce Gsx1 to cells at the lesion site in a mouse model of SCI. Interestingly, we found that forced Gsx1 expression promotes cell proliferation and increases the number of NSPCs at the injury site during the acute stage of injury. In the chronic stage, Gsx1 increases the number of glutamatergic and cholinergic neurons and decreases the number of GABAergic interneurons. Importantly, Gsx1 expression attenuates glial scar formation and dramatically improves locomotor function in the injured mice. Transcriptome analysis by RNA sequencing (RNA-seq) reveals that Gsx1 induces signaling pathways associated with NSPCs (e.g., Notch and Wnt signaling pathways) and inhibits gene expression associated with reactive and scar-forming astrocytes. Taken together, our study provides molecular insights for Gsx1-mediated functional recovery after SCI and identifies the use of Gsx1 expression as a potential treatment for injuries in the spinal cord and possibly other parts of the central nervous system (CNS).

## RESULTS

### Lentivirus-mediated expression of Gsx1 in a mouse model of SCI

Given the important role of Gsx1 during embryonic development of the spinal cord, we hypothesized that the upregulation of Gsx1 expression in the adult injured spinal cord promotes neural regeneration. We thus performed a lateral hemisection from the midline to the left side of the spinal cord at the thoracic (T) 9–10 level. This injury model was chosen for the following reasons: (1) it simulates an injury more likely to be seen clinically than complete transection and allows for comparison between injured and healthy tissue in the same animal; (2) it is suitable for the examination of locomotor function and recovery in different spinal tracts or to compare deficits

in function of contralateral and ipsilateral lesions; (3) the model is also suitable for the investigation of gene therapy and nerve grafting, a potentially promising surgical treatment for SCI; and (4) hemisection results in a less severe injury than contusion or complete transection. The completeness and consistency of the lateral hemisection SCI was confirmed by the observation of paralysis in the left hindlimb. Immediately after the SCI, lentivirus (~1  $\mu$ L/site of  $1 \times 10^8$  transducing units [TU]/mL) encoding Gsx1 and a reporter red fluorescent protein (RFP) (lenti-Gsx1-RFP) were injected into the injured spinal cord, approximately 1 mm rostral and caudal to the injury site (Figure 1A). Lentivirus encoding only the RFP reporter (lenti-Ctrl-RFP) was used as a control. The cytomegalovirus (CMV) immediate-early enhancer and promoter were chosen to drive the expression of Gsx1 in the spinal cord. CMV is a strong promoter and is commonly used to drive gene expression in a variety of cells in the spinal cord, including stem cells.<sup>30,31</sup> We assigned animals randomly into the following three groups (6–12 mice/group): (1) sham (exposing the spinal cord without injury); (2) injured mice with an injection of lenti-Ctrl-RFP (SCI+Ctrl); and (3) injured mice with an injection of lenti-Gsx1-RFP (SCI+Gsx1). We confirmed that the lentivirus-mediated Gsx1 expression in the spinal cord tissue at 3 days post-injury (DPI) and 7 DPI by immunohistochemistry and quantitative real-time PCR. Lentivirus injection significantly increased Gsx1 expression in virus-transduced cells, i.e., RFP<sup>+</sup> cells (Figures S1A–S1D). In addition, we performed immunohistochemistry analysis on virally transduced cells and determined their neuronal versus glial identity using antibodies specific to neurons (NeuN, Figure S1F) and astrocytes (GFAP, Figure S1G) at 3 DPI. No significant differences in the percentages of co-labeled cells (RFP<sup>+</sup>/NeuN<sup>+</sup> or RFP<sup>+</sup>/GFAP<sup>+</sup>) were detected between the SCI+Ctrl or SCI+Gsx1 groups (Figure S1H), indicating that the Gsx1 encoding virus does not preferentially infect the mature neuronal or astrocyte cell population.

### Gsx1 promotes cell proliferation in the injured spinal cord

SCI is known to induce cell proliferation at the lesion site.<sup>32</sup> To determine whether Gsx1 enhances injury-induced cell proliferation, we examined the expression of a cell proliferation marker Ki67 at 3 DPI by immunohistochemistry followed by confocal imaging analysis (Figure 1B). The RFP<sup>+</sup> and Ki67<sup>+</sup> cells were found to be located around the injection sites. The number of Ki67<sup>+</sup> cells and DAPI<sup>+</sup> cells was manually counted in the control and experimental groups, that is, sham (n = 3), SCI+Ctrl (n = 6), and SCI+Gsx1 (n = 6). We observed a significant increase in the percentage of Ki67<sup>+</sup> cells in both of the injury groups that received a viral injection as compared to the sham mice, with the highest increase found in the SCI+Gsx1 group (Figure 1C). When the percentage of Ki67<sup>+</sup>/RFP<sup>+</sup> co-labeled cells among RFP<sup>+</sup> cells was calculated, this percentage was significantly

show the expression of the viral reporter RFP and cell proliferation marker Ki67 (n = 3 for sham and n = 6 for SCI+Ctrl and SCI+Gsx1). Arrows indicate Ki67<sup>+</sup>/RFP<sup>+</sup> co-labeled cells. Images in the bottom left corner show a higher magnification z stack view of the area denoted by a dashed white box. Scale bars, 20  $\mu$ m. (C and D) Quantification of all Ki67<sup>+</sup> cells and Ki67<sup>+</sup>/RFP<sup>+</sup> cells. (E) Quantitative real-time PCR analysis of Ki67 mRNA expression at 3 DPI, normalized to the sham group; n = 4. Mean  $\pm$  SEM. \*p < 0.05 by Student's t test (D) and one-way ANOVA followed by a Tukey post hoc test (C and E). (F) Box plot of genes known to promote cell proliferation (n = 3). Each dot represents the gene expression as log<sub>2</sub>(count per million) for one biological replicate sample. (G) List of differentially expressed genes that are known to inhibit cell proliferation between SCI+Gsx1 and SCI+Ctrl groups by RNA-seq analysis (n = 3).



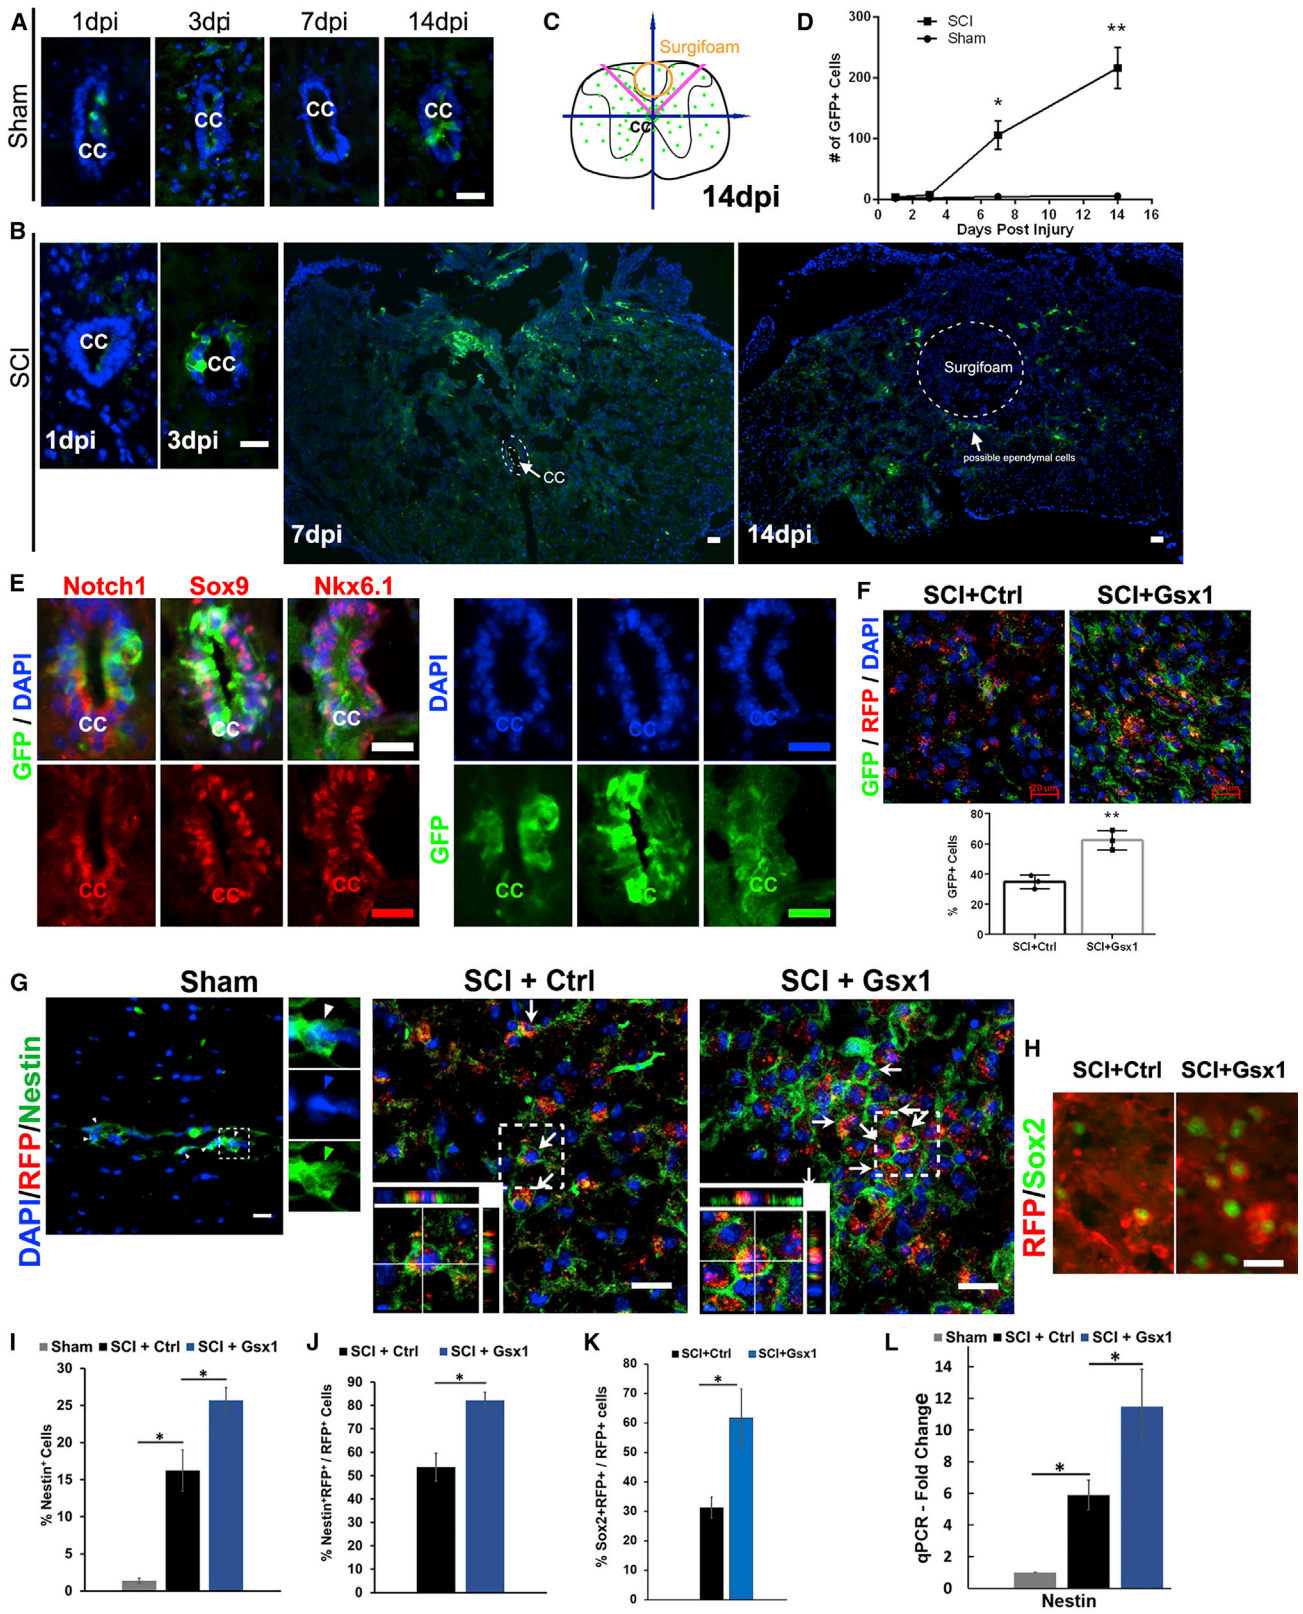

(legend on next page)



higher in the SCI+Gsx1 group than in the SCI+Ctrl group at 3 DPI (Figure 1D). Furthermore, the increase in Ki67 mRNA expression was validated by quantitative real-time PCR. A significantly higher level of Ki67 mRNA was detected in the SCI+Gsx1 group as compared to the SCI+Ctrl and sham groups (~4-fold increase; Figure 1E).

The transcriptome analysis using RNA-seq was performed to identify genes and pathways induced by Gsx1 expression. We found 475, 1,447, and 3,946 differentially expressed genes (DEGs) between the SCI+Ctrl and SCI+Gsx1 groups at 3, 14, and 35 DPI, respectively (Figure S2). Gene enrichment analysis of the top 40 DEGs at 3 DPI using REVIGO<sup>33</sup> revealed that Gsx1 upregulated developmental processes, e.g., cell proliferation and differentiation (Table S1; Figures S3A and S3D). REVIGO is a web application that summarizes lists of Gene Ontology (GO) terms by finding a representative subset of the terms using a simple clustering algorithm that relies on semantic similarity measures. Gsx1 expression upregulated genes known to promote cell proliferation (e.g., *Gab2*, *Gpr56*, *Igfbp2*, *Rhog*; Figure 1F) and downregulated genes known to inhibit cell proliferation (e.g., *Wif1*, *Dcn*, *Mmp9*; Figure 1G). To determine the effect of Gsx1 expression on cell proliferation in the uninjured spinal cord, we also perform viral injection in the sham groups. We noticed a significantly increased percentage of Ki67<sup>+</sup>/RFP<sup>+</sup> co-labeled cells among RFP<sup>+</sup> cells in the sham+Gsx1 group as compared to the sham+Ctrl group (Figure S4). These data suggest that Gsx1 expression enhances cell proliferation in the adult spinal cord without or with injury.

### Gsx1 increases the number of NSPCs in the injured spinal cord

Our previous studies have shown that the reporter GFP labels NSPCs that preferentially differentiate into interneurons in Notch1CR2-GFP transgenic mice during embryonic development.<sup>27,28</sup> Furthermore, the adult endogenous NSPCs exist in quiescent states under normal conditions and they become activated after injury.<sup>11,34</sup> Thus, we used the Notch1CR2-GFP transgenic mouse model to examine the behavior of NSPCs in the injured spinal cord. We found that the transection injury significantly increased GFP<sup>+</sup> cells at 7 and 14 DPI as compared to the sham group (n = 3 for each time point, Figures 2A–2D). In the sham group, only a few GFP<sup>+</sup> cells were detected in the ependymal region around the central canal (Figure 2A), a region known to contain NSPCs in the spinal cord. In contrast, SCI significantly increased the number of GFP<sup>+</sup> cells. These cells were found mainly in the dorsal half of the spinal cord at 3 and 7 DPI. By 14 DPI, an increasing number

of GFP<sup>+</sup> cells spread throughout the entire spinal cord (Figures 2B–2D). Injury-induced GFP<sup>+</sup> cells were co-labeled with Notch1, Sox9, and Nkx6.1 at 3 DPI (Figure 2E), indicating that they were NSPCs. We next examined the effect of Gsx1 expression on GFP<sup>+</sup> cells in Notch1CR2-GFP mice after SCI. Compared with the SCI+Ctrl group (~35% of GFP<sup>+</sup> cells; n = 3), Gsx1 expression significantly increased the percentage of GFP<sup>+</sup> cells among RFP<sup>+</sup> cells at 7 DPI (~62%; n = 3, p = 0.0038; Figure 2F). These results suggest that Gsx1 expression enhanced NSPC activation and further increased the number of NSPCs in the injured spinal cord.

The effect of Gsx1 expression on NSPCs in the injured spinal cord was further examined in C57BL/6J mice with additional markers, Nestin and Sox2, at 3 DPI. Confocal imaging analysis identified Nestin<sup>+</sup> (Figure 2G) and Sox2<sup>+</sup> (Figure 2H) cells around the injury and injection sites. Compared to the sham group, a significantly increased percentage of Nestin<sup>+</sup> and Sox2<sup>+</sup> cells was found at the lesion site in the SCI groups (SCI+Ctrl and SCI+Gsx1), with the highest increase in the SCI+Gsx1 group (Figure 2I). A significantly higher percentage of Nestin<sup>+</sup>/RFP<sup>+</sup> co-labeled cells among RFP<sup>+</sup> cells was found in the SCI+Gsx1 group as compared to the SCI+Ctrl group (Figure 2J). Similarly, a significantly higher percentage of Sox2<sup>+</sup>/RFP<sup>+</sup> cells among RFP<sup>+</sup> cells was found in the SCI+Gsx1 group (Figure 2K). The quantitative real-time PCR analysis confirmed that Gsx1 expression significantly increased Nestin mRNA expression as compared to the SCI+Ctrl and sham groups (Figure 2L). To determine the effect of Gsx1 expression on NSPCs in the uninjured spinal cord, we also perform viral injection in the sham groups. We noticed a significantly increased percentage of Nestin<sup>+</sup>/RFP<sup>+</sup> co-labeled cells among RFP<sup>+</sup> cells in the sham+Gsx1 group as compared to the sham+Ctrl group (Figure S5), indicating that Gsx1 expression can also activate endogenous adult NSPCs without injury.

### Gsx1 upregulates signaling pathways associated with NSPCs

Many signaling pathways play essential roles in the maintenance of adult NSPCs.<sup>35–38</sup> We next explored the effect of Gsx1 expression on genes associated with NSPC signaling pathways. RNA-seq and Ingenuity Pathway Analysis (IPA) analysis revealed the upregulation of Notch, Nanog, and Wnt signaling pathways (see Tables S1, S2, and S3). We then performed immunohistochemistry analysis using the anti-Notch1 antibody. A significant increase in the number of Notch1<sup>+</sup>/RFP<sup>+</sup> co-labeled cells among RFP<sup>+</sup> cells was observed in the SCI+Gsx1 group as compared to the SCI+Ctrl group at 3 DPI

### Figure 2. Gsx1 increases the number of NSPCs after SCI

Full transection spinal cord injury (Tx) was performed on Notch1CR2-GFP transgenic mice at the T9–T10 level. (A) Fluorescence images of the cross-section through the central canal (CC) at the T9–10 level of the spinal cord from the sham groups show GFP<sup>+</sup> cells at 1, 3, 7 and 14 DPI. Only a few GFP<sup>+</sup> cells can be detected in the ependymal cell population lining the wall of the CC. (B) The location of GFP<sup>+</sup> cells near the ependymal region at 1, 3, 7, and 14 DPI in the Tx animals. (C) A schematic shows the distribution of GFP<sup>+</sup> cells. (D) Quantification of the number of GFP<sup>+</sup> cells in the sham and SCI groups (n = 3 for all time points). (E) GFP<sup>+</sup> ependymal cells co-labeled with Notch1, Sox9, and Nkx6.1. GFP, DAPI, and cell markers are also shown in separate channels. (F) Lentivirus injection was performed in transgenic animals with lateral hemisection SCI. Immunofluorescence analysis of the spinal cord sections shows that Gsx1 expression increased the percentage of GFP<sup>+</sup> cells among virally transduced cells (RFP<sup>+</sup>) (n = 3). (G and H) Representative images of sagittal sections of spinal cord tissues show the expression of viral reporter RFP and the NSPC marker Nestin (G) and Sox2 (H) at 3 DPI (n = 3 for the sham group and n = 6 for the SCI+Ctrl and SCI+Gsx1). Arrows indicate Nestin<sup>+</sup>/RFP<sup>+</sup> co-labeled cells. Images in the bottom left corner show a higher magnification z stack view of the area denoted by a dashed white box. (I–K) Quantification of all Nestin<sup>+</sup> cells (I), Nestin<sup>+</sup>/RFP<sup>+</sup> co-labeled cells (J), and Sox2<sup>+</sup>/RFP<sup>+</sup> co-labeled cells (K). (L) Quantitative real-time PCR analysis shows Nestin mRNA expression at 3 DPI, normalized to the sham group; n = 4. Mean ± SEM. \*p < 0.05 by a Student's t test (F, J, and K) and one-way ANOVA followed by a Tukey post hoc test (D, I, and L). Scale bars, 50 μm (A–E) and 20 μm (F and G).

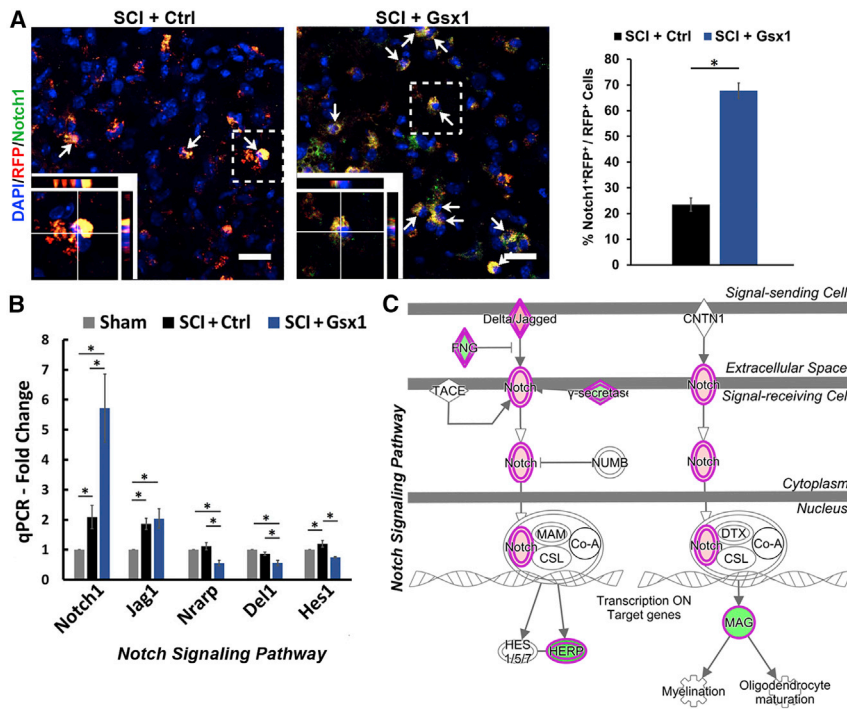

**Figure 3. Gsx1 upregulates Notch signaling in the acute stage of SCI**

(A) Representative confocal images of sagittal sections through the T9–10 spinal cord at 3 DPI show the expression of viral reporter RFP and NSPC marker Notch1 ( $n = 4$  for SCI+Ctrl and SCI+Gsx1). Arrows indicate Notch1<sup>+</sup>/RFP<sup>+</sup> co-labeled cells. Images in the bottom left corner show a higher magnification z stack view of the area denoted by a dashed white box. Scale bars, 20  $\mu$ m. The quantification of Notch1<sup>+</sup> cells among RFP<sup>+</sup> cells is shown in a histogram on the right. (B) A histogram shows the quantitative real-time PCR analysis of the genes involved in the Notch signaling pathway (Notch1, Jag1, Nrarp, Del1, and Hes1). Mean  $\pm$  SEM. \* $p < 0.05$  by a Student's *t* test (A) and one-way ANOVA followed by a Tukey post hoc test (B). (C) Diagram depicts the upregulated Notch signaling pathway by Gsx1 expression revealed by IPA.

NSPC differentiation after SCI, we examined spinal cord tissues at 14 DPI with an early neuronal marker doublecortin (DCX), an astrocyte marker GFAP, and an oligodendrocyte progenitor marker PDGFR $\alpha$  in the SCI+Ctrl ( $n = 6$ ) and SCI+Gsx1 ( $n = 6$ ) groups. Compared to the control group (SCI+Ctrl), Gsx1 expression significantly increased the percentage of DCX<sup>+</sup>/RFP<sup>+</sup>

(Figure 3A). A further increase in mRNA expression of Notch1 and Jag1 (a ligand for the Notch1 receptor) was found in the SCI+Gsx1 group as compared to the sham and SCI+Ctrl groups (Figure 3B). In contrast, Nrarp was downregulated in the SCI+Gsx1 group (Figure 3B). Nrarp is a negative regulator of the Notch signaling pathway that physically interacts with the Notch intracellular domain (NICD) and blocks Notch transcription.<sup>39,40</sup> Furthermore, compared to the control treatment, Gsx1 expression decreased the mRNA levels of Del1 and Hes1 (Figure 3B), key components in Notch signaling. The RNA-seq and IPA revealed the upregulation of the Notch signaling pathway (Figure 3C), including increased expression of Hes7 and Rbpj (Figure S6A). The RNA-seq analysis also revealed the genes known to positively and negative regulate NSPCs (Figures S6B and S6C). In addition, there was an increased expression of genes associated with activation of the Nanog signaling pathway, e.g., Akt2, Map2k2, Pik3cd, and Pik3cg, and NSPC genes Rap2, Sox11, and Tyk2 at 3 DPI (Figure S6D). In contrast, Notch/Nanog signaling pathways were not detected at 35 DPI by RNA-seq and IPA (Figures S2 and S3). Furthermore, RNA-seq analysis and quantitative real-time PCR also revealed the upregulation of Wnt signaling pathways at 3, 14, and 35 DPI (Figure S7). These results support the notion that Gsx1 expression transiently activates/enhances signaling pathways involved in NSPCs, e.g., Notch, Nanog, and Wnt signaling pathways, after SCI.

#### Gsx1 induces specific types of interneurons in the injured spinal cord

In the adult spinal cord, injury-activated NSPCs mostly generate astrocytes and oligodendrocytes.<sup>5,11</sup> To investigate the role of Gsx1 in

co-labeled cells (Figure 4A) and decreased the percentage of GFAP<sup>+</sup>/RFP<sup>+</sup> (Figure 4B) and PDGFR $\alpha$ <sup>+</sup>/RFP<sup>+</sup> (Figure 4C) co-labeled cells among RFP<sup>+</sup> cells. There was no significant difference in the number of oligodendrocytes (Olig2<sup>+</sup>/RFP<sup>+</sup> cells) between the SCI+Ctrl and SCI+Gsx1 groups (Figure S8). These results suggest that Gsx1 expression skewed NSPC differentiation toward the neuronal over the glial lineage during the chronic stage of SCI. The upregulation of DCX (Figure 4D) and the downregulation of GFAP (Figure 4E) and PDGFR $\alpha$  (Figure 4F) in the SCI+Gsx1 group at 35 DPI was confirmed by RNA-seq analysis. GO analysis of DEGs at 14 and 35 DPI revealed that enrichment of Gsx1 induced DEGs involved in CNS development, neurogenesis, cell differentiation, neuronal projection, and synapse organization (Table S4; Figures S2 and S3). The identity of virally infected cells was further examined at 56 DPI using a mature neuronal marker NeuN (Figure 4G), a glutamatergic interneuron marker vGlut2 (Figure 4H), a cholinergic neuronal marker ChAT (Figure 4I), and a GABAergic interneuron marker GABA (Figure 4J). Gsx1 expression significantly increased the percentage of NeuN<sup>+</sup>, ChAT<sup>+</sup>, and vGlut2<sup>+</sup> cells and decreased the percentage of GABA<sup>+</sup> cells among RFP<sup>+</sup> cells ( $n = 4$ ) as compared to the SCI+Ctrl group ( $n = 4$ ). The quantitative real-time PCR analysis detected a significantly increased mRNA level of vGlut (or Slc17a6) and ChAT in the SCI+Gsx1 group ( $n = 4$ ) as compared to the sham ( $n = 4$ ) and SCI+Ctrl ( $n = 4$ ) groups at 35 DPI (Figure 4K). These results indicate that Gsx1 expression preferentially increased the number of excitatory glutamatergic and cholinergic interneurons and decreased the number of inhibitory GABAergic interneurons in the injured spinal cord.

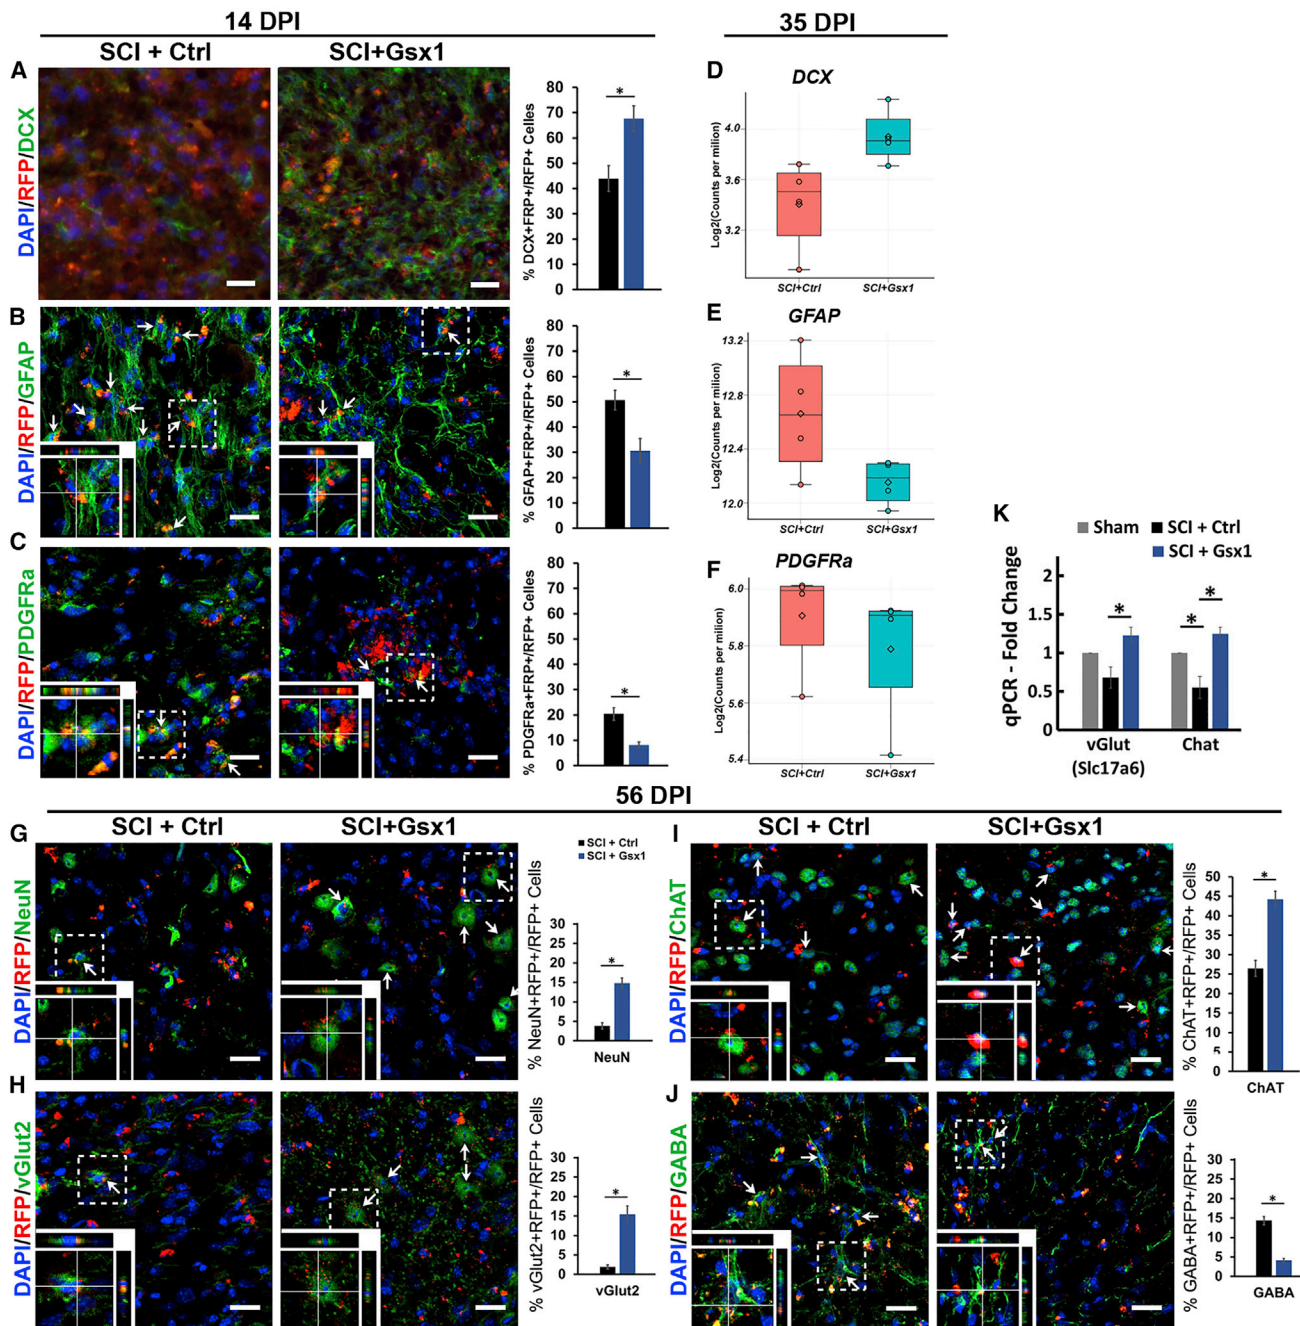

**Figure 4. Gsx1 affects the generation of specific types of interneurons in the injured spinal cord**

(A–C) Confocal images of sagittal sections of spinal cord tissues at 14 DPI show the expression of the viral reporter RFP and early neuronal marker doublecortin (DCX) (A), astrocyte marker GFAP (B), and oligodendrocyte progenitor marker PDGFRa (C). Arrows indicate cell marker<sup>+</sup>/RFP<sup>+</sup> co-labeled cells. Images in the bottom left corner show a higher magnification z stack view of the area denoted by a dashed white box. Scale bars, 20  $\mu$ m. (D–F) Quantification of virally transduced cells co-labeled with DCX, GFAP, or PDGFRa (n = 3). Gene expression box plots of DCX (D), GFAP (E), and PDGFRa (F) at 35 DPI between SCI+Ctrl and SCI+Gsx1 groups. Each dot represents the gene expression as log<sub>2</sub>(count per million) for one biological replicate sample. Mean  $\pm$  SEM. \*p < 0.05 by Student's t test. (G–J) Confocal images of sagittal sections of spinal cord tissues at 56 DPI show the expression of viral reporter RFP and a mature neuron marker NeuN (G), glutamatergic neuron marker vGlut2 (H), cholinergic neuron marker ChAT (I), and GABAergic neuron marker GABA (J) with quantification (n = 4). Images in the bottom left corner show a higher magnification z stack view of the area denoted by a dashed white box. Scale bars, 20  $\mu$ m. (K) Quantitative real-time PCR analysis shows vGlut and Chat mRNA expression at 35 DPI, normalized to the sham group; n = 3. Mean  $\pm$  SEM \*p < 0.05 by one-way ANOVA followed by a Tukey post hoc test.



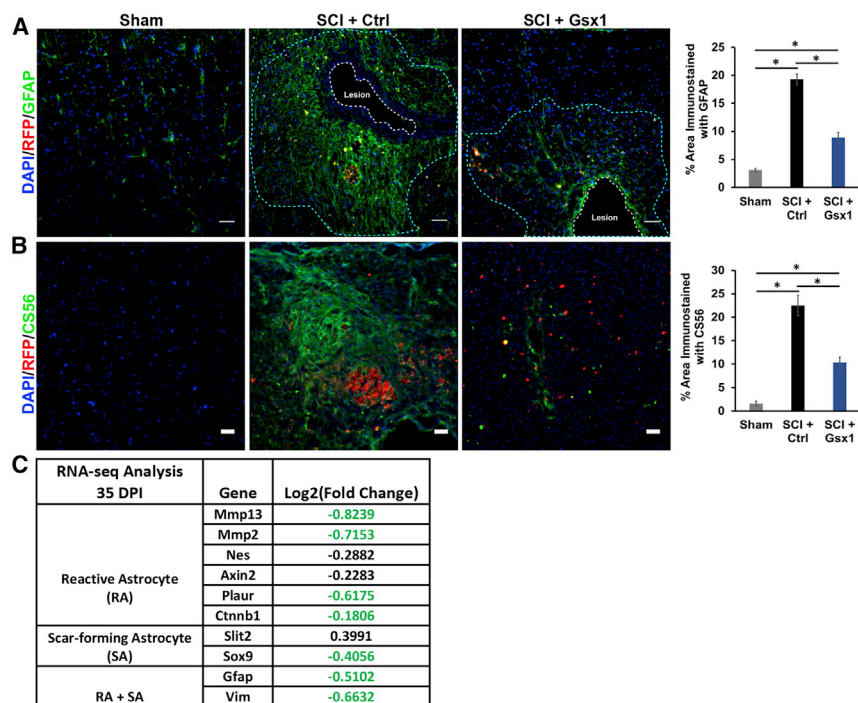

**Figure 5. Gsx1 attenuates astrogliosis and glial scar formation**

(A and B) Representative fluorescence images of sagittal sections through the lesion site in the spinal cord at 56 DPI show the expression of viral reporter RFP, GFAP (A), and chondroitin sulfate proteoglycan (CSPG, stained with CS56) (B), and the quantification of the immunostained area with anti-GFAP and anti-CS56 around the injury site is shown on the right. Scale bars, 50  $\mu$ m.  $n = 4$  for sham and  $n = 6$  for SCI+Ctrl and SCI+Gsx1 groups. Mean  $\pm$  SEM. \* $p < 0.05$  by one-way ANOVA followed by a Tukey post hoc test. (C) A partial list of genes associated with reactive astrocytes (RAs) and scar-forming astrocytes (SAs) identified by RNA-seq analysis. Fold change in green font indicates statistical significance.

(Figure S10). This result further supports Gsx1 function in neural differentiation and is consistent with the known function of Gsx1 in regulating neural differentiation during embryonic spinal cord development.<sup>24</sup>

#### Gsx1 promotes 5-HT neuronal activity and improves locomotor function after SCI

Neurotransmission of serotonin (5-HT) in the spinal cord is required for modulating sensory, motor, and autonomic functions, and positive

5-HT staining is associated with neuronal activity.<sup>45</sup> After SCI, 5-HT-positive axons caudal to the injury site degenerate, while rostral to the injury site they sprout.<sup>46,47</sup> Thus, we examined the 5-HT immunoreactivity in spinal cord tissues isolated at 35 DPI. In the sham group ( $n = 3$ ), the 5-HT-labeled axons were detected continuously through the T9–T10 region of the spinal cord (Figure 6A). However, in the SCI+Ctrl group ( $n = 3$ ), the 5-HT-labeled axons were detected rostrally but not caudally to the injury site (Figures 6A and S11; white dotted line indicates the hemisection site). In contrast, the 5-HT-labeled axons in the SCI+Gsx1 group ( $n = 3$ ) extended caudally to the injury site (Figures 6A and S11). This result suggests that Gsx1 expression promotes axon sprouting and growth after SCI. To determine the molecular basis for Gsx1-induced axon sprouting/growth, we examined the expression of a selected set of genes involved in axon growth and synaptogenesis. Gsx1 expression ( $n = 4$ ) significantly increased mRNA level of Ctnna1 and Col6a2 as compared to the SCI+Ctrl group ( $n = 4$ ) at 35 DPI (Figures 6B and 6C) by quantitative real-time PCR analysis. The RNA-seq analysis and GO analysis revealed that Gsx1 expression led to an upregulation of genes known to promote synaptogenesis (Figure 6D) and a downregulation of genes known to inhibit synaptogenesis (Figure 6E). In addition, Gsx1 expression upregulated genes associated with axonal guidance pathways (Figure 6F). Finally, we assessed the effect of Gsx1 expression on locomotor behavior using an open-field locomotion test starting from the day before the injury ( $-1$  DPI) to 56 DPI (8 weeks). For each mouse, a Basso Mouse Scale (BMS) score<sup>48</sup> was assigned double-blindly by three observers. BMS scores range from 0 (complete paralysis and no ankle movement) to 9 (normal walking).<sup>48</sup> All mice with a

#### Gsx1 attenuates glial scar formation

As Gsx1 affected neural differentiation and reduced the number of glial cells, we next examined whether Gsx1 affects glial scar formation. Immunofluorescence analysis was performed on spinal cord tissues using GFAP as a marker for reactive astrocytes and CSPG as a marker for glial scar formation. Gsx1 expression significantly reduced the GFAP and CS56 immunostained area around the lesion site in the SCI+Gsx1 group as compared to the SCI+Ctrl group (Figures 5A and 5B). The RNA-seq analysis showed a downregulation of genes associated with reactive astrocytes (e.g., Mmp13, Mmp2, Nes, Axin2, Slit2, Plaur, and Ctnnb1), scar-forming astrocytes (e.g., Slit2 and Sox9), and both reactive and scar-forming astrocytes (e.g., GFAP and Vim)<sup>41</sup> at 35 DPI (Figure 5C). In addition, we examined the effect of Gsx1 expression on glial scar formation in the uninjured spinal cord (sham group). Although the viral injection itself increased the GFAP immunostained area at the injection site (compared to the sham alone group), no significant difference was noticed in the immunostained area for GFAP or CS56 between the sham+Gsx1 and sham+Ctrl groups (Figure S9). These results suggest that Gsx1 represses reactive and scar-forming astrocytes and attenuates glial scar formation after SCI.

In addition, we have performed cell culture experiments using the NE-4C cell line, a neural ectoderm-derived neural stem cell line<sup>42–44</sup> with lenti-Gsx1 transduction. We observed that there was a significantly increased number of Map2<sup>+</sup> neurons and reduced number of GFAP<sup>+</sup> astrocytes in the cultured NE-4C cells 14 days after lenti-Gsx1 transduction as compared to the lenti-Ctrl group

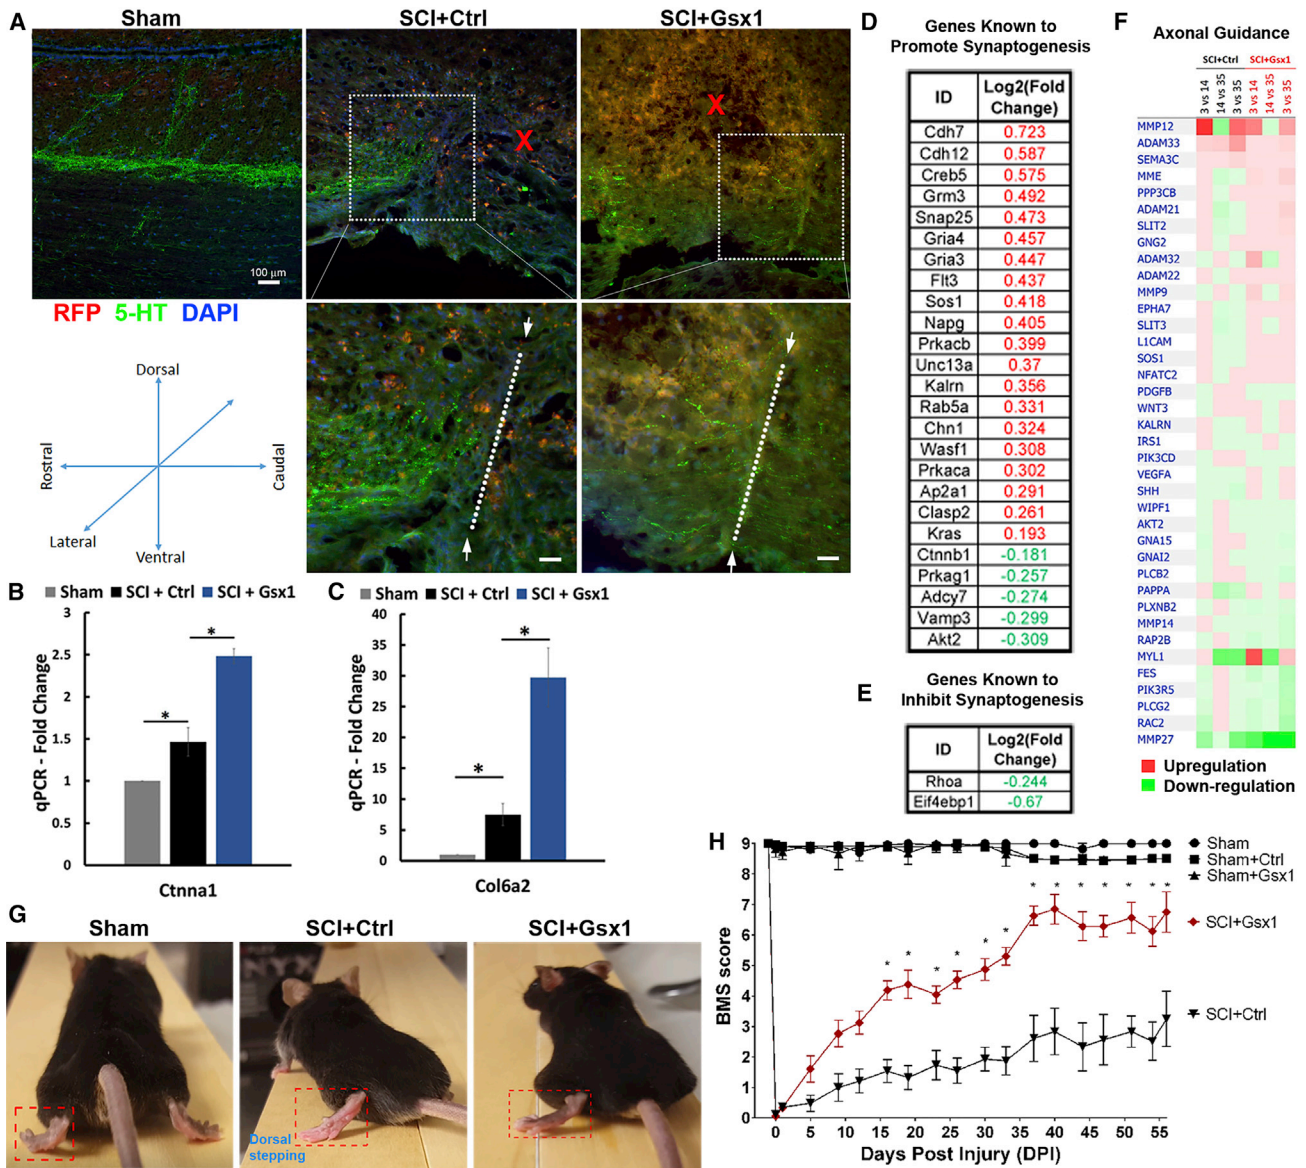

**Figure 6. Gsx1 promotes 5-HT neuronal activity and improves locomotor function after SCI**

(A) Sagittal sections of the spinal cord through the T9–T10 level show 5-HT staining at 35 DPI. The boxed region is shown in a higher magnification. The white dotted line indicates the hemisection site. “X” indicates sites of viral injection. (B and C) Quantitative real-time PCR analysis of differentially expressed genes (Ctnna1 and Col6a2) involved in axon guidance at 35 DPI (n = 4; two-way ANOVA analysis followed by a post hoc test). (D and E) Partial list of Gsx1-induced differentially expressed genes involved in synaptogenesis. (F) Heatmap shows genes involved in axonal guidance from RNA-seq analysis and IPA comparing among 3, 14, and 35 DPI groups (n ≥ 3). Mean ± SEM. \*p < 0.05 by Student’s t test. Red color indicates gene upregulation and green indicates downregulation. (G and H) Representative images of walking posture at 56 DPI (G) and a plot of the BMS scores (H) of left hindlimb over 56 DPI (n = 6 for all data points and groups, except the SCI+Gsx1 group, for which n = 12). \*p < 0.05 by a two-way repeated measures ANOVA followed by a Tukey post hoc test.

lateral hemisection SCI at the T9–10 level exhibited paralysis in the left hindlimb, while the sham, sham+Ctrl, and sham+Gsx1 animal groups displayed a normal locomotor behavior with a BMS score of ~9 from –1 to 56 DPI (Figures 6G and 6H). Mice with SCI (both SCI+Ctrl and SCI+Gsx1 groups) exhibited paralysis in the left hindlimb with a BMS score of 0 on the day of hemisection injury

(0 DPI) (Figures 6G and 6H; Videos S1, S2, and S3), confirming lateral hemisection-induced SCI. For mice in the SCI+Ctrl group (n = 6), the BMS scores gradually improved to ~3 (dorsal stepping) by 56 DPI. In contrast, mice in the SCI+Gsx1 group (n = 12) demonstrated profoundly improved locomotor function with the BMS scores around 6–7 by 42 DPI and the scores maintained above 6 until the end of

the tests (Figure 6H). The BMS scores for the SCI+Gsx1 group increased significantly higher than did those of the SCI+Ctrl group starting at 16 DPI (Figure 6H; \* $p < 0.05$ ). These results demonstrated that Gsx1 expression significantly improved locomotor functional recovery after SCI.

## DISCUSSION

Limited neurogenesis, neurite growth, increased reactive astrogliosis, and scar formation are the major hurdles for neural regeneration and functional recovery after SCI.<sup>1,2</sup> In this study, we show that exogenous Gsx1 expression increases the number of NSPCs and the generation of specific subtypes of interneurons, i.e., vGlut2<sup>+</sup> and ChAT<sup>+</sup> interneurons, and 5-HT neuronal activity, and it reduces the number of inhibitory GABAergic neurons. Moreover, Gsx1 attenuates reactive astrogliosis and glial scar formation, and it promotes locomotor functional recovery in mice with SCI.

It has been shown that transcription factors, including Sox2, Oct4, Klf4, and NeuroD1, can reprogram the endogenous glial cells into neurons or NSPCs. However, these approaches largely led to limited or no functional recovery after SCI.<sup>14,49–51</sup> The failure of reprogrammed neurons to elicit functional recovery may be attributed to the following reasons: (1) low reprogramming efficiency, which resulted in an insufficient number of functional neurons; (2) Oct4, Sox2, and NeuroD1 are general neurogenic factors, which may not be capable of inducing specific neuronal types required for recovering from SCI, e.g., Sox2-induced neurons resemble GABAergic interneurons<sup>50</sup> (in fact, the induction of additional inhibitory interneurons might have caused a further imbalance of the excitation/inhibition homeostasis); and (3) functional recovery may require the generation of various specific cell types. In the current study, we have shown that Gsx1 promoted the generation of glutamatergic and cholinergic interneurons, and reduced the generation of GABAergic interneurons. These spinal interneurons have been demonstrated to be essential for transmitting both motor and sensory impulses.<sup>52,53</sup> Furthermore, reducing the excitability of spinal cord inhibitory interneurons enhances functional recovery in mice with SCI.<sup>21</sup> It is thus possible that Gsx1-induced functional recovery was partially due to the reduced inhibitory GABAergic interneurons and increased excitatory glutamatergic and cholinergic interneurons. This is also consistent with the established role of Gsx1 to control the generation of excitatory and inhibitory interneurons during embryonic development of the spinal cord.<sup>24</sup> Thus, by affecting interneuron subpopulations, Gsx1 contributes to the restoration of the excitation/inhibition homeostasis in the injured spinal cord.

Previous studies have demonstrated that resident astrocytes can be reprogrammed into neurons using astrocyte-specific GFAP promoter, but a significant functional recovery has generally not been reported.<sup>49,50,54</sup> Thus, we used a strong ubiquitous CMV promoter to drive Gsx1 expression and target all possible cell types in the injured spinal cord. The observation that Gsx1 expression led to increased cell proliferation (with an increased number of Ki67<sup>+</sup>/RFP<sup>+</sup> cells) suggests that Gsx1 mainly affects the NSPC population. This role of Gsx1 in

NSPCs was further demonstrated in the Notch1CR2-GFP transgenic SCI model, in which the reporter GFP-labeled cells are NSPCs and committed to become interneurons.<sup>27,28</sup>

Injury to the brain and spinal cord leads to NSPC activation.<sup>55</sup> The observation that Gsx1 expression leads to a further increase in the number of GFP<sup>+</sup> NSPCs during acute stage of injury implicates a role of Gsx1 in NSPC activation and proliferation. The finding of similar levels of Ki67<sup>+</sup> cells and Nestin<sup>+</sup> cells in the sham+Gsx1 and SCI+Ctrl groups (Figures S4 and S5) further confirms such a role of Gsx1. This is also supported by RNA-seq analysis that Gsx1-induced genes were involved in cell proliferation. Further pathway analysis reveals that Gsx1 upregulates NSPC signaling pathways, including Notch, Nanog, and Wnt signaling. Studies have established a role for Gsx1 in the regulation of Notch signaling for neuronal differentiation.<sup>27,28,56</sup> Although our data strongly indicate that Gsx1 induces NSPC differentiation into functional interneurons, we cannot rule out the possibility that Gsx1 can reprogram residential glial cells into neurons or promote survival of the neurons at the lesion site. Future cell-lineage tracing experiments using a cell-specific promoter for targeted expression of Gsx1 in glial cells or NSPCs are needed to determine the origin of Gsx1-induced neurons.

SCI causes activation of microglia and astrocytes, which leads to reactive astrogliosis and glial scar formation.<sup>15,57,58</sup> The glial scar is mostly composed of reactive astrocytes, non-neuronal cells (e.g., pericytes and meningeal cells), and proteoglycan-rich extracellular matrix (ECM).<sup>41,59,60</sup> Activated astrocytes secrete CSPG, which constitutes the major component of the glial scar.<sup>61</sup> Inhibition of CSPG represents an important therapeutic strategy for achieving functional recovery after SCI. The observation that Gsx1 reduces reactive astrogliosis and thus glial scar formation is well correlated with functional recovery after SCI; such a role for Gsx1 has not been reported. In fact, the adult NSPCs give rise to mainly astrocytes after CNS injury.<sup>62,63</sup> Gsx1 expression significantly decreases the expression of genes associated with reactive astrocytes and scar-forming astrocytes. It is likely that Gsx1 induces the generation of neurons at the expense of the astrocyte lineage, and thus reduced astrogliosis leads to the attenuation of scar formation during the chronic stage of SCI. A recent study has shown that the overexpression of Oct4 and Klf4 led to reduced glial scar formation and improved motor function after SCI.<sup>51</sup> Thus, neurogenic factors may generally have the potential to suppress astrogliosis and scar formation in the injured spinal cord. However, an effective therapeutic strategy for SCI may also require specific subtypes of spinal cord interneurons for maintaining excitatory/inhibitory homeostasis.

In summary, we have demonstrated that lentivirus-mediated Gsx1 expression in the injured spinal cord is sufficient to reduce glial scarring, increase neurogenesis of specific interneurons, and promote neuronal activity and locomotion function after SCI. These findings unveil Gsx1 gene therapy as a promising treatment for injuries to the spinal cord and perhaps other parts of the CNS.



## MATERIALS AND METHODS

### Animals

Young adult (8- to 12-week-old) mice (Notch1CR2-GFP transgenic<sup>27,28</sup> and C57BL/6J, Jackson Laboratory, 000664) were used in this study. All of the proposed animal work was conducted under compliance with the Institutional Animal Care and Use Committee (IACUC) at Rutgers University. All animals were housed in an animal care facility with a 12-h light/12-h dark cycle. Mice under each experimental condition were assigned randomly with an equal number of male and female mice when possible.

### Lentivirus production

Lentiviruses encoding Gsx1 and a reporter RFP (lenti-Gsx1-RFP) and control lentiviruses (encoding only the reporter RFP, lenti-Ctrl-RFP) (ABM, LV465366 and LV084) were generated by transfecting human embryonic kidney (HEK)293T cells with a mixture of target vector (lenti-Gsx1-RFP or lenti-Ctrl-RFP), envelope plasmids (pMD2.G/VSVG, Addgene, 12259), and third-generation packaging plasmids (pMDLg/pRRE, Addgene, 12251 and pRSV-Rev, Addgene, 12253). HEK293T cells were cultured in high-glucose Dulbecco's modified Eagle's medium (DMEM) supplemented with 10% fetal bovine serum (FBS), 1% nonessential amino acids (MEM NEAAs 100×, Life Technology, 11140050), and 1% GlutaMAX I 100× (Life Technology 35050061). Transfection of the HEK293T cells was performed when the culture reached ~50%–60% confluency. Virus-containing supernatant was collected at day 2 and day 4 after transfection. Viruses were concentrated by precipitating the virus supernatant by the polyethylene glycol 6000 (PEG6000) method. Viral titer was determined by infecting HEK293T cells.

### Hemisection SCI and lentivirus injection

For hemisection SCI and lentiviral injections, mice were first anesthetized with 5% isoflurane inhalation for 3–4 min and then maintained at 2.5% isoflurane for the remainder of the surgery. Next, the skin was disinfected with betadine scrub and 70% ethanol wipes. Laminectomy was performed around T9–T10 to expose the spinal cord. Next, local anesthesia (0.125% Marcaine [bupivacaine hydrochloride]) was applied and dorsal blood vessels were burned using a cauterizer. Then, a lateral cut was made to the left side of the spinal cord and the cut ends at the midline of the spinal cord for hemisection SCI. Immediately after the injury, ~1–2  $\mu\text{L}$  of virus ( $1 \times 10^8$  TU/mL) was injected approximately 1 mm rostral and caudal to the lesion epicenter (~0.5 mm in depth). Injection was performed using a 10- $\mu\text{L}$  Hamilton syringe with a 32G needle mounted on a micromanipulator and moved as little as a micrometer at a time. The virus was injected at approximately 1  $\mu\text{L}/\text{min}$  and the needle was left in place for 2–3 min to allow diffusion and prevent leakage or backflow. Injection volume has an error of  $\pm 0.1$   $\mu\text{L}$ . For the sham animals, the skin and muscle were cut to expose the spinal cord, but no injury was introduced. Muscles were sutured, and the skin was stapled back together. Immediately after surgery, 1 mg/kg meloxicam, a pain killer, and 50 mg/kg cefazoline, an antibiotic, were administered subcutaneously.

Animals were divided into the following three groups (6–12 mice/group): (1) sham mice (exposed the spine without injury, sham); (2) SCI mice with an injection of lenti-control-RFP (SCI+Ctrl); and (3) SCI mice with an injection of lenti-Gsx1-RFP (SCI+Gsx1).

### Behavioral/locomotor assessment

Locomotion of each animal was evaluated based on the BMS from an open-field test.<sup>48</sup> The BMS scale ranges from 0 (completely paralyzed) to 9 (normal). The BMS score assessment was given after 2–3 min of observation per animal by three independent observers who were blinded to the type of treatment. The BMS assessment was performed once before the surgery and then twice a week for up to 56 DPI.

### Tissue processing

Spinal cord tissues at 3, 7, 14, 35, and 56 DPI were harvested after intracardial perfusion with  $1 \times$  phosphate-buffered saline (PBS) followed by 4% (w/v) paraformaldehyde (PFA), and then micro-surgically dissected and fixed overnight (18–24 h) in 4% PFA on a rotor. Fixed spinal cord tissues were washed three times with  $1 \times$  PBS for 30 min and then placed in 30% (w/v) sucrose overnight until tissue sank to the bottom. Next, tissues were cryopreserved by embedding in Tissue-Tek optimum cutting temperature (OCT) and stored at  $-80^\circ\text{C}$  until needed. Sagittal or cross-sections (12- $\mu\text{m}$  thickness) were generated using a cryostat (Thermo Scientific).

### Immunohistochemistry

Immunostaining was performed following a previously established protocol with minor modifications.<sup>27</sup> Briefly, sections were treated with cold methanol for 10 min at room temperature for fixation and antigen retrieval. All antibodies were diluted in blocking solution containing 0.05% Triton X-100, 2% donkey serum, 3% bovine serum albumin (BSA), and PBS ( $1 \times$ ) (pH 7.4). Sections were incubated with primary antibodies (Table S5) overnight at  $4^\circ\text{C}$  and washed three times for 10 min with PBS, and then incubated with secondary antibodies (Table S5) for 1 h at room temperature and washed three times for 10 min with PBS. For nuclear staining, 4',6-diamidino-2-phenylindole (DAPI; 200 ng/mL) was added and then samples were washed three times with PBS and sealed with CytoSeal 60 (Thermo Fisher Scientific, 8310-4).

### Imaging and image analysis

At least five sections from each slide/animal were analyzed. Images were captured at the same exposure and threshold, and at the same intensity per condition using a Zeiss LSM 800 confocal microscope or Zeiss AxioVision imager A1. The automatic cell counter in ImageJ<sup>64</sup> was used to count the total number of cells. Co-labeled cells with cell type-specific markers and viral marker RFP were counted manually using ImageJ in separate RGB channels and with the following stereological considerations: (1) systematic and random sampling; (2) calculation of total cell numbers instead of signal densities; (3) counting of cells, not cell profiles; and (4) specific staining to clearly identify the cells of interest.

### RNA extraction and quality control

Spinal cord tissues of 3, 14, and 35 DPI ( $n \geq 3$  for each time point) were isolated and segments containing injured/injected parenchymal segments (spanning ~2–3 mm from each side of the lesion) were rapidly snap-frozen in liquid nitrogen. Total RNA was isolated from spinal cord tissues using the RNeasy Lipid Tissue mini kit (QIAGEN, 74804) following the manufacturer's protocol. The concentration of the total RNA was determined using a Qubit RNA broad-range (BR) assay kit (Life Technologies), and quality of the total RNA was determined using the RNA 6000 Nano chip on the 2100 Bioanalyzer automated electrophoresis system (Agilent Technologies).

### Library preparation and RNA-seq

Library preparation and RNA-seq were performed by Admera Health (South Plainfield, NJ, USA). Total RNA was used for library preparation of each sample, which was subsequently bar-coded and prepared according to the manufacturer's instructions (Illumina). The libraries were prepared using an Illumina MiSeq paired-end kit and sequenced as paired-end,  $2 \times 150$ -bp on the Illumina MiSeq. The sequencing run was performed according to the manufacturer's instructions and generated a total of 40 million reads per sample.

### RNA-seq data analysis and pathway analysis

After a quality check of the raw fastq files using FastQC,<sup>65</sup> all sequences were aligned to the mouse reference genome, mm10, with STAR version 2.0.<sup>66</sup> The raw read counts were generated using HTSeq (version 0.6.0).<sup>67</sup> DESeq2<sup>68,69</sup> (an R/Bioconductor package) was used to normalize the counts and call differential gene expression on a counts matrix generated by HTSeq. Differentially expressed transcripts/genes between Gsx1 expression and control groups were defined by statistical significance (p value) and biological relevance (fold change). Downstream pathway analysis was carried out using IPA (QIAGEN, Redwood City, CA, USA; <https://digitalinsights.qiagen.com/products/ingenuity-pathway-analysis>). Pathway identification was performed using IPA, which is built on the manually curated content of the QIAGEN Knowledge Base to help scientists understand the biological context of expression analysis experiments. Differentially expressed genes and their expression changes ( $\log_2$  fold change) were used as input. Box plots of gene expression were generated from count matrix from the HTSeq using START<sup>70</sup> and the edgeR<sup>71</sup> algorithm. Each dot on the box plot represents one biological sample.

### Quantitative real-time PCR analysis

Complementary DNA (cDNA) was synthesized from total RNA using the SuperScript III first-strand synthesis system (Invitrogen, 18080051) following the manufacturer's protocol. Quantitative real-time PCR analysis was performed with Power SYBR Green PCR master mix and gene-specific primers (Table S6) using a StepOnePlus real-time PCR system (Applied Biosystems). GAPDH was used as a reference housekeeping gene. The Levak method was used to calculate the fold change by normalizing it to the sham.

### NE4C cell culture

NE4C cells (ATCC CRL-2925) were maintained in Eagle's minimum essential medium (EMEM) with L-glutamine (ATCC 30-2003) supplemented with 10% FBS, 2 mM GlutaMAX (Gibco GlutaMAX 100 $\times$ ), and 1% penicillin-streptomycin (pen-strep) at 37°C with 5% CO<sub>2</sub>. For cell passage, subconfluent cultures were detached using TrypLE Express (GIBCO) diluted 4-fold with 1X PBS and transferred into poly-L-lysine (PLL)-coated dishes. For neural differentiation, NE-4C cells were cultured in EMEM 5% FBS with 2 mM GlutaMAX and 1% pen-strep. Retinoic acid (RA) was used to induce neuron formation. RA treatment ( $10^{-7}$  M) was added in media every other day starting 1 day after plating NE-4C cells and continuing until day 8. RA was then removed and NE4C culture was continued until day 14. Cell cultures were fixed with 4% PFA in PBS at room temperature for 15 min. Cells were then washed three times with PBS before adding blocking buffer (0.05% Triton X-100, 2% donkey serum, and 3% BSA in PBS) for 1 h at room temperature. All antibodies were diluted in PBS. Cells were incubated with primary antibodies overnight at 4°C and washed three times for 5 min with PBS. Cells were incubated with secondary antibodies for 1 h 30 min at room temperature followed by washing three times for 5 min with PBS. Cell nuclei were stained with DAPI (200 ng/mL) and mounted to coverslips with Vectashield Plus antifade mounting medium (Vector Laboratories, H-1900).

### Statistical analysis

All data were analyzed using GraphPad Prism version 6.0. Statistical significance between two conditions was calculated by a Student's t test, and multi-group comparison was performed using a one-way ANOVA, followed by a Tukey post hoc test. For BMS behavior analysis, a two-way repeated measures ANOVA was performed. Data are presented as mean  $\pm$  standard error of the mean (SEM). A p value of less than 0.05 was considered statistically significant.

### Data availability

The raw RNA-seq gene expression data described in this publication have been deposited in NCBI's Gene Expression Omnibus (GEO) and are accessible through GEO: GSE171441.

### SUPPLEMENTAL INFORMATION

Supplemental information can be found online at <https://doi.org/10.1016/j.ymthe.2021.04.027>.

### ACKNOWLEDGMENTS

We thank members of the Cai lab for constructive comments and discussion, Drs. Kelvin Kwan and Rick Cohen for advice for lentivirus production and cell culture experiments, and Catherine Cai for video editing. This work was supported by the State of New Jersey Commission on Spinal Cord Research grant 15IRG006 and Rutgers TechAdvance Fund (to L.C.); a U.S. Department of Education GAANN Precision and Personalized Medicine Pre-Doctoral Training Fellowship (to M.P.); NIH Biotechnology Pre-Doctoral Training Fellowship T32GM008339 (to M.P. and J.A.); and New Jersey Commission on Spinal Cord Research Graduate Fellowship

CSCR12FEL001 (to Y.L.). K.-B.L. acknowledges partial financial support from the NSF (CHE-1429062) and NIH (R01 1R01DC016612).

## AUTHOR CONTRIBUTIONS

L.C. and Y.L.L. conceived the idea. M.P., Y.L.L., and L.C. designed the experiments. M.P., Y.L., J.A., S.C.-P., R.S., S.L., Z.F., B.R., and F.E. performed the experiments. K.-B.L. assisted with qPCR analysis. M.P., Y.L.L., and L.C. analyzed the data and wrote the manuscript.

## DECLARATION OF INTERESTS

L.C., M.P., and Y.L.L. are listed as co-inventors in patent applications related to this work. L.C. is a founder of NeuroNovus Therapeutics Inc. and a member of the scientific advisory board. The remaining authors declare no competing interests.

## REFERENCES

- Tran, A.P., Warren, P.M., and Silver, J. (2018). The biology of regeneration failure and success after spinal cord injury. *Physiol. Rev.* 98, 881–917.
- Sofroniew, M.V. (2018). Dissecting spinal cord regeneration. *Nature* 557, 343–350.
- Lacroix, S., Hamilton, L.K., Vaugeois, A., Beaudoin, S., Breault-Dugas, C., Pineau, I., Lévesque, S.A., Grégoire, C.A., and Fernandes, K.J. (2014). Central canal ependymal cells proliferate extensively in response to traumatic spinal cord injury but not demyelinating lesions. *PLoS ONE* 9, e85916.
- McDonough, A., and Martínez-Cerdeño, V. (2012). Endogenous proliferation after spinal cord injury in animal models. *Stem Cells Int.* 2012, 387513.
- Meletis, K., Barnabé-Heider, F., Carlén, M., Evergren, E., Tomilin, N., Shupliakov, O., and Frisén, J. (2008). Spinal cord injury reveals multilineage differentiation of ependymal cells. *PLoS Biol.* 6, e182.
- Ren, Y., Ao, Y., O'Shea, T.M., Burda, J.E., Bernstein, A.M., Brumm, A.J., Muthusamy, N., Ghashghaei, H.T., Carmichael, S.T., Cheng, L., and Sofroniew, M.V. (2017). Ependymal cell contribution to scar formation after spinal cord injury is minimal, local and dependent on direct ependymal injury. *Sci. Rep.* 7, 41122.
- Paniagua-Torija, B., Norenberg, M., Arevalo-Martin, A., Carballosa-Gautam, M.M., Campos-Martin, Y., Molina-Holgado, E., and Garcia-Ovejero, D. (2018). Cells in the adult human spinal cord ependymal region do not proliferate after injury. *J. Pathol.* 246, 415–421.
- Becker, C.G., Becker, T., and Hugnot, J.P. (2018). The spinal ependymal zone as a source of endogenous repair cells across vertebrates. *Prog. Neurobiol.* 170, 67–80.
- Llorens-Bobadilla, E., Chell, J.M., Le Merre, P., Wu, Y., Zamboni, M., Bergensträhle, J., Stenudd, M., Sopova, E., Lundeberg, J., Shupliakov, O., et al. (2020). A latent lineage potential in resident neural stem cells enables spinal cord repair. *Science* 370, eabb8795.
- Barnabé-Heider, F., and Frisén, J. (2008). Stem cells for spinal cord repair. *Cell Stem Cell* 3, 16–24.
- Sabelström, H., Stenudd, M., and Frisén, J. (2014). Neural stem cells in the adult spinal cord. *Exp. Neurol.* 260, 44–49.
- Assinck, P., Duncan, G.J., Hilton, B.J., Plemel, J.R., and Tetzlaff, W. (2017). Cell transplantation therapy for spinal cord injury. *Nat. Neurosci.* 20, 637–647.
- Li, H., and Chen, G. (2016). In vivo reprogramming for CNS repair: Regenerating neurons from endogenous glial cells. *Neuron* 91, 728–738.
- Tai, W., Wu, W., Wang, L.L., Ni, H., Chen, C., Yang, J., Zang, T., Zou, Y., Xu, X.M., and Zhang, C.L. (2021). In vivo reprogramming of NG2 glia enables adult neurogenesis and functional recovery following spinal cord injury. *Cell Stem Cell*. Published online February 25, 2021.
- Silver, J., and Miller, J.H. (2004). Regeneration beyond the glial scar. *Nat. Rev. Neurosci.* 5, 146–156.
- Cafferty, W.B., Yang, S.H., Duffy, P.J., Li, S., and Strittmatter, S.M. (2007). Functional axonal regeneration through astrocytic scar genetically modified to digest chondroitin sulfate proteoglycans. *J. Neurosci.* 27, 2176–2185.
- Dias, D.O., Kim, H., Holl, D., Werne Solnestam, B., Lundeberg, J., Carlén, M., Göritz, C., and Frisén, J. (2018). Reducing pericyte-derived scarring promotes recovery after spinal cord injury. *Cell* 173, 153–165.e22.
- Griffin, J.M., Fackelmeier, B., Clemett, C.A., Fong, D.M., Mouravlev, A., Young, D., and O'Carroll, S.J. (2020). Astrocyte-selective AAV-ADAMTS4 gene therapy combined with hindlimb rehabilitation promotes functional recovery after spinal cord injury. *Exp. Neurol.* 327, 113232.
- Courtine, G., Song, B., Roy, R.R., Zhong, H., Herrmann, J.E., Ao, Y., Qi, J., Edgerton, V.R., and Sofroniew, M.V. (2008). Recovery of supraspinal control of stepping via indirect propriospinal relay connections after spinal cord injury. *Nat. Med.* 14, 69–74.
- Rosignol, S., and Frigon, A. (2011). Recovery of locomotion after spinal cord injury: Some facts and mechanisms. *Annu. Rev. Neurosci.* 34, 413–440.
- Chen, B., Li, Y., Yu, B., Zhang, Z., Brommer, B., Williams, P.R., Liu, Y., Hegarty, S.V., Zhou, S., Zhu, J., et al. (2018). Reactivation of dormant relay pathways in injured spinal cord by KCC2 manipulations. *Cell* 174, 521–535.e13.
- Lee, S.K., and Pfaff, S.L. (2001). Transcriptional networks regulating neuronal identity in the developing spinal cord. *Nat. Neurosci.* 4 (Suppl), 1183–1191.
- Zhao, X., Chen, Y., Zhu, Q., Huang, H., Teng, P., Zheng, K., Hu, X., Xie, B., Zhang, Z., Sander, M., and Qiu, M. (2014). Control of astrocyte progenitor specification, migration and maturation by Nkx6.1 homeodomain transcription factor. *PLoS ONE* 9, e109171.
- Mizuguchi, R., Kriks, S., Cordes, R., Gossler, A., Ma, Q., and Goulding, M. (2006). *Ascl1* and *Gsh1/2* control inhibitory and excitatory cell fate in spinal sensory interneurons. *Nat. Neurosci.* 9, 770–778.
- Chapman, H., Riesenberger, A., Ehrman, L.A., Kohli, V., Nardini, D., Nakafuku, M., Campbell, K., and Waclaw, R.R. (2018). Gsx transcription factors control neuronal versus glial specification in ventricular zone progenitors of the mouse lateral ganglionic eminence. *Dev. Biol.* 442, 115–126.
- Pei, Z., Wang, B., Chen, G., Nagao, M., Nakafuku, M., and Campbell, K. (2011). Homeobox genes *Gsx1* and *Gsx2* differentially regulate telencephalic progenitor maturation. *Proc. Natl. Acad. Sci. USA* 108, 1675–1680.
- Li, Y., Tzatzalos, E., Kwan, K.Y., Grumet, M., and Cai, L. (2016). Transcriptional regulation of Notch1 expression by Nkx6.1 in neural stem/progenitor cells during ventral spinal cord development. *Sci. Rep.* 6, 38665.
- Tzatzalos, E., Smith, S.M., Doh, S.T., Hao, H., Li, Y., Wu, A., Grumet, M., and Cai, L. (2012). A cis-element in the Notch1 locus is involved in the regulation of gene expression in interneuron progenitors. *Dev. Biol.* 372, 217–228.
- Chen, K., Deng, S., Lu, H., Zheng, Y., Yang, G., Kim, D., Cao, Q., and Wu, J.Q. (2013). RNA-seq characterization of spinal cord injury transcriptome in acute/subacute phases: A resource for understanding the pathology at the systems level. *PLoS ONE* 8, e72567.
- Nieuwenhuis, B., Haenzi, B., Hilton, S., Carnicer-Lombarte, A., Hobo, B., Verhaagen, J., and Fawcett, J.W. (2021). Optimization of adeno-associated viral vector-mediated transduction of the corticospinal tract: comparison of four promoters. *Gene Ther.* 28, 56–74.
- Barrow, K.M., Perez-Campo, F.M., and Ward, C.M. (2006). Use of the cytomegalovirus promoter for transient and stable transgene expression in mouse embryonic stem cells. *Methods Mol. Biol.* 329, 283–294.
- Zhao, C., Deng, W., and Gage, F.H. (2008). Mechanisms and functional implications of adult neurogenesis. *Cell* 132, 645–660.
- Supek, F., Bošnjak, M., Škunca, N., and Šmuc, T. (2011). REVIGO summarizes and visualizes long lists of gene ontology terms. *PLoS ONE* 6, e21800.
- Liu, S., and Chen, Z. (2019). Employing endogenous NSCs to promote recovery of spinal cord injury. *Stem Cells Int.* 2019, 1958631.
- Imayoshi, I., Sakamoto, M., Yamaguchi, M., Mori, K., and Kageyama, R. (2010). Essential roles of Notch signaling in maintenance of neural stem cells in developing and adult brains. *J. Neurosci.* 30, 3489–3498.
- Chavali, M., Klingener, M., Kokkosis, A.G., Garkun, Y., Felong, S., Maffei, A., and Aguirre, A. (2018). Non-canonical Wnt signaling regulates neural stem cell quiescence during homeostasis and after demyelination. *Nat. Commun.* 9, 36.
- Bengoia-Vergniory, N., and Kypta, R.M. (2015). Canonical and noncanonical Wnt signaling in neural stem/progenitor cells. *Cell. Mol. Life Sci.* 72, 4157–4172.



38. Wexler, E.M., Paucer, A., Kornblum, H.I., Palmer, T.D., and Geschwind, D.H. (2009). Endogenous Wnt signaling maintains neural progenitor cell potency. *Stem Cells* 27, 1130–1141.
39. Izon, D.J., Aster, J.C., He, Y., Weng, A., Karnell, F.G., Patriub, V., Xu, L., Bakkour, S., Rodriguez, C., Allman, D., and Pear, W.S. (2002). Deltex1 redirects lymphoid progenitors to the B cell lineage by antagonizing Notch1. *Immunity* 16, 231–243.
40. Pirot, P., van Grunsven, L.A., Marine, J.C., Huylebroeck, D., and Bellefroid, E.J. (2004). Direct regulation of the *Nrarp* gene promoter by the Notch signaling pathway. *Biochem. Biophys. Res. Commun.* 322, 526–534.
41. Hara, M., Kobayakawa, K., Ohkawa, Y., Kumamaru, H., Yokota, K., Saito, T., Kijima, K., Yoshizaki, S., Harimaya, K., Nakashima, Y., and Okada, S. (2017). Interaction of reactive astrocytes with type I collagen induces astrocytic scar formation through the integrin-N-cadherin pathway after spinal cord injury. *Nat. Med.* 23, 818–828.
42. Demeter, K., Herberth, B., Duda, E., Domonkos, A., Jaffredo, T., Herman, J.P., and Madarász, E. (2004). Fate of cloned embryonic neuroectodermal cells implanted into the adult, newborn and embryonic forebrain. *Exp. Neurol.* 188, 254–267.
43. Schlett, K., and Madarász, E. (1997). Retinoic acid induced neural differentiation in a neuroectodermal cell line immortalized by p53 deficiency. *J. Neurosci. Res.* 47, 405–415.
44. Varga, B.V., Hádinger, N., Gócza, E., Dulberg, V., Demeter, K., Madarász, E., and Herberth, B. (2008). Generation of diverse neuronal subtypes in cloned populations of stem-like cells. *BMC Dev. Biol.* 8, 89.
45. Perrin, F.E., and Noristani, H.N. (2019). Serotonergic mechanisms in spinal cord injury. *Exp. Neurol.* 318, 174–191.
46. Faden, A.I., Gannon, A., and Basbaum, A.I. (1988). Use of serotonin immunocytochemistry as a marker of injury severity after experimental spinal trauma in rats. *Brain Res.* 450, 94–100.
47. Camand, E., Morel, M.P., Faissner, A., Sotelo, C., and Dusart, I. (2004). Long-term changes in the molecular composition of the glial scar and progressive increase of serotonergic fibre sprouting after hemisection of the mouse spinal cord. *Eur. J. Neurosci.* 20, 1161–1176.
48. Basso, D.M., Fisher, L.C., Anderson, A.J., Jakeman, L.B., McTigue, D.M., and Popovich, P.G. (2006). Basso Mouse Scale for locomotion detects differences in recovery after spinal cord injury in five common mouse strains. *J. Neurotrauma* 23, 635–659.
49. Chen, W., Zhang, B., Xu, S., Lin, R., and Wang, W. (2017). Lentivirus carrying the *NeuroD1* gene promotes the conversion from glial cells into neurons in a spinal cord injury model. *Brain Res. Bull.* 135, 143–148.
50. Su, Z., Niu, W., Liu, M.L., Zou, Y., and Zhang, C.L. (2014). In vivo conversion of astrocytes to neurons in the injured adult spinal cord. *Nat. Commun.* 5, 3338.
51. Huang, X., Wang, C., Zhou, X., Wang, J., Xia, K., Yang, B., Gong, Z., Ying, L., Yu, C., Shi, K., et al. (2020). Overexpression of the transcription factors OCT4 and KLF4 improves motor function after spinal cord injury. *CNS Neurosci. Ther.* 26, 940–951.
52. Bannatyne, B.A., Hao, Z.Z., Dyer, G.M.C., Watanabe, M., Maxwell, D.J., and Berkowitz, A. (2020). Neurotransmitters and motoneuron contacts of multifunctional and behaviorally specialized turtle spinal cord interneurons. *J. Neurosci.* 40, 2680–2694.
53. Paixão, S., Loschek, L., Gaitanos, L., Alcalá Morales, P., Goulding, M., and Klein, R. (2019). Identification of spinal neurons contributing to the dorsal column projection mediating fine touch and corrective motor movements. *Neuron* 104, 749–764.e6.
54. Noristani, H.N., Sabourin, J.C., Boukhaddaoui, H., Chan-Seng, E., Gerber, Y.N., and Perrin, F.E. (2016). Spinal cord injury induces astroglial conversion towards neuronal lineage. *Mol. Neurodegener.* 11, 68.
55. Anderson, J., Patel, M., Forenzo, D., Ai, X., Cai, C., Wade, Q., Risman, R., and Cai, L. (2020). A novel mouse model for the study of endogenous neural stem and progenitor cells after traumatic brain injury. *Exp. Neurol.* 325, 113119.
56. Wang, B., Waclaw, R.R., Allen, Z.J., 2nd, Guillemot, F., and Campbell, K. (2009). *Ascl1* is a required downstream effector of *Gsx* gene function in the embryonic mouse telencephalon. *Neural Dev.* 4, 5.
57. Bovolenta, P., Wandosell, F., and Nieto-Sampedro, M. (1992). CNS glial scar tissue: a source of molecules which inhibit central neurite outgrowth. *Prog. Brain Res.* 94, 367–379.
58. Rolls, A., Shechter, R., and Schwartz, M. (2009). The bright side of the glial scar in CNS repair. *Nat. Rev. Neurosci.* 10, 235–241.
59. Göritz, C., Dias, D.O., Tomilin, N., Barbacid, M., Shupliakov, O., and Frisé, J. (2011). A pericyte origin of spinal cord scar tissue. *Science* 333, 238–242.
60. Silver, J., Schwab, M.E., and Popovich, P.G. (2014). Central nervous system regenerative failure: Role of oligodendrocytes, astrocytes, and microglia. *Cold Spring Harb. Perspect. Biol.* 7, a020602.
61. Morgenstern, D.A., Asher, R.A., and Fawcett, J.W. (2002). Chondroitin sulphate proteoglycans in the CNS injury response. *Prog. Brain Res.* 137, 313–332.
62. Faulkner, J.R., Herrmann, J.E., Woo, M.J., Tansey, K.E., Doan, N.B., and Sofroniew, M.V. (2004). Reactive astrocytes protect tissue and preserve function after spinal cord injury. *J. Neurosci.* 24, 2143–2155.
63. Benner, E.J., Luciano, D., Jo, R., Abdi, K., Paez-Gonzalez, P., Sheng, H., Warner, D.S., Liu, C., Eroglu, C., and Kuo, C.T. (2013). Protective astrogenesis from the SVZ niche after injury is controlled by Notch modulator *Thbs4*. *Nature* 497, 369–373.
64. Schneider, C.A., Rasband, W.S., and Eliceiri, K.W. (2012). NIH Image to ImageJ: 25 years of image analysis. *Nat. Methods* 9, 671–675.
65. Andrews, S. (2010). FastQC: A quality control tool for high throughput sequence data, <https://qubeshub.org/resources/fastqc>.
66. Dobin, A., Davis, C.A., Schlesinger, F., Drenkow, J., Zaleski, C., Jha, S., Batut, P., Chaisson, M., and Gingeras, T.R. (2013). STAR: Ultrafast universal RNA-seq aligner. *Bioinformatics* 29, 15–21.
67. Anders, S., Pyl, P.T., and Huber, W. (2015). HTSeq—A Python framework to work with high-throughput sequencing data. *Bioinformatics* 31, 166–169.
68. Love, M.I., Huber, W., and Anders, S. (2014). Moderated estimation of fold change and dispersion for RNA-seq data with DESeq2. *Genome Biol.* 15, 550.
69. Anders, S., and Huber, W. (2010). Differential expression analysis for sequence count data. *Genome Biol.* 11, R106.
70. Nelson, J.W., Sklenar, J., Barnes, A.P., and Minnier, J. (2017). The START App: A web-based RNAseq analysis and visualization resource. *Bioinformatics* 33, 447–449.
71. Robinson, M.D., McCarthy, D.J., and Smyth, G.K. (2010). edgeR: A Bioconductor package for differential expression analysis of digital gene expression data. *Bioinformatics* 26, 139–140.

## **Supplemental Information**

### **Gsx1 promotes locomotor functional recovery after spinal cord injury**

**Misaal Patel, Ying Li, Jeremy Anderson, Sofia Castro-Pedrido, Ryan Skinner, Shunyao Lei, Zachary Finkel, Brianna Rodriguez, Fatima Esteban, Ki-Bum Lee, Yi Lisa Lyu, and Li Cai**

## Supplemental Information

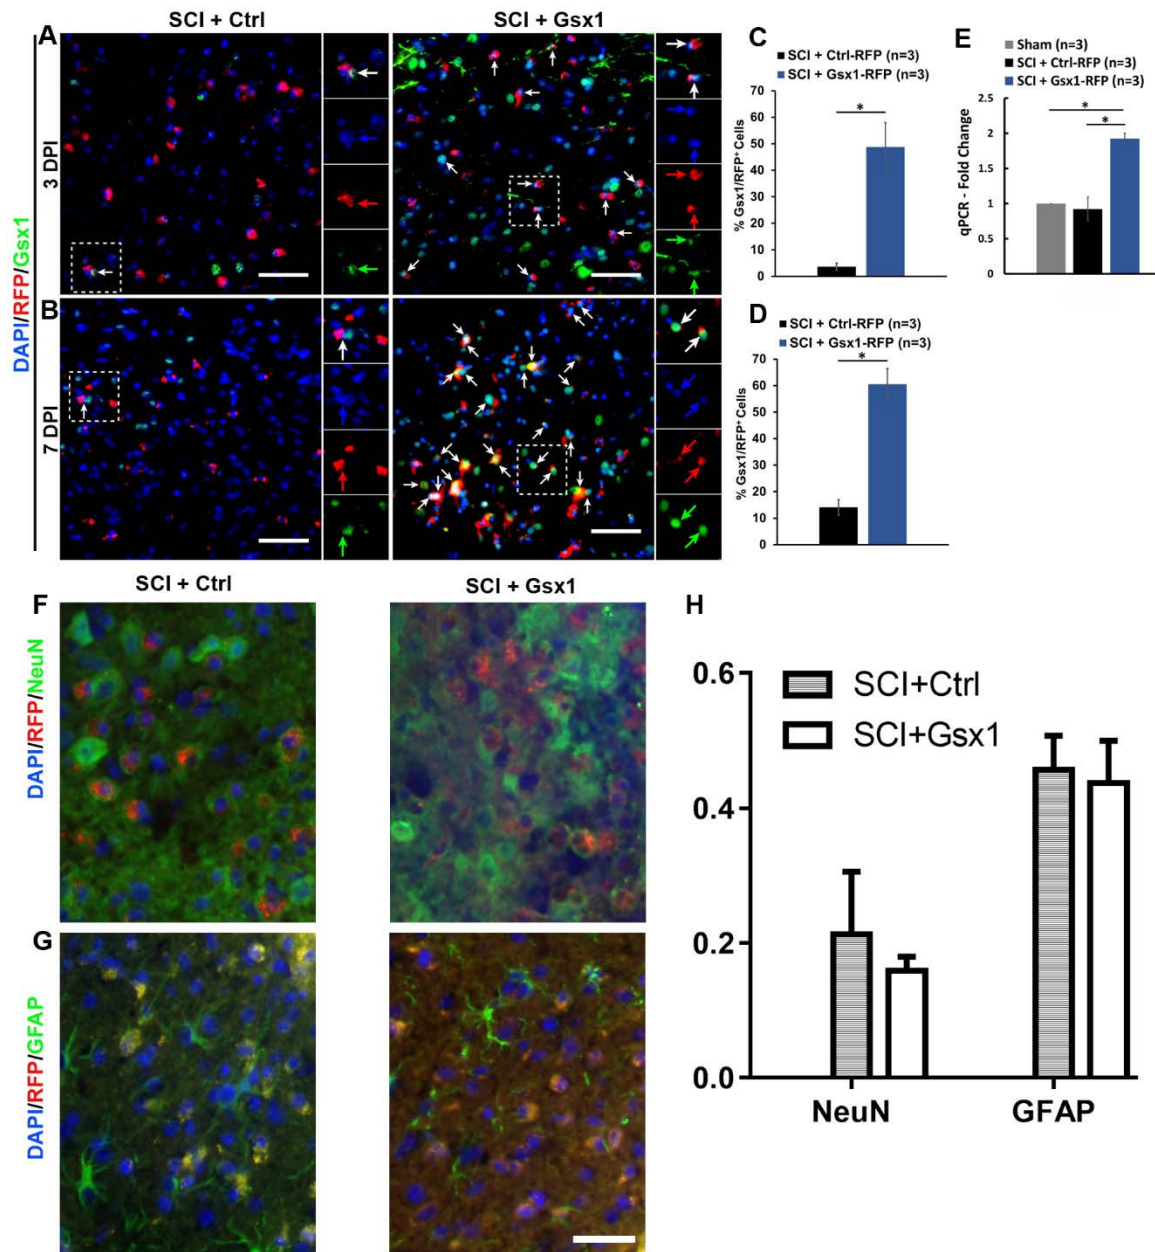

### Figure S1. Transduction of lenti-Gsx1-RFP is successful in delivering and overexpressing Gsx1 after SCI

Hemisection SCI was performed on 8-12 weeks old mice around T9-10. Immediately after lentivirus injection encoding Control (Ctrl or empty vector) or Gsx1 gene along with RFP reporter. Animals were harvested at 3 DPI (**A**) and 7 DPI (**B**). Sagittal sections were immunostained with antibodies against Gsx1 (**A** and **B**), NeuN (**F**) and GFAP (**G**). Arrows indicate co-expression of RFP and Gsx1 (green). Montage on the right of each of the image indicates small region (white box) of sagittal sections with separate channels (DAPI, RFP, and Gsx1) to indicate co-expression. Scale bars = 50  $\mu$ m. Quantification of virally transduced cells co-labeled with Gsx1 at 3 DPI (**C**) and 7 DPI (**D**). (**E**) Histograms show the RT-qPCR analysis of



Gsx1 mRNA expression at 3 DPI, normalized to the Sham. n = 3; Mean  $\pm$  SEM; \* = p < 0.05 indicates statistical significance; Students' T-test (**C-D**); one-way ANOVA and Tukey post-hoc analysis (**E**). Sections of spinal cord samples at 3 DPI were also immunostained with antibodies against NeuN (**F**) and GFAP (**G**). Quantification of virally transduced cells co-labeled with NeuN and GFAP (**H**). DPI = days post injury.

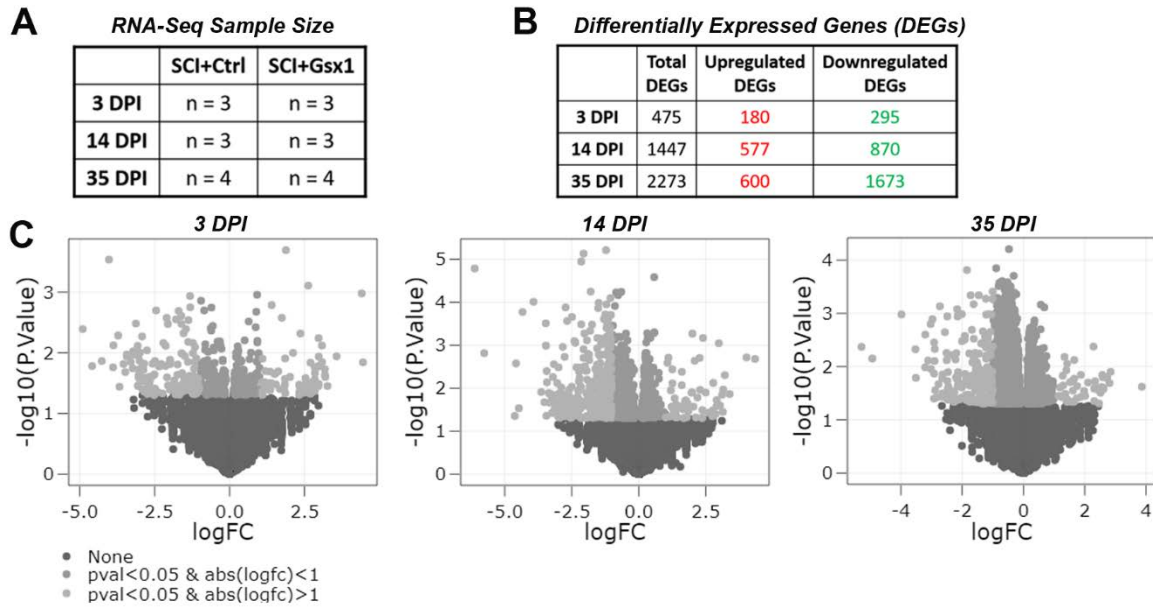

**Figure S2. Summary of RNA-seq analysis**

(A) List of the number of biological replicates used for each group (SCI+Ctrl and SCI+Gsx1) at 3, 14, and 35 DPI for RNA-seq analysis. (B) List of the total number of differentially expressed genes (DEGs;  $p < 0.05$ ) that were upregulated and downregulated at 3 DPI, 14 DPI, and 35 DPI. (C) Volcano plots depicts the differentially expressed genes at 3, 14, and 35 DPI.

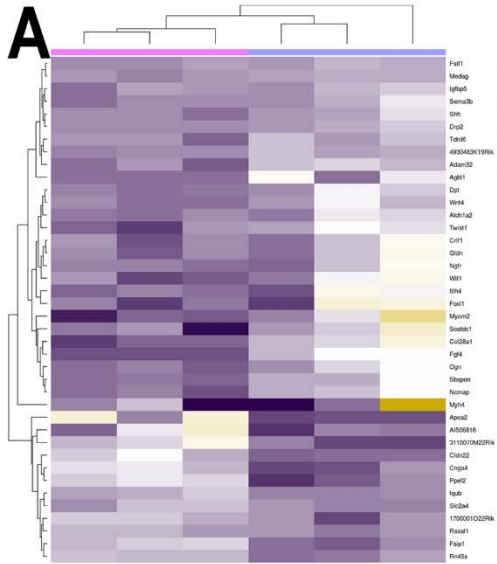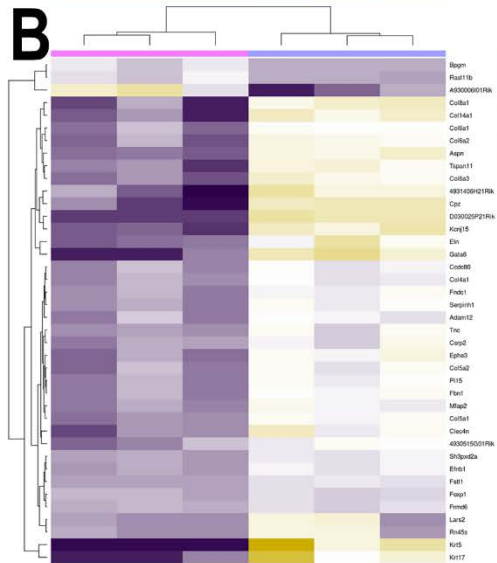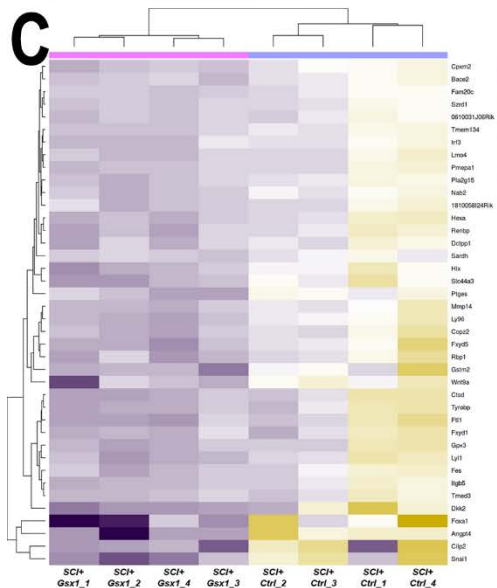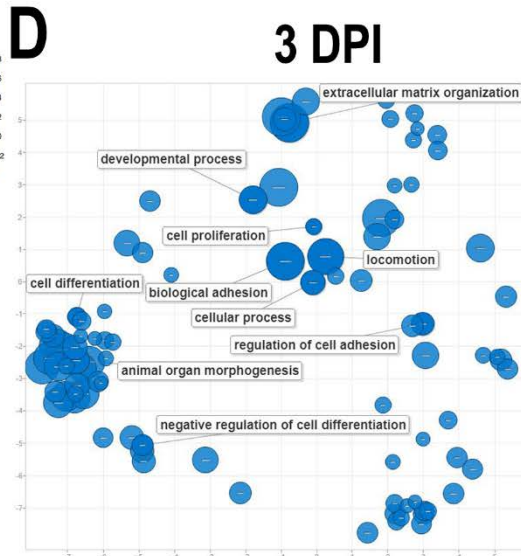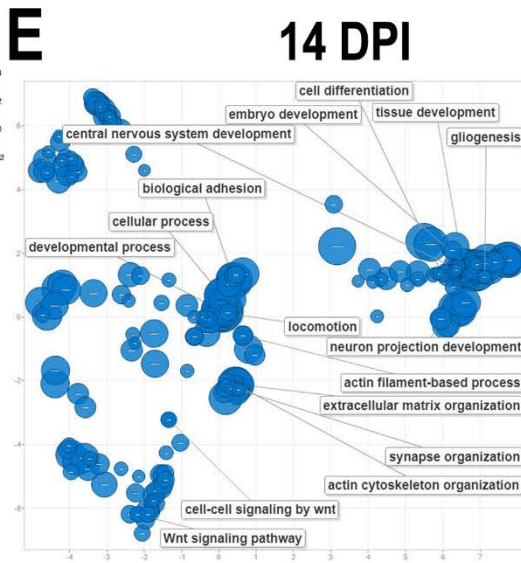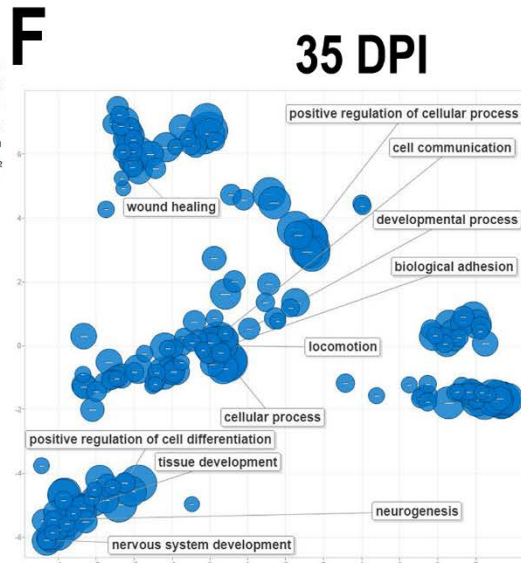



**Figure S3. Top 40 Gsx1-induced differentially expressed genes (DEGs) and functional enrichment of gene ontology (GO) terms**

Heatmaps of the top 40 DEGs between the SCI+Ctrl and SCI+Gsx1 groups at 3 DIP (**A**), 14 DPI (**B**), and 35 DPI (**C**). Purple indicates downregulation and yellow indicates upregulation of the gene expression. Scatter plots of enriched terms for biological process using REVIGO at 3 DPI (**D**), 14 DPI (**E**), and 35 DPI (**F**). Circle size indicates the  $\log_{10}(\text{p-value})$  of the GO terms. For 3 DPI, n=3; 14 DPI, n=3; and 35 DPI, n=4.

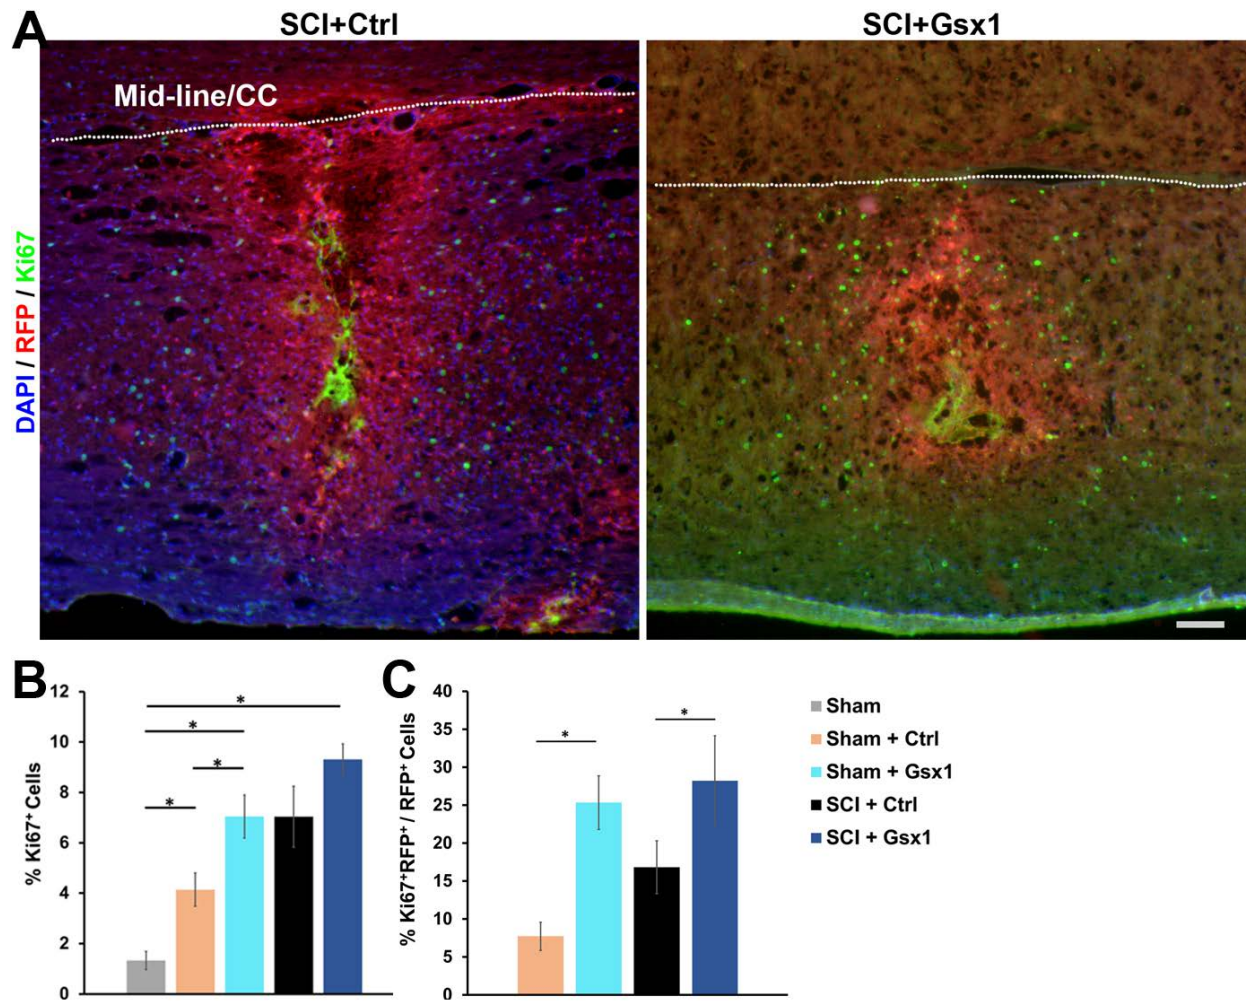

**Figure S4. Gsx1 promotes cell proliferation in both the injured and sham mice.**

(A) Representative low magnification images of sagittal sections through T9-10 spinal cord at 3 DPI showing the expression of viral reporter RFP and cell proliferation marker Ki67. Scale bar=100  $\mu$ m. White dotted line indicates the midline and the central canal of the spinal cord. Red dots/signals show virally transduced cells and green dots show Ki67+ cells at the lesion site. Histograms show the quantification of Ki67+ cells (B) and Ki67+/RFP+ co-labeled cells (C) among RFP+ cells. n = 3; Mean  $\pm$  SEM; \* = p < 0.05 indicates statistical significance; one-way ANOVA and Tukey post-hoc analysis.

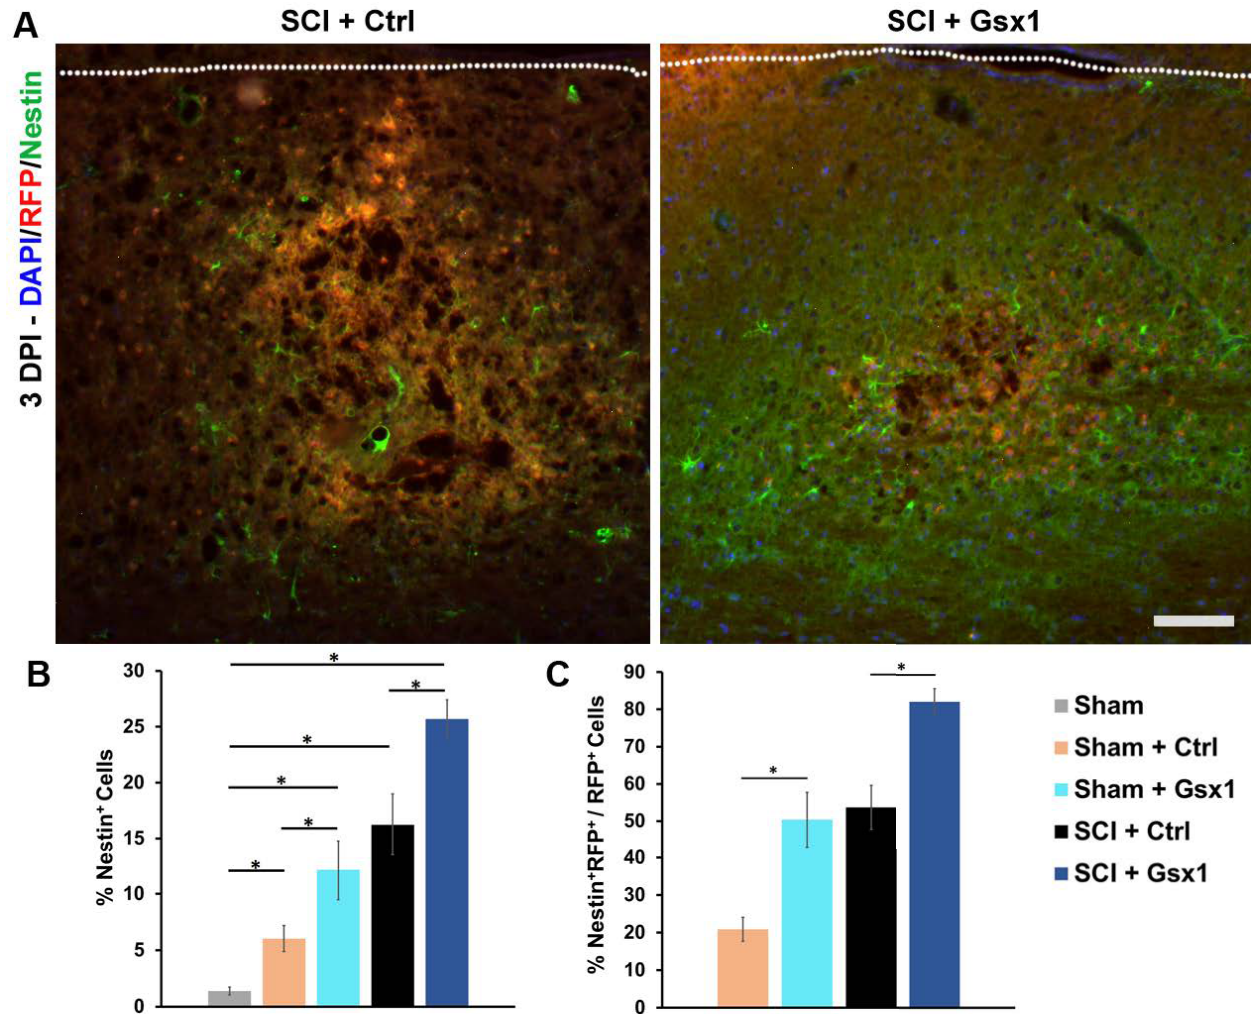

**Figure S5. Gsx1 increased the number of NSPCs in both injured and sham mice.**

(A) Representative low magnification images of sagittal sections through T9-10 spinal cord at 3 DPI showing the expression of viral reporter RFP and NSPC marker Nestin. Scale bar=100  $\mu$ m. White dotted line indicates the midline and central canal of the spinal cord. Red dots/signals show virally transduced cells and green dots show Nestin+ cells. Histograms show the quantification of Nestin+ (B) and Nestin+/RFP+ co-labeled cells (C) among RFP+ cells. n = 3; Mean  $\pm$  SEM; \* = p < 0.05 indicates statistical significance; one-way ANOVA and Tukey post-hoc analysis.

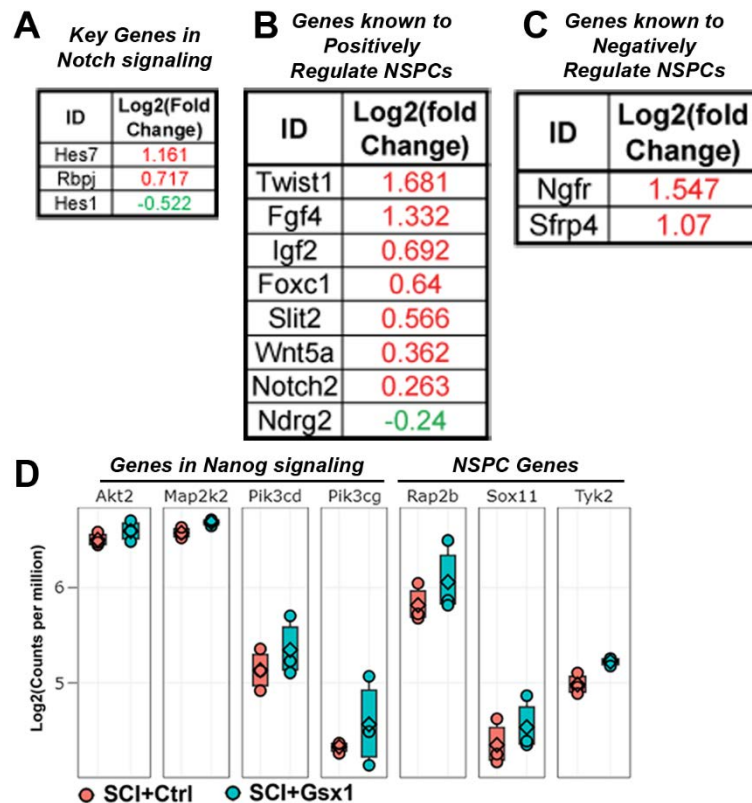

**Figure S6. Gsx1 upregulates NSPC signaling pathways.**

Lists of differentially expressed genes that are known to promote Notch signaling (**A**), and regulate NSPCs (**B-C**) identified by RNA-seq (DESeq2) analysis at 3 DPI. (**D**) Gene expression box plots of the genes associated with Nanog signaling pathway and NSPC genes. Each dot represents the gene expression as  $\log_2(\text{count per million})$  for one biological replicate sample.  $n=3$  for all data points; Mean  $\pm$  SEM; \* =  $p < 0.05$  indicates statistical significance; Students' t-test.



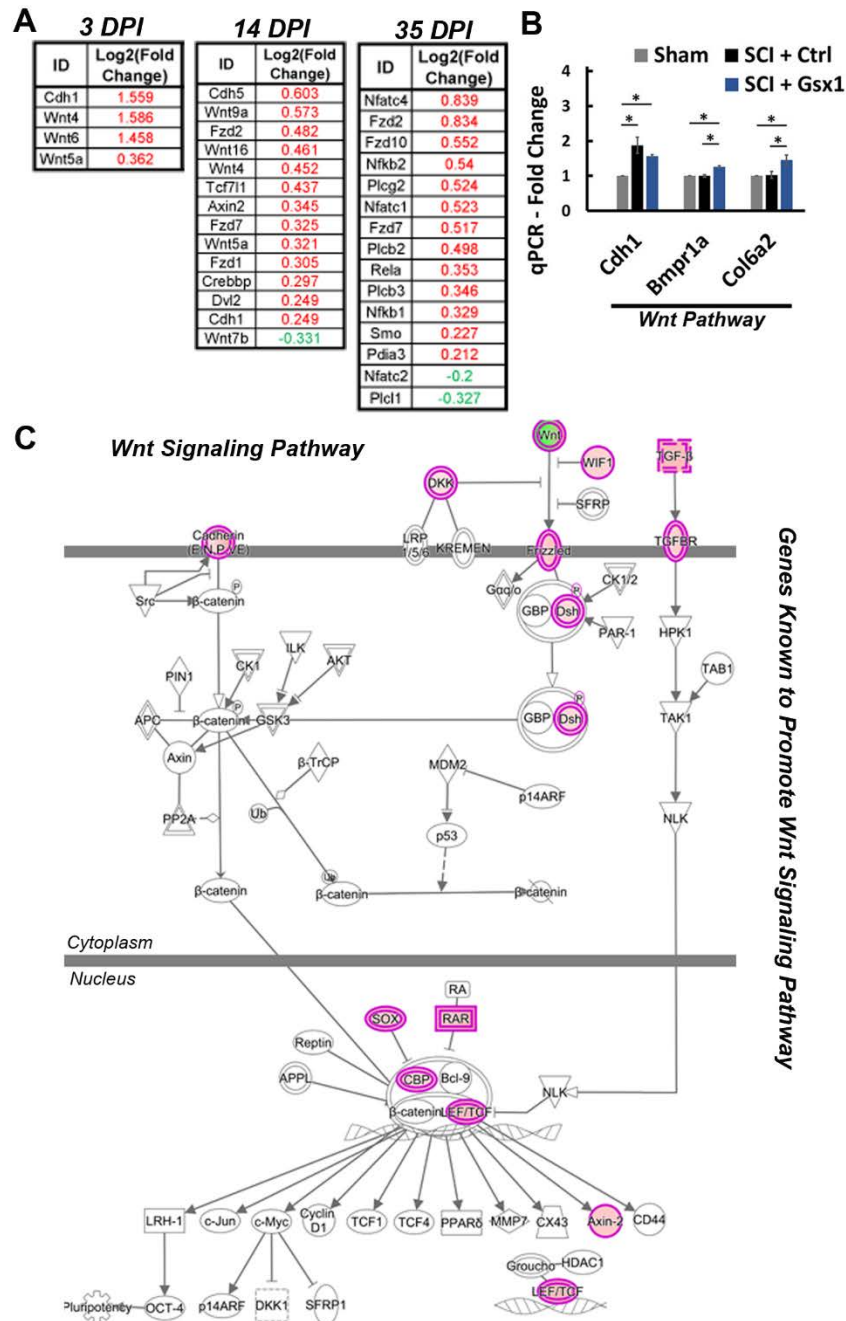

**Figure S7. Gsx1 upregulates Wnt signaling pathway in the injured spinal cord.**

(A) Lists of differentially expressed genes that are involved in Wnt signaling at 3, 14, and 35 DPI from RNA-seq analysis. (B) A histogram shows the RT-qPCR analysis of the genes involved in the Wnt signaling pathway (Cdh1, Bmpr1a and Col6a2). N=3; Mean  $\pm$  SEM; \* =  $p < 0.05$  indicates statistical significance; One-way ANOVA followed by Tukey post-hoc test. (C) A diagram depicts the upregulated Wnt signaling pathway by Gsx1 expression revealed by IPA.

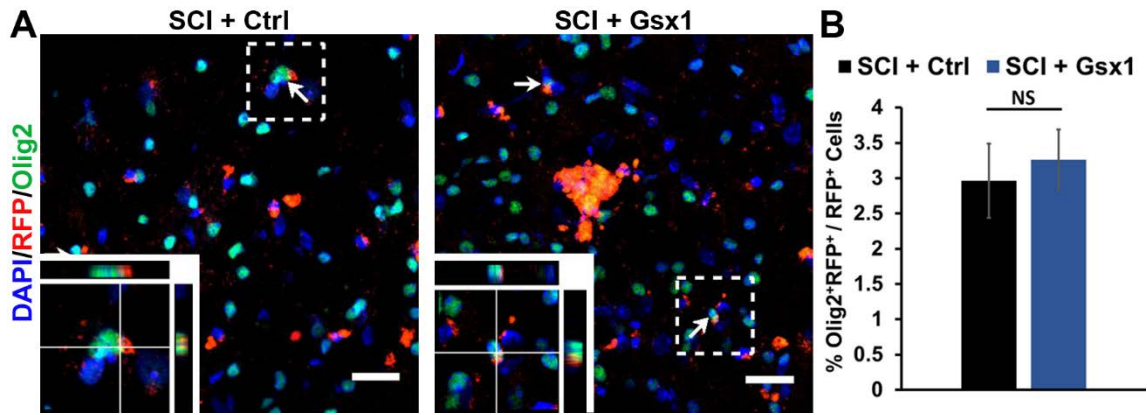

**Figure S8. Gsx1 treatment does not change the number of oligodendrocytes after SCI**

Hemisection SCI was performed on 8-12 weeks old mice around T10 followed by lentivirus injection encoding Ctrl or Gsx1 gene along with RFP reporter. Animals were harvested 56 DPI and sagittal sections are immunostained with oligodendrocyte marker, Olig2 (**A**). Bottom left of the image includes the higher magnification z-stack view of the area denoted by a dashed white line to indicate co-expression. Scale bar = 20  $\mu$ m. (**B**) A histogram shows the quantification of Olig2<sup>+</sup>/RFP<sup>+</sup> among RFP<sup>+</sup> cells at 56 DPI. n = 6; Mean  $\pm$  SEM; \* = p < 0.05 indicates statistical significance; Students' t-test.

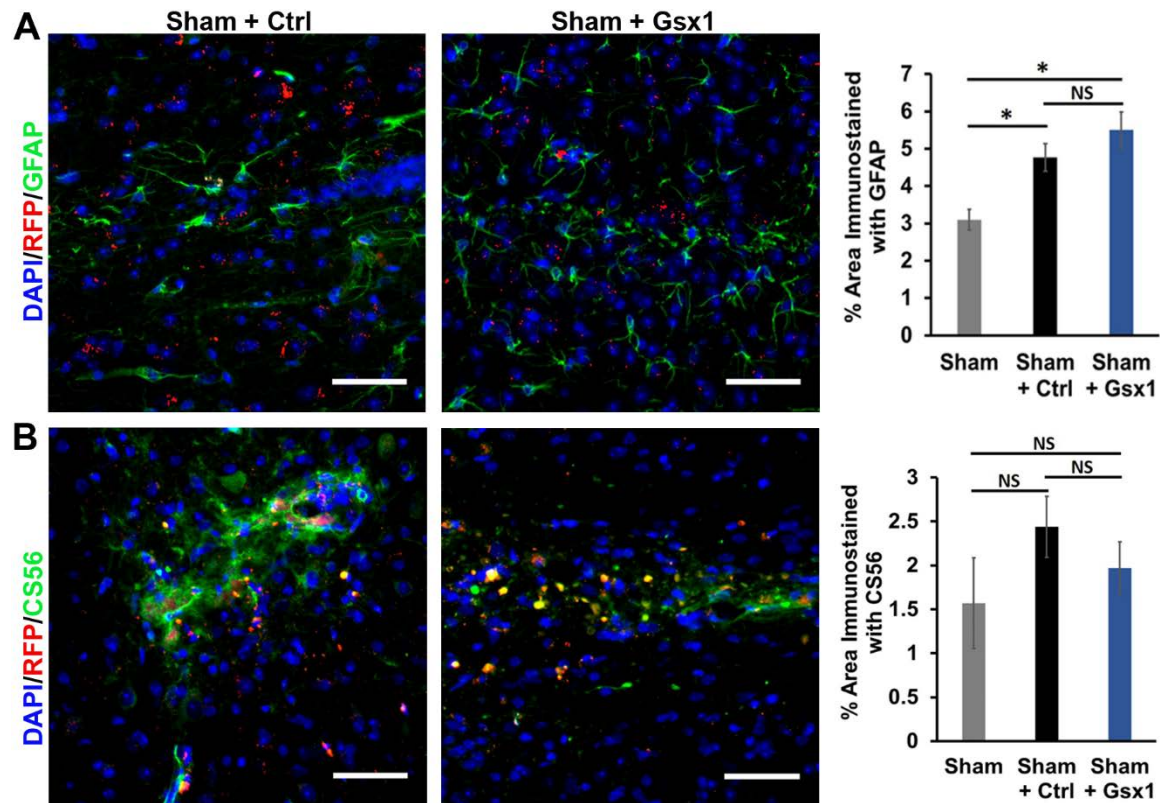

**Figure S9. Effects of Gsx1 on astrogliosis and glial scar formation in the uninjured spinal cord is not significant**

Representative fluorescence images of sagittal sections through the lesion site in the spinal cord at 56 DPI show the expression of viral reporter RFP, GFAP (**A**) and chondroitin sulfate proteoglycan (CSPG, stained with CS56) (**B**), and the quantification of the immunostained area with anti-GFAP and anti-CS56 around the injury site is shown on the right. Scale bar =50  $\mu$ m, n=4 for all three groups: Sham, Sham+Ctrl and Sham+Gsx1. Mean  $\pm$  SEM; \* = p < 0.05 indicates statistical significance; One-way ANOVA followed by Tukey post-hoc test.



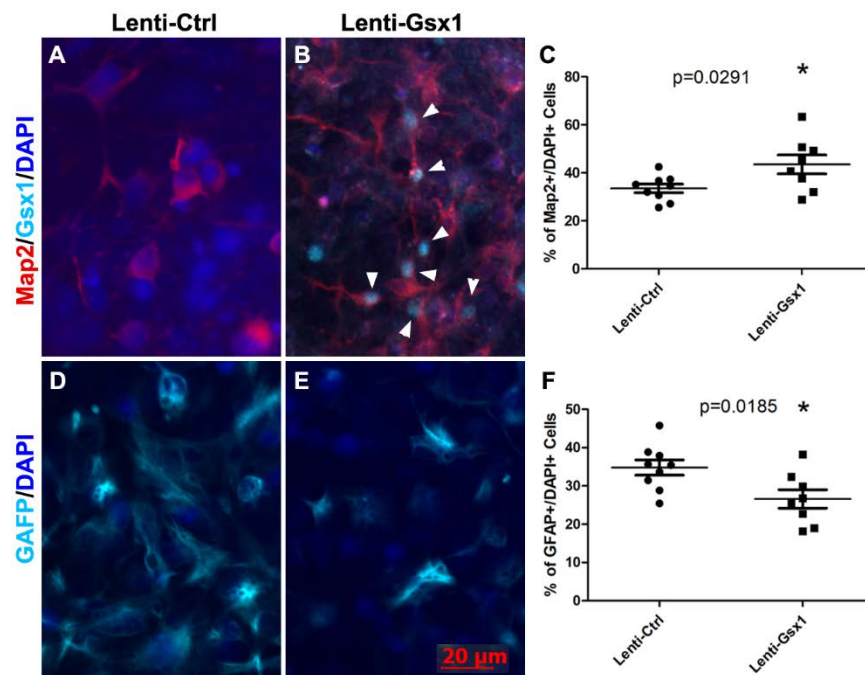

**Figure S10. Gsx1 expression promotes neurogenesis and inhibits astrogliosis *in vitro***

Neural stem cells, NE-4C (ATCC), were cultured for 3 days post transduction before inducing differentiation with  $10^{-7}$  M retinoic acid. The effect of Gsx1 on neural differentiation was performed by lentivirus transduction, a control lentivirus (Lenti-Ctrl) (A, D) and lentivirus carrying Gsx1 (Lenti-Gsx1) (B, E) were transduced into NE-4C cells. Cells were selected with 0.5  $\mu$ g/mL Puromycin for 48-hours 3 days after viral transduction and cultured for 14 more days and followed by immunocytochemistry assay. Arrowheads indicate Gsx1-labeled cells in cyan color confirming lentivirus-mediated Gsx1 expression in virally transduced cells. Cell nuclei were labeled with DAPI in blue. (C, F) histograms of the percentages of MAP2+ neurons and GFAP+ astrocytes over the total number of DAPI+ cells. N=9; Data shown as Mean  $\pm$  SEM. Students' T-test. p-value < 0.05 indicates statistical significance.

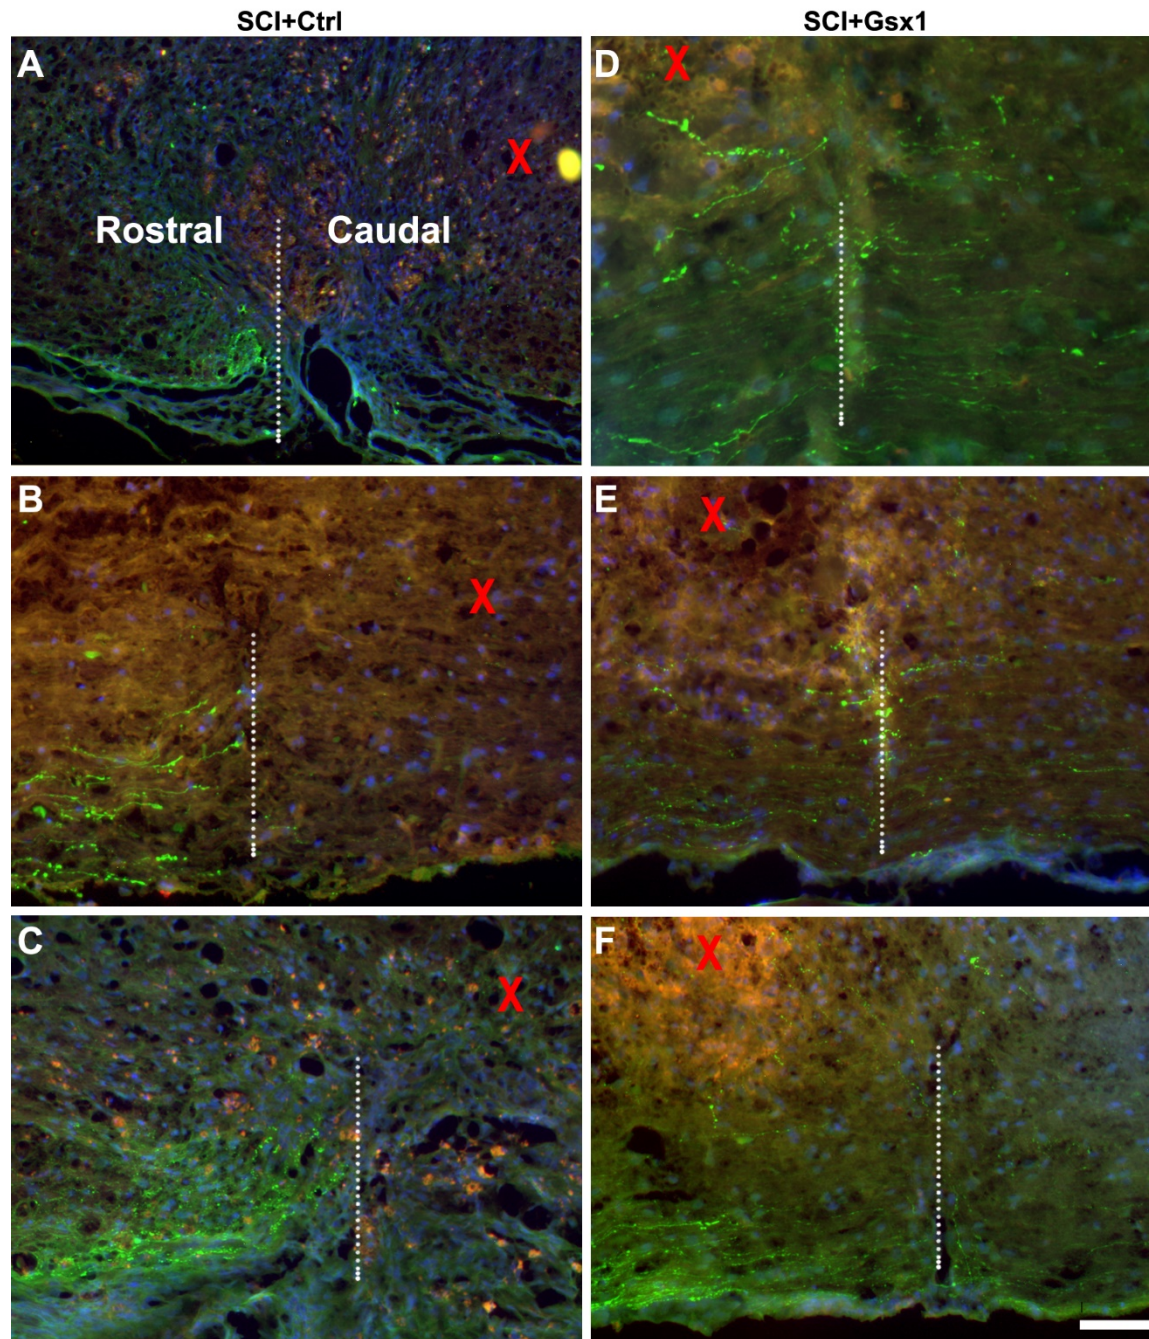

**Figure S11. Gsx1 expression promotes 5-HT neuronal activity**

Hemisection SCI was performed on 8-12 weeks old mice around T10 followed by lentivirus injection immediately after SCI. Representative images of sagittal section of the spinal cord from the SCI+Ctrl (n=3: **A-C**) and SCI+Gsx1 (n=3: **D-F**) groups at 35 DPI. The white dotted line indicates the hemisection site. "X" indicates the virus injection site. In the SCI+Ctrl group, 5-HT immunostained axons stopped rostral to the lesion site (**A-C**). In the SCI+Gsx1 group, 5-HT stained axons were detected caudally to the lesion site (**D-F**). Scale bar = 20  $\mu$ m.

Supplementary Tables S1-3. IPA reports of the DEG-associated signaling pathways induced by Gsx1 expressoin (see attached Microsoft Excel files).

Supplementary Table S4. Top 20 upregulated and 20 downregulated DEGs determined by RNA-seq analysis

|                            |         | 3 DPI                    |                   | 14 DPI  |                   | 35 DPI  |                   |
|----------------------------|---------|--------------------------|-------------------|---------|-------------------|---------|-------------------|
|                            |         | ID                       | Log2(Fold Change) | ID      | Log2(Fold Change) | ID      | Log2(Fold Change) |
|                            |         | Top 20 Upregulated Genes | Ppef2             | 1.7456  | Bpgm              | 0.6457  | 9330175M20Rik     |
| Cnga4                      | 1.5203  |                          | Snca              | 0.6409  | Gm2897            | 0.9209  |                   |
| Tmem51as1                  | 1.4642  |                          | Fam46c            | 0.5624  | 4930525G20Rik     | 0.8941  |                   |
| Al506816                   | 1.3532  |                          | Gjc2              | 0.5451  | Zfp819            | 0.8928  |                   |
| Cdsn                       | 1.3006  |                          | Nkx2-9            | 0.5346  | Ripply2           | 0.8629  |                   |
| G530011O06Rik              | 1.2743  |                          | Ppp1r14a          | 0.5226  | Peg12             | 0.8311  |                   |
| Fsip1                      | 1.2560  |                          | Rsl11b            | 0.5223  | Mum11             | 0.8199  |                   |
| 3110070M22Rik              | 1.2345  |                          | Prr18             | 0.5131  | 1500015L24Rik     | 0.8142  |                   |
| Fbxw10                     | 1.2303  |                          | Klk6              | 0.5103  | 1110015O18Rik     | 0.8049  |                   |
| Galr3                      | 1.2074  |                          | Ptgs1             | 0.5076  | 4930441O14Rik     | 0.8042  |                   |
| Rn45s                      | 1.2041  |                          | Ptp4a1            | 0.4919  | Sox14             | 0.7864  |                   |
| C130026I21Rik              | 1.1821  |                          | S100b             | 0.4672  | Zfp804b           | 0.7683  |                   |
| Erv3                       | 1.1741  |                          | Bin2              | 0.4563  | Mir331            | 0.7637  |                   |
| Afp                        | 1.1694  |                          | Tmem88b           | 0.4517  | Cacna1f           | 0.7612  |                   |
| A330048O09Rik              | 1.1366  |                          | Mbp               | 0.4422  | Fgf5              | 0.7601  |                   |
| Xlr3a                      | 1.1299  |                          | Atp10b            | 0.4393  | Mipol1            | 0.7477  |                   |
| 1700001O22Rik              | 1.1218  |                          | lsg20             | 0.4377  | Mir149            | 0.7471  |                   |
| Apoa2                      | 1.1206  |                          | Al848285          | 0.4364  | Tmem232           | 0.7392  |                   |
| Mir466i                    | 1.1092  |                          | Arhgef37          | 0.4320  | Gpr88             | 0.7370  |                   |
| Crybb1                     | 1.0996  |                          | Plp1              | 0.4288  | 6430584L05Rik     | 0.7369  |                   |
| Top 20 Downregulated Genes | Col28a1 | -2.4223                  | Col1a1            | -2.0110 | Snai1             | -1.4631 |                   |
|                            | Ogn     | -2.0659                  | Aspn              | -1.8378 | Wfdc17            | -1.4354 |                   |
|                            | Wif1    | -1.9547                  | Col1a2            | -1.7949 | Dkk2              | -1.4094 |                   |
|                            | Sbspon  | -1.7291                  | Col6a3            | -1.6645 | Cilp2             | -1.3829 |                   |
|                            | Itih4   | -1.6936                  | Col5a1            | -1.4541 | H19               | -1.3015 |                   |
|                            | Twist1  | -1.6811                  | Kcnj15            | -1.4052 | Asgr2             | -1.2978 |                   |
|                            | Sostdc1 | -1.6651                  | Mfap5             | -1.3046 | Atp6v0a4          | -1.2820 |                   |
|                            | Plekha4 | -1.6475                  | Thbs1             | -1.2104 | Foxa1             | -1.2655 |                   |
|                            | Ncmap   | -1.6447                  | Serpinh1          | -1.1806 | Apoc2             | -1.2628 |                   |
|                            | Aqp1    | -1.6233                  | Ppic              | -1.1093 | Angpt4            | -1.2556 |                   |
|                            | Gldn    | -1.6205                  | Loxl1             | -1.0945 | Fam180a           | -1.2413 |                   |
|                            | Prx     | -1.6059                  | Tnc               | -1.0594 | Cd8b1             | -1.2400 |                   |
|                            | Wnt4    | -1.5861                  | Ltbp2             | -1.0186 | Twist1            | -1.2251 |                   |
|                            | Cdh1    | -1.5587                  | Cpz               | -1.0108 | Pi16              | -1.2225 |                   |
|                            | Ngfr    | -1.5471                  | Scara5            | -0.9871 | Gstm2             | -1.2204 |                   |
|                            | Slc43a1 | -1.5467                  | Scara3            | -0.9867 | Wnt9a             | -1.1770 |                   |
|                            | Foxd1   | -1.5382                  | Rcn3              | -0.9815 | Dpt               | -1.1667 |                   |
|                            | Kcnj13  | -1.5141                  | Mrc2              | -0.9796 | Col6a2            | -1.1481 |                   |
|                            | Crif1   | -1.4928                  | Sh3pxd2a          | -0.9693 | Gpnmh             | -1.1465 |                   |
|                            | Dpt     | -1.4878                  | Tspan11           | -0.9674 | Ms4a7             | -1.1420 |                   |



**Supplementary Table S5. List of primary and secondary antibodies used for immunohistochemistry**

|                                        | Vendor, Catalog                      | Host Species | Type       | RRID        | Dilution |
|----------------------------------------|--------------------------------------|--------------|------------|-------------|----------|
| <b>Primary Antibody</b>                |                                      |              |            |             |          |
| Gsx1                                   | Millipore Sigma, SAB2104632          | Rabbit       | Polyclonal | AB_10667904 | 1 : 200  |
| Ki67                                   | Abcam, ab15580                       | Rabbit       | Polyclonal | AB_443209   | 1 : 1000 |
| Nestin                                 | Abcam, ab6142                        | Mouse        | Monoclonal | AB_305313   | 1 : 200  |
| Caspase3                               | Cell Signaling, 9661S                | Rabbit       | Polyclonal | AB_2341188  | 1 : 300  |
| DCX                                    | Santa Cruz Biotechnology, sc-8067    | Goat         | Polyclonal | AB_2088491  | 1 : 100  |
| PDGFRa                                 | Abcam, ab61219                       | Rabbit       | Polyclonal | AB_2162341  | 1 : 100  |
| NeuN                                   | Millipore Sigma, MAB377              | Mouse        | Monoclonal | AB_2298772  | 1 : 300  |
| GFAP                                   | Millipore Sigma, G3893               | Mouse        | Monoclonal | AB_477010   | 1 : 400  |
| Olig2                                  | Millipore Sigma, AB9610              | Rabbit       | Polyclonal | AB_570666   | 1 : 500  |
| vGlut2                                 | Millipore Sigma, AB2251-I            | Guinea Pig   | Polyclonal | AB_2665454  | 1 : 1000 |
| ChAT                                   | Millipore Sigma, SAB2500236          | Goat         | Polyclonal | AB_10603616 | 1 : 300  |
| GABA                                   | Millipore Sigma, A-2052              | Rabbit       | Polyclonal | AB_477652   | 1 : 3000 |
| CS56                                   | Millipore Sigma, C8035               | Mouse        | Monoclonal | AB_476879   | 1 : 200  |
| Map2                                   | Invitrogen, MA5-12826                | Mouse        | Monoclonal | AB_10976831 | 1 : 500  |
| GFAP                                   | Invitrogen, PA1-10019                | Rabbit       | Polyclonal | AB_1074611  | 1 : 1000 |
| <b>Secondary Antibody</b>              |                                      |              |            |             |          |
| Alexa Fluor 488 Donkey anti Mouse      | Jackson Immuno Research, 715-545-150 | -            | Polyclonal | AB_2340846  | 1 : 200  |
| Alexa Fluor 488 Donkey anti Rabbit     | Jackson Immuno Research, 711-545-152 | -            | Polyclonal | AB_2313584  | 1 : 200  |
| Alexa Fluor 488 Donkey anti Goat       | Jackson Immuno Research, 705-545-003 | -            | Polyclonal | AB_2340428  | 1 : 200  |
| Alexa Fluor 488 Donkey anti Guinea Pig | Jackson Immuno Research, 706-545-148 | -            | Polyclonal | AB_2340472  | 1 : 200  |
| Alexa Fluor 647 Donkey anti Mouse      | Jackson Immuno Research, 715-605-150 | -            | Polyclonal | AB_2340862  | 1 : 200  |
| Alexa Fluor 647 Donkey anti Rabbit     | Jackson Immuno Research, 711-605-152 | -            | Polyclonal | AB_2492288  | 1 : 200  |
| Alexa Fluor 647 Donkey anti Goat       | Jackson Immuno Research, 705-605-003 | -            | Polyclonal | AB_2340436  | 1 : 200  |
| Alexa Fluor 647 Donkey anti Guinea Pig | Jackson Immuno Research, 706-605-148 | -            | Polyclonal | AB_2340476  | 1 : 200  |

Supplementary Table S6. List of primers for qRT-PCR analysis

| Gene               | Forward (5' -> 3')      | Reverse (5' -> 3')      |
|--------------------|-------------------------|-------------------------|
| Gsx1               | CTTCCCTCCCTTCGGATCG     | GTCCACAGAGATGCAGTGAAA   |
| Cd68               | GGACCCACAACCTGCACTCAT   | AAGCCCCACTTTAGCTTTACC   |
| Iltgam             | ATGGACGCTGATGGCAATACC   | TCCCCATTCACGTCTCCCA     |
| Cd86               | TGTTTCCGTGGAGACGCAAG    | TTGAGCCTTTGTAAATGGGCA   |
| Il1b               | GCAACTGTTCCCTGAACTCAACT | ATCTTTTGGGGTCCGTCAACT   |
| Tnf                | CCTGTAGCCCACGTCGTAG     | GGGAGTAGACAAGGTACAACCC  |
| Ki67 (Mki67)       | ATCATTGACCGCTCCTTTAGGT  | GCTCGCCTTGATGGTTCCT     |
| Nestin             | CCCTGAAGTCGAGGAGCTG     | CTGCTGCACCTCTAAGCGA     |
| NeuN<br>(Hrnbp3)   | AACCACGAACTCCACCCTTC    | GACCTCAATTTTCCGTCCCTC   |
| vGlut<br>(Slc17a6) | TGGAAAATCCCTCGGACAGAT   | CATAGCGGAGCCTTCTTCTCA   |
| Th                 | GTCTCAGAGCAGGATACCAAGC  | CTCTCCTCGAATACCACAGCC   |
| Tph1               | AACAAAGACCATTCTCCGAAAG  | TGTAACAGGCTCACATGATTCTC |
| Chat               | CCATTGTGAAGCGGTTTGGG    | GCCAGGCGGTTGTTTAGATACA  |
| Gfap               | CGGAGACGCATCACCTCTG     | AGGGAGTGGAGGAGTCATTCG   |
| Lcn2               | GCAGGTGGTACGTTGTGGG     | CTCTTGTAGCTCATAGATGGTGC |
| Serpina3n          | ATTTGTCCAATGTCTGCGAA    | TGGCTATCTTGGCTATAAAGGGG |
| Notch1             | CCCTTGCTCTGCCTAACGC     | GGAGTCCTGGCATCGTTGG     |
| Nrarp              | AAGCTGTTGGTCAAGTTCGGA   | CGCACACCGAGGTAGTTGG     |
| Jag1               | CCTCGGGTCAGTTTGAGCTG    | CCTTGAGGCACACTTTGAAGTA  |
| Jag2               | CACTGTCCGTCAGGATGGAAC   | TAGCCGCCAATCAGGTTTTTTG  |
| Dll1               | CCCATCCGATTCCCCTTCG     | GGTTTTCTGTTGCGAGGTCATC  |
| Hes1               | TCAGCGAGTGCATGAACGAG    | CATGGCGTTGATCTGGGTCA    |
| Cdh1               | CAGGTCTCCTCATGGCTTTGC   | CTTCCGAAAAGAAGGCTGTCC   |
| Bmpr1a             | TGCAAGGATTCACCGAAAGC    | TGCCATCAAAGAACGGACCTAT  |
| Col6a2             | GCTCCTGATTGGGGACTCT     | CCAACACGAAATACACGTTGAC  |
| Ctnna1             | AAGTCTGGAGATTAGGACTCTGG | ACGGCCTCTCTTTTTATTAGACG |
| Ntng1              | TGCTAAACACAGTCATTTGCGT  | GCACACATTCTCATCGTCCAG   |
| Syn1               | AGCTCAACAAATCCCAGTCTCT  | CGGATGGTCTCAGCTTTTAC    |

**Supplementary Videos.** Open field locomotor behavior observation of the sham; SCI+Ctrl, and SCI+Gsx1 animals, related to [Figure 6H](#).
